# Supplementary material
Source: PubMed Central journal article supplement (PMC4103324)
Supplement: 1314939111_pnas.1314939111.sapp.pdf [file 1314939111_pnas.1314939111.sapp.pdf]

## Supporting Information (Materials and Methods)

**Animals.** Mice were maintained under a 12-hour light/12-hour dark cycle with free access to water and standard mouse diet (66% carbohydrate, 12% fat, 22% protein). *Oct1*<sup>-/-</sup> mice were generated as previously described (1) and backcrossed 10 generations to FVB/N or C57BL/6J background. *Oct1*<sup>-/-, ob/ob</sup> mice were generated by crossing *Oct1*<sup>+/-</sup> and *Oct1*<sup>+/-, Ob/ob</sup> mice. pLIVE In Vivo Expression vector (Mirus Bio LLC, Madison, WI, USA) was used to generate the liver-specific transgenic human *OCT1* mice. Human *OCT1* was cloned to Nhe I (5') and Xho I (3') sites, and then was cut from the vector between Bgl I and Nde I. The linear fragment containing *OCT1* was purified and then was injected to C57BL/6J mice (Genomic Core at Gladstone Institutes at UCSF, USA). The detailed vector construction was described in the supplementary materials (Supplementary Fig. S5A and S5B) (2). Unless mentioned otherwise, all experiments were performed in FVB mice with the exception of the experiments with the transgenic mice in which all mice strains were C57BL/6J, consistent with the background of the *OCT1* transgenic mice. Animal studies described herein were reviewed and approved by UCSF IACUC.

**Animal experiments.** All the animal studies were conducted in male mice. In general, unless otherwise specified, mice were 16 to 20 weeks old. For the thiamine tissue accumulation study, age-matched *Oct1*<sup>+/+</sup> and *Oct1*<sup>-/-</sup> male mouse littermates (10 to 14 weeks) fasted for 16 hours were given an intravenous dose (2 mg/kg) with 0.2  $\mu$ Ci/g of [<sup>3</sup>H] thiamine (American Radiolabeled Chemicals, St. Louis, MO, USA) and sacrificed at early time point (5 min) or 1 hour later. Tissues were removed, weighed and homogenized with lysis buffer (1% SDS and 1 N NaOH). For pharmacokinetic studies, after the same dose of thiamine, mice were placed in metabolic cages and tail blood samples were collected at various times points. Plasma was obtained following centrifugation of the blood samples, and total thiamine products (radioactive thiamine plus thiamine metabolites) were measured with a scintillation counter. For the thiamine and metformin interaction study, *Oct1*<sup>+/+</sup> mice fasted for 16 hours were given an intravenous dose (2 mg/kg) with 0.1  $\mu$ Ci/kg of [<sup>3</sup>H] thiamine with or without 50 mg/kg metformin. For chronic dosing studies, metformin was administered daily 100 mg/kg intraperitoneally and plasma and tissue levels of thiamine and its metabolites were quantified at the end of 7 days. Blood was drawn at various time points. 10  $\mu$ l of plasma was analyzed by scintillation counting at different time points ranging from 2.5 min to 4 hours. For the ORO staining and Western blotting, *Oct1*<sup>+/+</sup>, *Oct1*<sup>-/-</sup>, *Oct1*<sup>+/+, ob/ob</sup>, *Oct1*<sup>-/-, ob/ob</sup>, *Oct1*<sup>+/+, OCT1<sup>tg</sup></sup> and *Oct1*<sup>-/-, OCT1<sup>tg</sup></sup> male mouse littermates were fasted for 16 hours. Mice were fasted for 16 hours for the plasma triglyceride (TG)/insulin/glucose characterization studies,

but not the MRI study, which was performed in unfasted mice. All diets were obtained from Harlan Laboratories, Inc (Madison, WI, USA): normal chow (2016); high fat diet (consisting of 55% calories from fat; 25% from carbohydrate and 15% from protein) (**TD.93075**), thiamine deficiency food (TD.81029). Pair-fed control chow was modified from thiamine deficiency food (TD.81029) by adding 20 mg/kg thiamine hydrochloride (Sigma-Aldrich, St. Louis, MO, USA) (TD.120472). For high fat diet treatment, mice were kept on high fat diets for 16 weeks starting at 4-week old. For studies using thiamine deficient diets, 12- to 16-week old mice were fed thiamine deficiency food for 3 weeks or 1 week before the characterization.

**Cell culture.** HEK-293 Flip-in cells were cultured as described (1, 3). Primary hepatocytes (12- to 16-week old mice) were isolated from adult mice by a modified version of the collagenase method in the UCSF Liver Center. Hepatocytes were maintained in Dulbecco's Modified Eagle's Medium (DMEM H-21) (4.5g/Liter Glucose) (UCSF cell culture facility, USA) medium with 1X ITS (Insulin-Transferrin-Selenium), 1X penicillin/streptomycin and 10% fetal bovine serum (Life technologies, Grand Island, NY, USA) for 6 hours allowing the cells to attach to the plate bottom. After the cells attached, the medium was switched to DMEM H-21 with 1X penicillin/streptomycin for 16 hours, followed by drug treatment as described below (Foretz et al., 2010). After serum fasting, hepatocytes were cultured in glucose-free DMEM H-21 (UCSF cell culture facility) containing antibiotics alone or with 100  $\mu$ M Bt2-cAMP (Sigma-Aldrich), with or without various doses of metformin (Sigma-Aldrich) or AICAR (Toronto Research Chemicals, Toronto, Ontario, Canada) for 6 hours before harvesting. For the thiamine effect on the AMPK activation study, primary hepatocytes were fasted by described above. Then various percentages of DMEM H-21 medium (thiamine, 4mg/L) were blended with thiamine-deficient DME H21 (thiamine, 0 mg/L) to adjust the thiamine levels in the medium. After 6 hours incubation, cells were harvested and subject to the assays. For glycolysis studies, hepatocytes were exposed to Isonitroamine (400  $\mu$ M) for 8 hours and then nucleotides and P-AMPK were measured.

**TG, glucose, insulin and lactate assays.** Lipids were extracted from mouse liver tissue or human liver tissues purchased from Asterand (Detroit, MI, USA) and Capital Biosciences (Rockville, MD, USA) using the Folch method (4). Extracts were evaporated under a stream of nitrogen and resuspended in chloroform:methanol (2:1) containing 0.01% butyrate hydroxyltoluene. Aliquots were dried and resuspended in 1-butanol containing 0.01% butyrate hydroxyltoluene for measurement of total TG (BioVision, Milpitas, CA, USA). Results were reported as milligrams of TG per gram liver. Glucose was measured using the OneTouch® Blood Glucose Meters (Lifescan,

Milpitas, CA, USA). Insulin from plasma was measured using the ELISA assay following the manufacturer's protocol (EMD Millipore, Billerica, MA, USA). Lactate assays were conducted with a kit from BioVision.

**Metabolomics study.** Metabolomic studies were performed in the Metabolomics Core of the UC Davis Genome Center (Davis, CA, USA). Metabolomics methods for highly polar metabolites were applied to supernatants obtained from sonicated samples using methanol as extraction solvent from mouse liver, HEK293 cell lines and hepatocytes from *Oct1*<sup>+/+</sup> and *Oct1*<sup>-/-</sup> mice (5). Hydrophilic interaction chromatography (HILIC-LC/ESI-MS) analysis was performed with the use of a modified silica-based column (Luna HILIC Diol, 150 X 3mm, 3 mm particle size; Phenomenex, Torrance, CA, USA). The mobile phases were 100 mM ammonium formate (pH 4.0) (A) and acetonitrile (B) (flow rate 0.4ml/min at 408°C). After a 2-min isocratic run at 3% A, a sequential ramping scheme was followed up to 40% A for total injection time of 20 min. The injection volume was set to 10 µl. The entire effluent from the HPLC column was directed into the ESI source of an LTQ linear ion trap (LIT) mass spectrometer (Thermo Fisher) operated under Xcalibur software (v1.4, Thermo Fisher). Full scan spectra were acquired from 100–1500 amu at unit mass resolution with maximum injection time set to 200 ms in one micro scan. Acquisition was performed in both positive/negative switching modes. A sucrose tune file in negative/positive modes at high LC flow rate was used during all of the LC/ESIMS acquisitions on the LTQ mass spectrometer. Exported data sets in netCDF format were further converted and loaded into the MarkerView 1.1 software (Applied Biosystems, Foster City, CA, USA). Peak alignment and peak picking parameters were adjusted in accordance with the chromatography quality (peak width, baseline, background noise, etc.). Principle component analysis (PCA) was performed. Data point reduction was applied to remove components possessing low relative variances of metabolite abundance. Modified peak lists were exported into Statistica Data Miner (StatSoft, Tulsa, OK, USA) for further analysis.

To quantify the TMP and TPP level in mouse liver by LC/MS, 200 µl of saline solution was added to 25 mg of liver. Liver was homogenized and 1 mL of acetonitrile containing 1 µM of internal standard (IS) to precipitate protein. The mixture was kept on ice for 5 minutes then vortexed for 5 minutes. The mixture was centrifuged at 15,000 rpm for 10 minutes and 800 µL of clear supernatant was transferred to the glass tubes. The supernatant was evaporated then the residue is reconstituted in 200 µL of water before transferred to the new centrifuge 1.5 mL tube. The constituted solution was centrifuged at 15,000 rpm for 10 minutes. The supernatant was used for LC-MS/MS analysis. Standard curves for TMP and TPP were constructed.

**Quantification of thiamine, thiamine monophosphate and thiamine pyrophosphate in mouse plasma by LC/MS/MS method.** Molecular MS Diagnostics, Inc. (Cranston, Rhode Island, USA) developed the methods for quantification of thiamine, thiamine monophosphate and thiamine pyrophosphate (thiamine diphosphate) in mouse plasma samples. All chemicals and reagents used in this analysis were HPLC grade or reagent grade. Plasma samples were extracted by aliquoting 100  $\mu$ L of plasma sample into a 1.5 mL Eppendorf vial. 400  $\mu$ L of internal standard (20 ng/mL carbutamide) in methanol with 0.1% formic acid were added to each vial, and then vortexed each sample for 30 seconds. The samples were then centrifuged at 13,500 rpms for 5 minutes to spin down all precipitated plasma proteins. All 200  $\mu$ L of the supernatant was decanted to an appropriate labeled 1 mL HPLC sample vial. The samples were evaporated to dryness under heated Nitrogen gas (60 °C) for 15 minutes, resuspended in 50  $\mu$ L of mobile phase A, and injected (10  $\mu$ L) onto the HPLC-MS/MS system for analysis. Tandem-mass spectrometry (MS/MS) was performed on a triple stage quadrupole from Perkin Elmer SCIEX API 4000 (Sciex, Concord, Ontario, Canada) with an atmospheric pressure ionization (API) chamber. The HPLC column is coupled to the mass spectrometer. The analytical column used was Phenomenex, Synergi 4  $\mu$ m Hydro-RP-80A, 4  $\mu$ m particle, 50 x 4.6 mm, part number 00B-4375-E0. A reversed phase chromatography was used. The following is the chromatography conditions and operation conditions for detecting thiamine and the metabolites.

**Mobile Phases:**

|                     |                                               |
|---------------------|-----------------------------------------------|
| Mobile Phase A:     | DI water with 0.01% Trifluoroacetic acid(v/v) |
| Mobile Phase B:     | MeOH with 0.01% Trifluoroacetic acid(v/v)     |
| Column Temperature: | Ambient                                       |
| Injection Volume:   | 10 $\mu$ L                                    |
| LC Method:          | Gradient                                      |

|                                        |                               |
|----------------------------------------|-------------------------------|
| Run Time:                              | 5.0 minutes                   |
| Thiamine retention time:               | 1.2 min $\pm$ 0.2 min         |
| Thiamine Monophosphate retention time: | 1.0 min $\pm$ 0.2min          |
| Thiamine Diphosphate:                  | 0.9 min $\pm$ 0.2min          |
| Carbutamide (IS) retention time:       | 2.4 min $\pm$ 0.2 min         |
| Flow rate:                             | 700 $\mu$ L/min               |
| Autosampler:                           | Samples 8-10 C temperature    |
|                                        | Solvent 1 Wash Mobile Phase B |
|                                        | Solvent Wash 2 Mobile Phase A |

**Detail of LC Gradient method**

| Step | Start | Sec | Flow  | Grad           | %B  | Comments                                    |
|------|-------|-----|-------|----------------|-----|---------------------------------------------|
| 1    | 0.00  | 45  | 0.700 | Hold           | 0   | Load Sample                                 |
| 2    | 0.75  | 75  | 0.700 | Ramp<br>Linear | 0   | Start Gradient on analytical column into MS |
| 3    | 2.0   | 6   | 0.700 | Hold           | 100 | Hold                                        |
| 4    | 2.60  | 36  | 0.700 | Hold           | 100 | Immediate Step Down, Re-equilibrate         |

|   |      |     |       |      |   |                |
|---|------|-----|-------|------|---|----------------|
| 5 | 2.61 | 6   | 0.700 | Hold | 0 | Re-equilibrate |
| 6 | 4.75 | 132 | 0.700 |      | 0 | Re-equilibrate |

Mode of operation: positive ion mode, multiple reaction monitoring (MRM) of the transitions from  $[M+H]^+$  to a suitable daughter ion

| Q1 Mass (amu)                   | Q3 Mass | Dwell (msec) | DP | FP  | EP    | CE |
|---------------------------------|---------|--------------|----|-----|-------|----|
| 265.10 (Thiamine)               | 122.20  | 50           | 50 | 200 | 10.00 | 25 |
| 345.20 (Thiamine Monophosphate) | 122.10  | 50           | 50 | 280 | 10.00 | 30 |
| 425.20 (Thiamine Diphosphate)   | 122.20  | 50           | 50 | 280 | 10.00 | 30 |
| 272.7 (IS)                      | 74.0    | 50           | 50 | 200 | 10    | 25 |

**Over-expressing human OCT1 in *C. elegans* and Huh7.** The constructs of pINT:GFP, pINT::GFP::OCT1 and pdaf-1::RFP and fat staining were prepared following a previously described method (6, 7). Huh7 cells were transfected using a lipofectamine-mediated method (Life Technologies). 48-hours following transfection, cells were harvested and subject to various analysis.

**mRNA Expression Levels.** Taqman gene expression assays for all human and mouse genes were performed using Applied Biosystems 7500 Fast Real-Time PCR System using inventoried probes (Applied Biosystems, Foster City, CA, USA). The relative expression level of each mRNA transcript was calculated by the comparative method ( $\Delta\Delta C_t$  method)  $\beta$ -Actin was used as housekeeping gene for normalization (3).

**Western blotting, tissue staining and flow cytometry.** For Western blotting, cultured cells or tissues were analyzed using established procedures (3). The primary antibodies were anti -AMPK complex, -P-ACC, -ACC, -LKB1, -PDH, -FASN, - $\beta$ -Actin (Cell Signaling Technology, Danvers, MA), -OGDH, -TPK1 and -TKT (Proteintech, Chicago, IL, USA). The secondary anti-mouse or rabbit HRP antibodies were obtained from Cell Signaling Technology. For the quantification of Western blot bands, the ImageJ method was used (<http://rsb.info.nih.gov/ij/index.html>). For immunostaining, tissue sections from frozen or paraffin-embedded mouse tissue slides were used (3). The antibodies were anti-glutamine synthetase (GS) (Millipore, Billerica, MA, USA), -human OCT1 (Abcam, Cambridge, MA), - $\beta$ -Gal and -pyruvate dehydrogenase (PDH) (Cell signaling). The secondary antibodies Alexa Fluor® 488 or 594 anti-rabbit or mouse were from life technologies. For paraffin embedded sections, the tissue sections were placed in a rack, and the following dewax procedures were performed: 1. Xylene: 2 x 3 min; 2. Xylene 1:1 with 100% ethanol: 3 min;

3. 100% ethanol: 2 x 3 min; 4. 95% ethanol: 3 min; 5. 70 % ethanol: 3 min; 6. 50 % ethanol: 3 min; 7. Running cold tap water to rinse. For the frozen tissue sections, sections were soaked in 1XPBS for 15 min at room temperature before the staining. Prior to antibody application, sections were steamed in 0.01 M citric acid buffer (pH 6.0) for 15 min then cooled in 1X PBS for 15 min at room temperature. Sections were blocked in 10% lamb serum and 0.5% triton-X100 for 45 min, then incubated with rabbit primary antibodies for 1 hour or overnight at 4 °C. Following the 1<sup>st</sup> antibody incubation, sections were washed in PBS and then incubated for 1 hour with secondary antibodies following 3X10 min washes in 1XPBS. The resulting sections were placed on coverslips with Aqueous Mounting Medium (Thermal Fisher). The nucleus was stained with diamidino-2-phenylindole (DAPI). 5-bromo-4-chloro-3-indolyl- $\beta$ -d-galactopyranoside (X-Gal) (Sigma) staining followed a published method (8). Briefly, tissue samples were fixed in 1% paraformaldehyde in 1 $\times$  PBS for 60 min and then washed several times in rinse buffer (0.1 M NaPi [pH 7.4], 2 mM MgCl<sub>2</sub>, 0.01% sodium deoxycholate, 0.02% NP-40). Samples were then stained in 5-bromo-4-chloro-3-indolyl- $\beta$ -d-galactopyranoside (X-Gal) buffer (5 mM potassium ferrocyanide [K<sub>4</sub>Fe(CN)<sub>6</sub>], 5 mM potassium ferricyanide [K<sub>3</sub>Fe(CN)<sub>6</sub>], 1 mg of X-Gal/ml) for 24 h in an incubator set at 30°C. Stained samples were rinsed in 10% formalin and stored in 1 $\times$  PBS prior to mounting and imaging. All the pictures were taken using a Retiga CCD-cooled camera and associated QCapture Pro software (QImaging Surrey, BC Canada). For flow cytometry, the primary hepatocytes were fixed with 1% PFA for 30 minutes and analyzed on a BD FACSCalibur Flow Cytometer (BD Bioscience, San Jose, CA, USA).

**ELISA Assays for P-AMPK and P-ACC.** ELISA kits to quantify P-AMPK and P-ACC were used in experiments with hepatocytes. The ELISA kits are available from Cell Signalling Technology: P-AMPK ELISA (PathScan® Phospho-AMPK $\alpha$  (Thr172) Sandwich ELISA Kit) and P-ACC ELISA (PathScan® Phospho-Acetyl-CoA Carboxylase (Ser79) Sandwich ELISA Kit). The protocols described in their product inserts were followed. For maximum effect, the amount of protein required for optimum results are 25  $\mu$ g for P-AMPK and 75  $\mu$ g for P-ACC.

**Transport studies.** Transport kinetic studies were performed in transfected HEK293 cell lines as described previously using radiolabeled substrates and unlabeled inhibitors (1).  $V_{max}$ ,  $K_m$  and  $IC_{50}$  values were assessed by fitting the data using GraphPad Prism version 4.02 (GraphPad).

**Free Fatty Acid (FFA)  $\beta$ -Oxidation, liver enzyme and Nucleotide Assays.** FFA oxidation was assessed in mouse hepatocytes by measuring the production of <sup>14</sup>CO<sub>2</sub> from [1-<sup>14</sup>C] palmitic acid

following a published method (9) except the William E medium was replaced with DME H-21. The specific activity of [ $1\text{-}^{14}\text{C}$ ] palmitic acid (Perkin Elmer) used in the study was 60 mCi/mmol. AMPKi is an acronym for AMPK inhibitor, also known as compound C. It is a cell-permeable pyrazolopyrimidine compound that inhibits KDR/VEGFR2, ALK2/BMPR-I, AMPK kinase activity ( $\text{IC}_{50}$  = 25.1, 148, and 234.6 nM, respectively) (<http://www.millipore.com/catalogue/item/171260-1mg>). For FFA  $\beta$ -oxidation in liver homogenates, a Potter-Elvehjem homogenizer was used with 0.5 g of liver manually homogenized in 10 mL of ice-cold isolation buffer (220 mM mannitol, 70 mM sucrose, 2 mM HEPES, 0.1 mM EDTA pH 7.4). Aliquots of homogenate (300  $\mu\text{L}$ ) were added to 1.7 ml of reaction medium (50 mM sucrose, 150 mM Tris-HCl, 20 mM  $\text{KH}_2\text{PO}_4$ , 10 mM  $\text{MgCl}_2\cdot 6\text{H}_2\text{O}$ , 2 mM EDTA, 1 mM L-carnitine, 0.2 mM CoA, 2 mM NAD, 0.1 mM malate, 10 mM ATP, 1 mM Palmitate complexed to fatty acid-free albumin at a 5:1 molar ratio in DME H21, 0.3  $\mu\text{Ci}$  of [ $1\text{-}^{14}\text{C}$ ]-palmitate (Amersham Biosciences), pH 7.4. Reactions performed in a sealed flask were allowed to proceed for 30 min in a shaking water bath at 37°C. Incubations were terminated by the addition of 1 ml of 3 M perchloric acid to the reaction medium to precipitate protein and non metabolized palmitate and then further incubated at room temperature for 2 h for collection of  $^{14}\text{CO}_2$  into a suspended well containing 500  $\mu\text{L}$  of ethanolamine. Blanks were prepared by acidification of the reaction medium immediately after the addition of the homogenate. Radioactivity in  $\text{CO}_2$  was quantified by liquid scintillation spectrometry.

Serum liver enzyme assays were performed at the clinical chemistry laboratory of the San Francisco General Hospital (San Francisco, CA, USA). ATP production from HEK293 cells or primary hepatocytes was assayed using CellTiter-Glo® luminescent cell viability assay kit (Promega, Madison, USA). A thiamine-deficient DME H21 was used and various thiamine amounts were added from 0 to 4 mg/L (UCSF cell culture facility). Mice were fasted for 16 hours and then liver was collected for hepatic ATP, ADP, and AMP determination. To determine the adenine nucleotide levels, bioluminescent assays were used for quantifying the concentrations of AMP, ADP and ATP (Promega). Protocols from the manufacturer (Promega) were followed to determine the nucleotides levels (ATP: Promega Kinase-Glo®; ADP: ADP-Glo®; and AMP: AMP-Glo®). Liver samples or cells were extracted using lysis buffer provided by the manufacturer.

**Magnetic resonance imaging (MRI) of mice liver.** Mice fed high fat diets (55% fat calories) for 16 weeks were studied. All  $^1\text{H}$  magnetic resonance imaging (MRI) was conducted on a 14.1T wide-bore micro-imaging system (Agilent Systems, Cupertino, CA) equipped with a 40mm  $^1\text{H}$  transmit/receive volume RF coil. Liver volume was quantified using a multi-slice T2-weighted spin

echo sequence (TE=7ms, TR=1.8s) with a FOV of 30 x 30 mm (matrix size of 256 x 192). Percent fat content was assessed using a 2-point Dixon method approach (10) with data acquired with analogous parameters. The liver was segmented in both sequences and these regions of interest were used to calculate both volume and percent fat.

**Data analysis.** Data are expressed as mean  $\pm$  standard error of the mean (Mean  $\pm$  SEM). For statistical analysis, the Student's t-test was used. The data were analyzed using GraphPad Prism 4.0 (GraphPad Software Inc.). A *P* value less than 0.05 was considered statistically significant, \**P*<0.05, \*\**P*<0.01 and \*\*\**P*<0.001. For pharmacokinetic studies, area under the plasma concentration time curve (AUC) and half-life ( $t_{1/2}$ ) were calculated from the data by model independent methods using WinNonlin (1).

**Acknowledgements.** We thank Dr. Jacqueline J. Maher and Chris Her (University of California, San Francisco (UCSF) Liver Center) and Dr. Hui-Hua Chang (UCSF) for technical support; Drs. John Watson, Oliver Fiehn, and Vladimir Tolstikov for helpful discussions; Dr. Oliver Fiehn, Angela Beliveau, and Kristine Sales (University of California, Davis Genome Center, West Coast Metabolomics Center) for technical work and support for the metabolomics studies; Dr. Roy Roberto Gerona (UCSF) for technical work and advice; Dr. Chien-Ming Li (Optivia); and the UCSF Liver Center and the Gladstone Genomics Core for technical work with mouse strains and tissues. This work was supported by the National Institutes of Health Grants GM36780 and GM61390. K.R.K. was supported by K99 award (EB014328).

## **References**

1. Shu Y, *et al.* (2007) Effect of genetic variation in the organic cation transporter 1 (OCT1) on metformin action. *The Journal of clinical investigation* 117(5):1422-1431.
2. Wooddell CI, Reppen T, Wolff JA, & Herweijer H (2008) Sustained liver-specific transgene expression from the albumin promoter in mice following hydrodynamic plasmid DNA delivery. *Journal of Gene Medicine* 10(5):551-563.
3. Chen L, *et al.* (2010) Role of organic cation transporter 3 (SLC22A3) and its missense variants in the pharmacologic action of metformin. *Pharmacogenetics and genomics* 20(11):687-699.
4. Pickens MK, *et al.* (2009) Dietary sucrose is essential to the development of liver injury in the methionine-choline-deficient model of steatohepatitis. *Journal of Lipid Research* 50(10):2072-2082.
5. Urayama S, Zou W, Brooks K, & Tolstikov V (2010) Comprehensive mass spectrometry based metabolic profiling of blood plasma reveals potent discriminatory classifiers of pancreatic cancer. *Rapid Communications in Mass Spectrometry* 24(5):613-620.

6. Mullaney BC & Ashrafi K (2009) C-elegans fat storage and metabolic regulation. *Biochimica Et Biophysica Acta-Molecular and Cell Biology of Lipids* 1791(6):474-478.
7. Srinivasan S, *et al.* (2008) Serotonin regulates C-elegans fat and feeding through independent molecular mechanisms. *Cell Metabolism* 7(6):533-544.
8. Kasus-Jacobi A, *et al.* (2005) Functional characterization of mouse RDH11 as a retinol dehydrogenase involved in dark adaptation in vivo. *Journal of Biological Chemistry* 280(21):20413-20420.
9. Longuet C, *et al.* (2008) The Glucagon Receptor Is Required for the Adaptive Metabolic Response to Fasting. *Cell metabolism* 8(5):359-371.
10. Ma J (2008) Dixon techniques for water and fat imaging. *Journal of Magnetic Resonance Imaging* 28(3):543-558.

# **Supporting Information (Supplementary Figures )**

# Figure S1

S1A

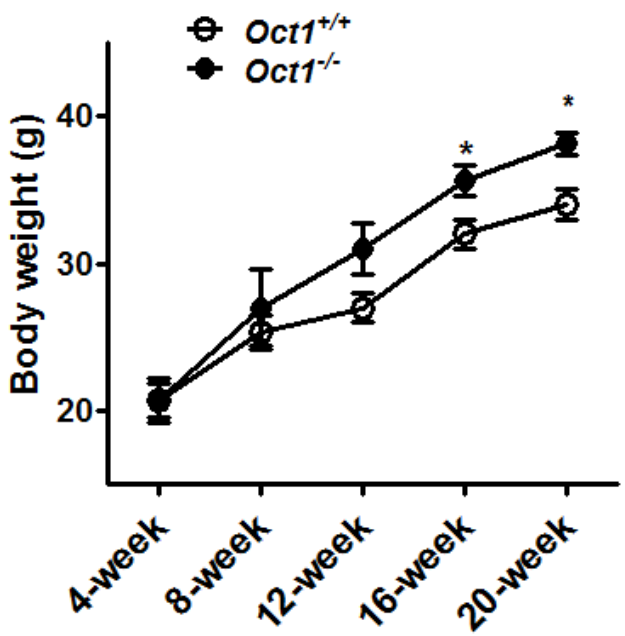

S1B

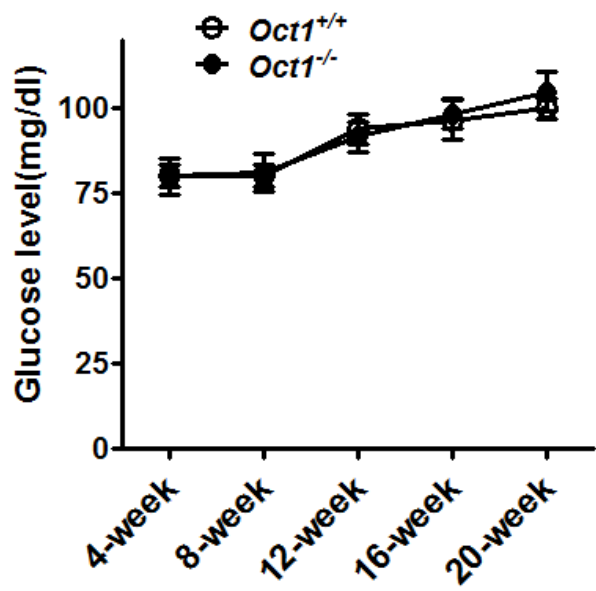

**Figure S1. Oct1 deficiency results in changes in liver characteristics including triglyceride levels.** (A) Time course of body weight of *Oct1*<sup>+/+</sup> and *Oct1*<sup>-/-</sup> mice from 4-weeks to 20-weeks. Mice were maintained with free access to water and normal mouse diet. (B) Plasma glucose levels from 4-weeks to 20-weeks (n=10/genotype).

## S1C

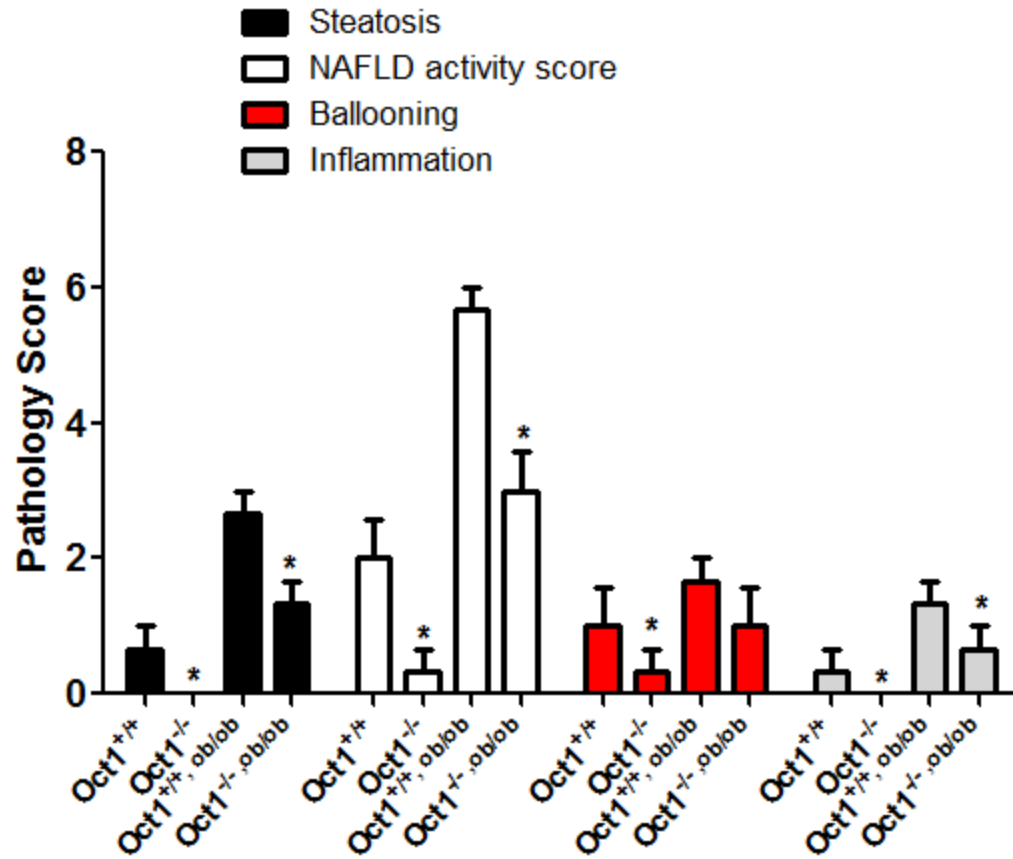

(C) The pathology scores of the livers according to the minimal Kleiner/Brunt criteria (steatosis, NAFLD, ballooning, inflammation). The steatosis and NAFLD in *Oct1*<sup>-/-</sup> or *Oct1*<sup>-/-</sup>, *ob/ob* mouse livers improved over their wildtype counterpart. \*P < 0.05, compared with *Oct1*<sup>+/+</sup> or *Oct1*<sup>+/+</sup>, *ob/ob* mouse livers.

**S1D**

*Oct1*<sup>+/+</sup>

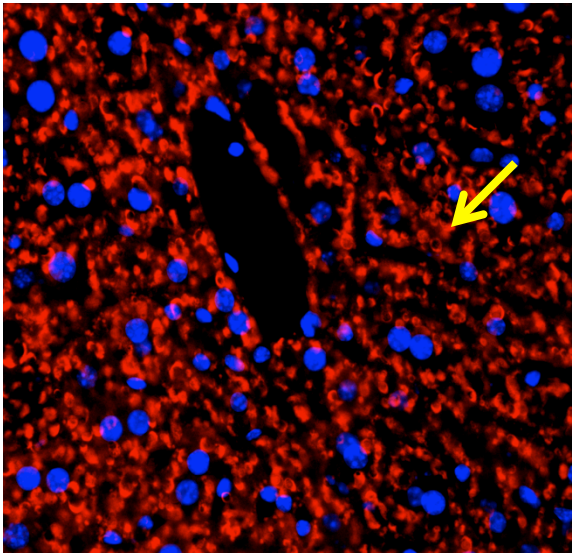

*Oct1*<sup>-/-</sup>

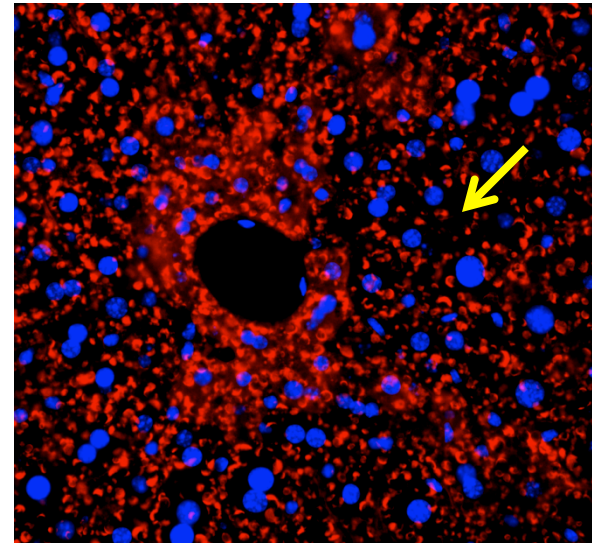

(D) Representative tight junction staining of *Oct1*<sup>+/+</sup> and *Oct1*<sup>-/-</sup> mouse livers with ZO-1. In the area of central vein, the *Oct1*<sup>-/-</sup> mouse livers showed a slightly looser pattern than wildtype mice (yellow arrow), suggesting that there may be polarity change by losing Oct1.

S1E

*Oct1*<sup>+/+</sup>

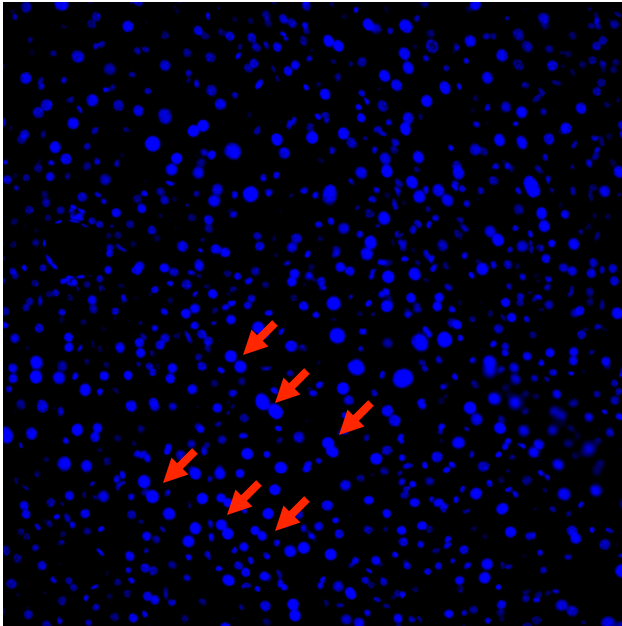

*Oct1*<sup>-/-</sup>

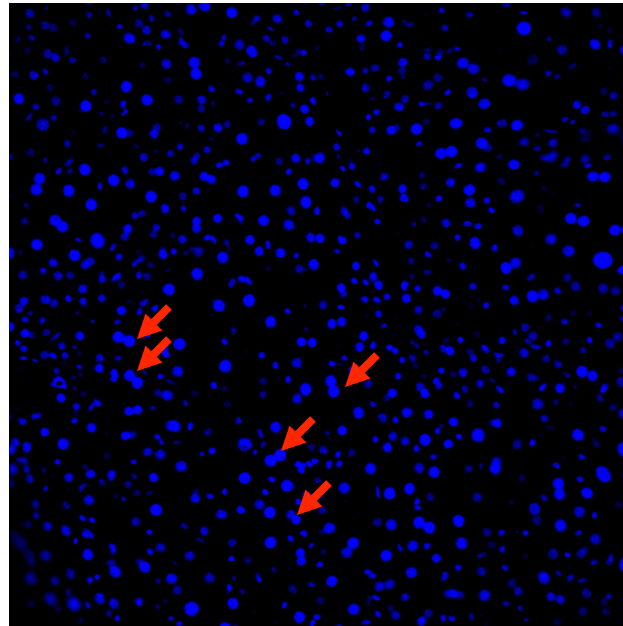

(E) Representative DAPI staining of *Oct1*<sup>+/+</sup> and *Oct1*<sup>-/-</sup> mouse livers. The ploidy of the cells showed no differences between of *Oct1*<sup>+/+</sup> and *Oct1*<sup>-/-</sup> mouse livers, as most hepatocytes were normally binucleate in both mouse lines. Red arrows indicate some of the binucleate cells.

S1F

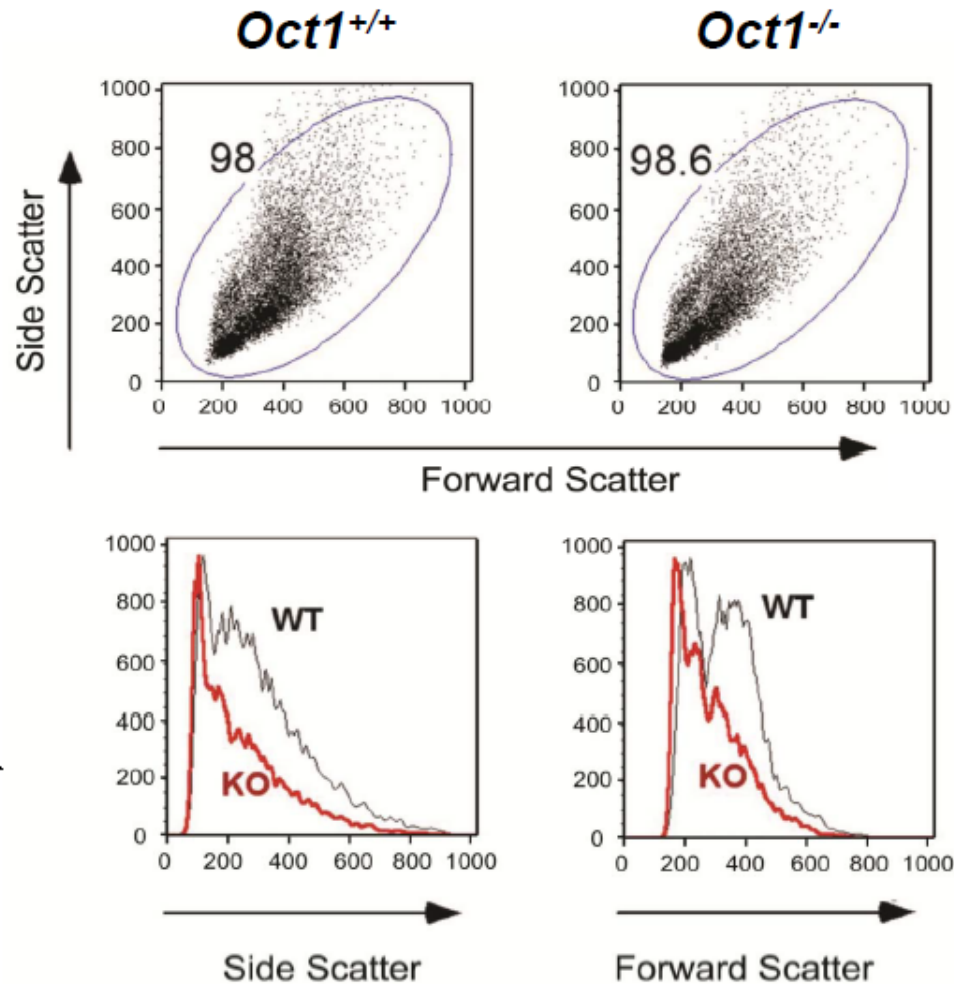

(F) Representative flow cytometry scans of cell size of primary hepatocytes from *Oct1*<sup>+/+</sup> and *Oct1*<sup>-/-</sup> mice. Numbers on the Y- and X- axes indicate cell numbers. Data are mean  $\pm$  SEM. \* $p < 0.05$ , \*\* $p < 0.01$ , \*\*\* $p < 0.001$ .

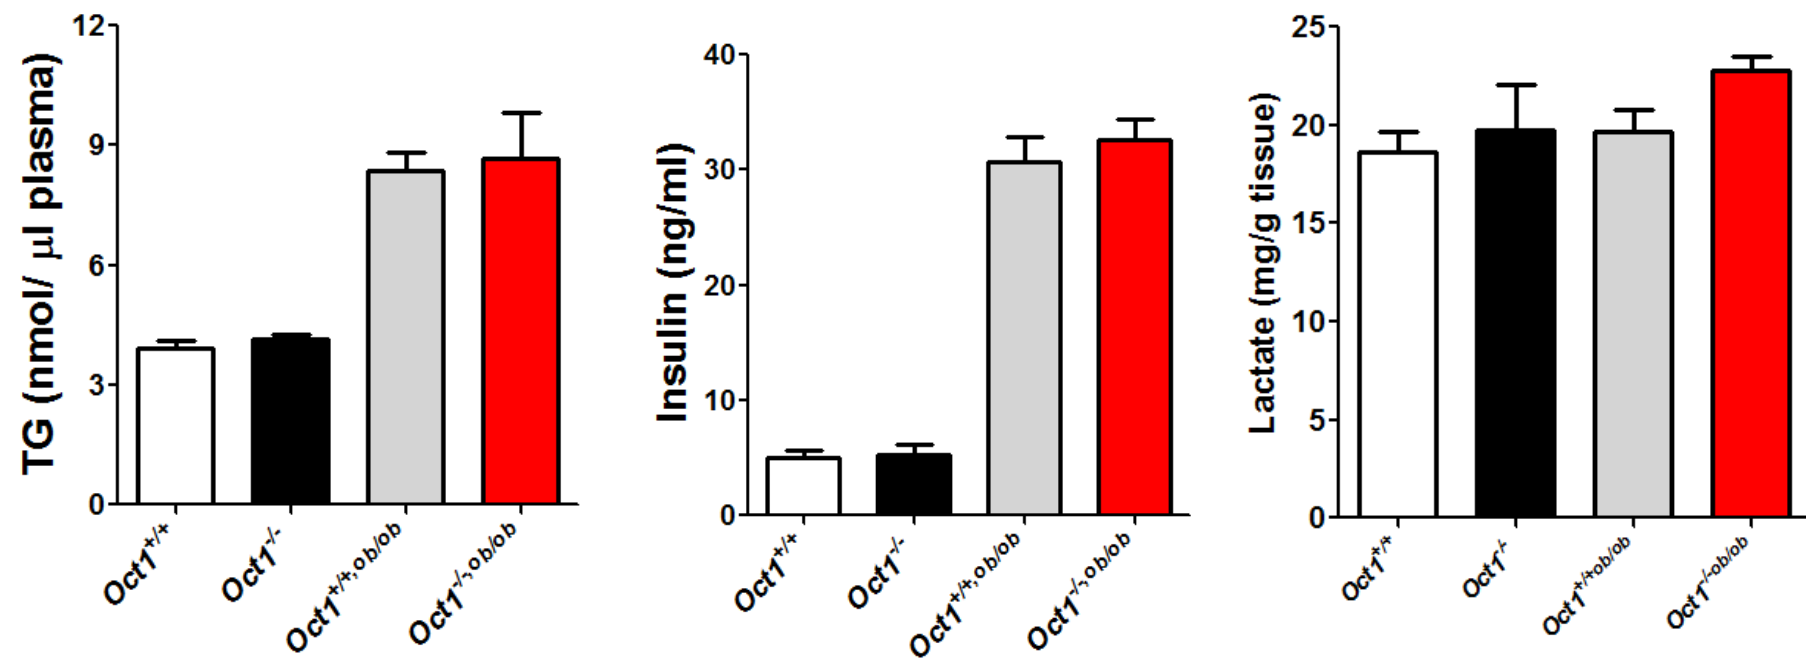

(G) Triglyceride (TG), insulin and lactate levels from the plasma of *Oct1*<sup>+/+</sup>, *Oct1*<sup>-/-</sup>, *Oct1*<sup>+/+,ob/ob</sup> and *Oct1*<sup>-/-,ob/ob</sup> mice at 16-weeks (lean mice=10/genotype, ob/ob mice=6/genotype). Mice were fasted for 18 hours and then TG, insulin and lactate were measured respectively.

# Figure S2

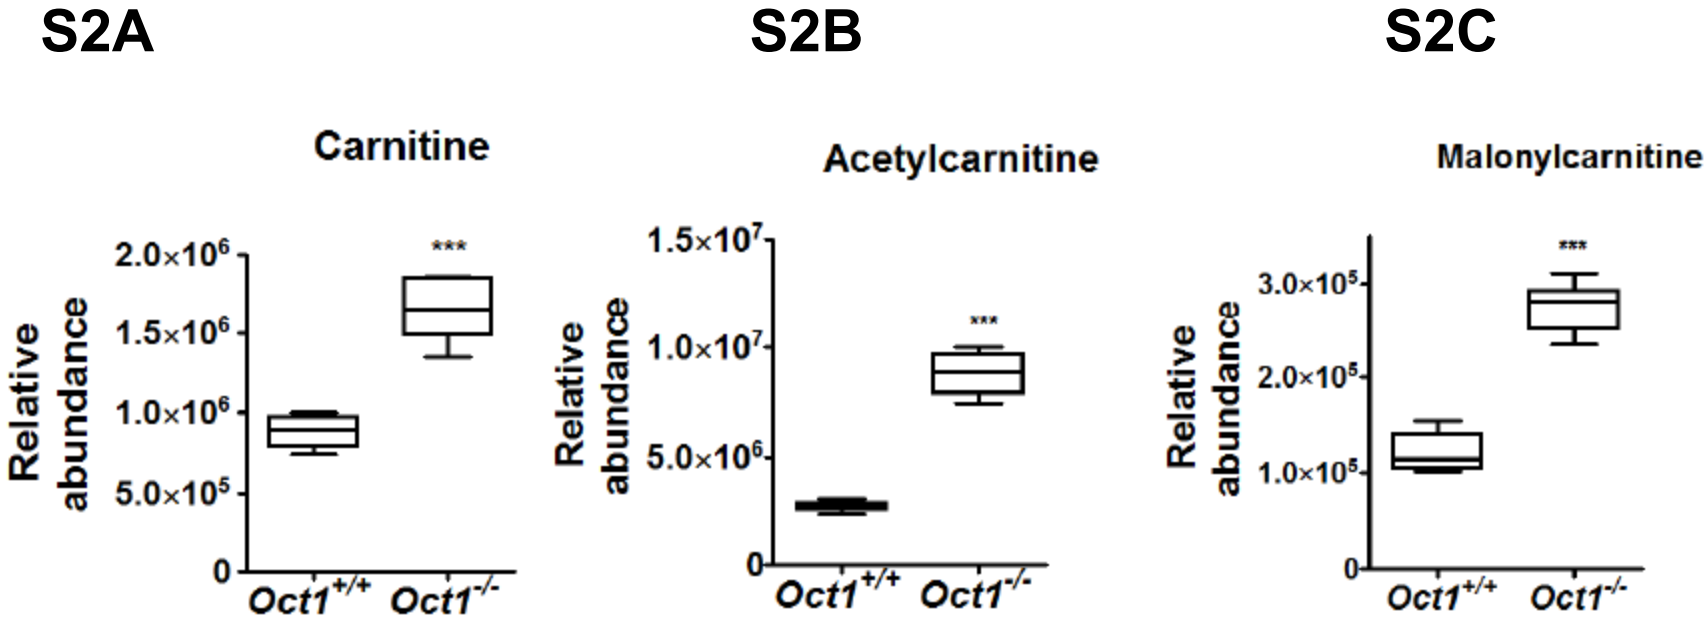

**Figure S2. *Oct1*<sup>-/-</sup> mouse liver exhibit increased fatty acid  $\beta$ -oxidation and AMPK activation.** (A-C) Results of metabolomic studies of liver extracts from *Oct1*<sup>+/+</sup> and *Oct1*<sup>-/-</sup> mice (n=6/genotype). Carnitine, acetylcarnitine and malonylcarnitine represent three of the most significantly elevated metabolites in hepatic extracts from *Oct1*<sup>-/-</sup> mice.

S2D

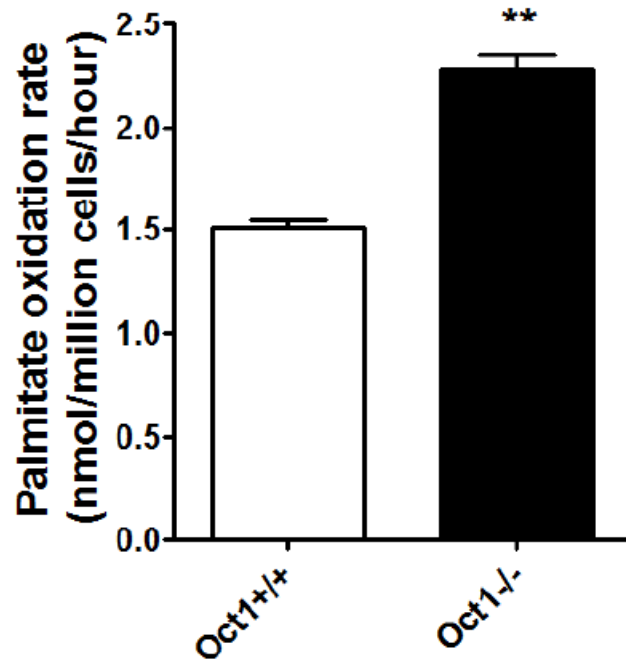

S2E

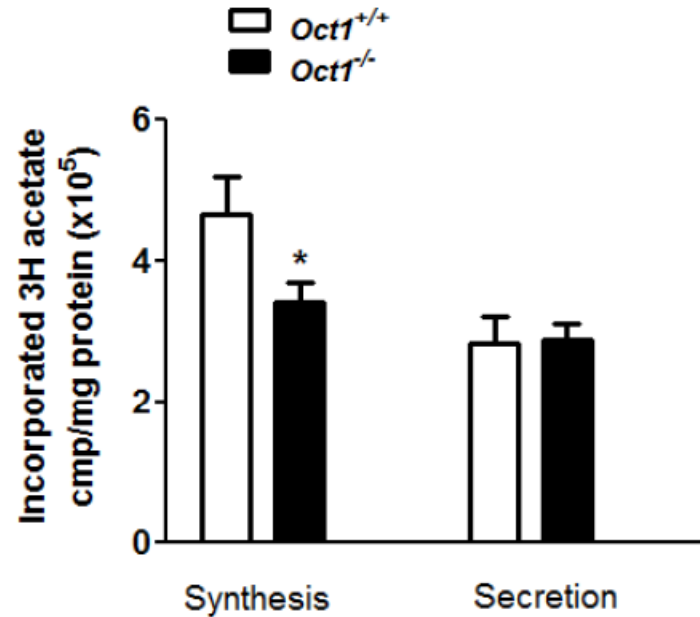

(D and E) Free fatty acid  $\beta$ -oxidation rates (D) and fatty acid synthesis and secretion (E) in primary hepatocytes from *Oct1*<sup>+/+</sup> and *Oct1*<sup>-/-</sup> mice (n=6/genotype).

S2F

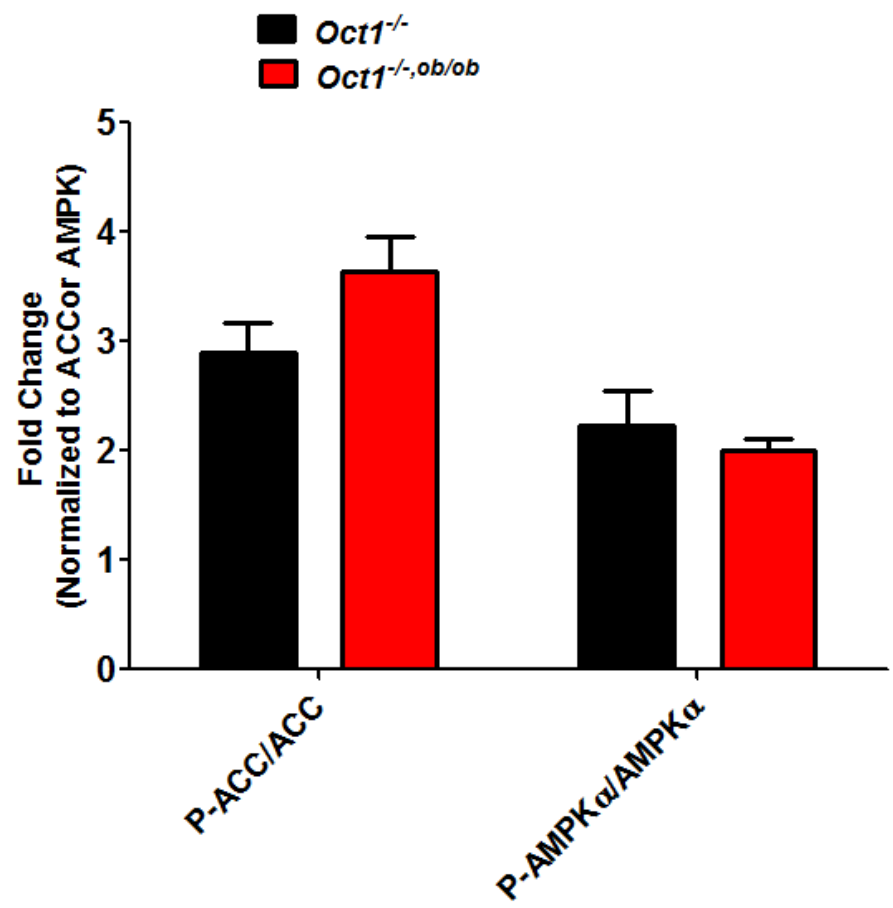

(F) Ratios of P-ACC to ACC and P-AMPK $\alpha$  normalized to AMPK $\alpha$  in livers from *Oct1*<sup>-/-</sup> and *Oct1*<sup>-/-,ob/ob</sup>.

**S2G**

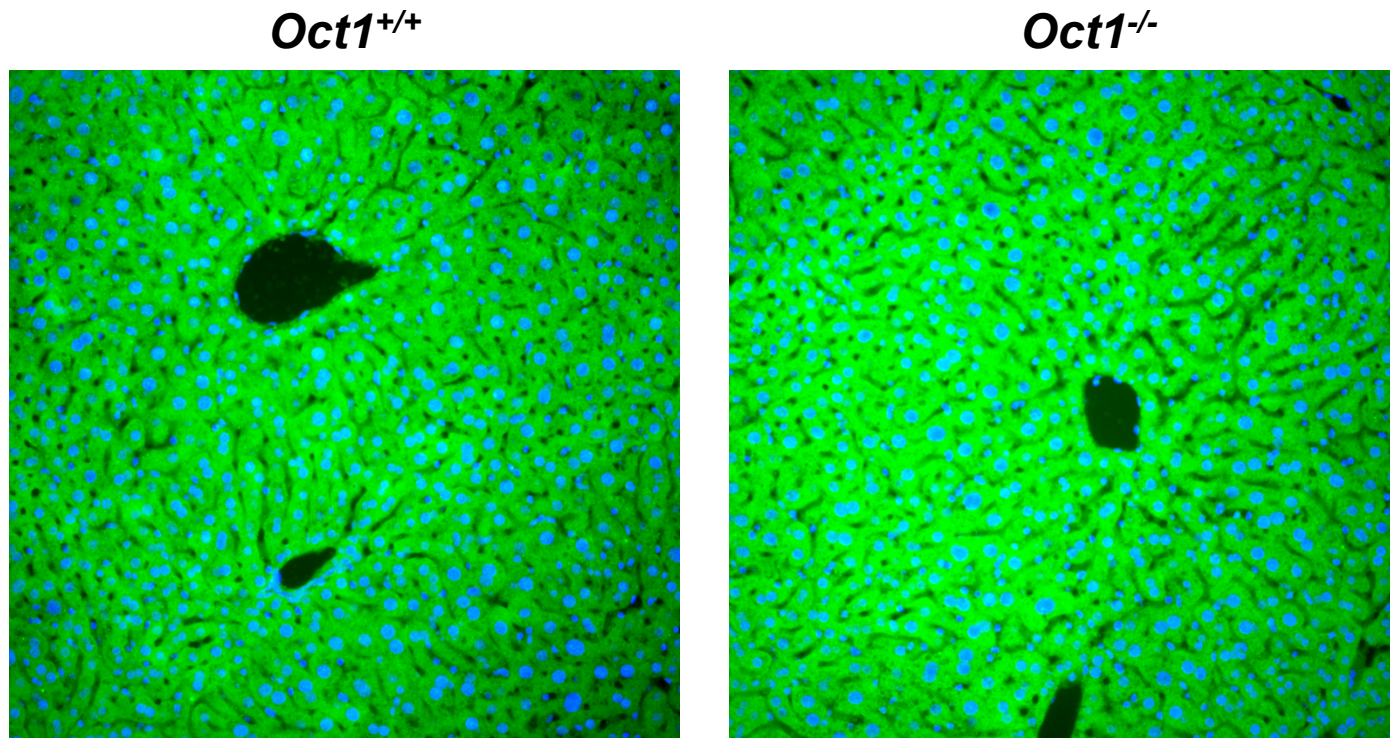

(G) Representative P-AMPK staining of *Oct1*<sup>+/+</sup> and *Oct1*<sup>-/-</sup> mouse livers. The *Oct1*<sup>-/-</sup> mouse livers showed a globally higher AMPK activation than wildtype mice.

**S2H**

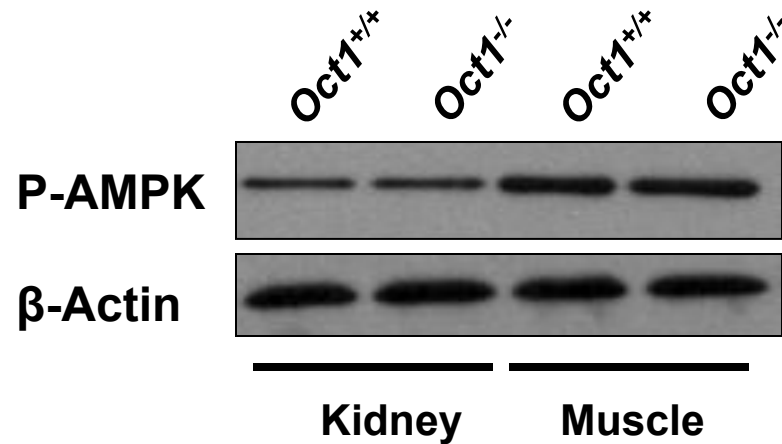

(H) AMPK activation in kidney and muscle of *Oct1*<sup>+/+</sup> and *Oct1*<sup>-/-</sup> mice. P-AMPK level in kidney and muscle showed no apparent difference between *Oct1*<sup>+/+</sup> and *Oct1*<sup>-/-</sup> mice.

S2I

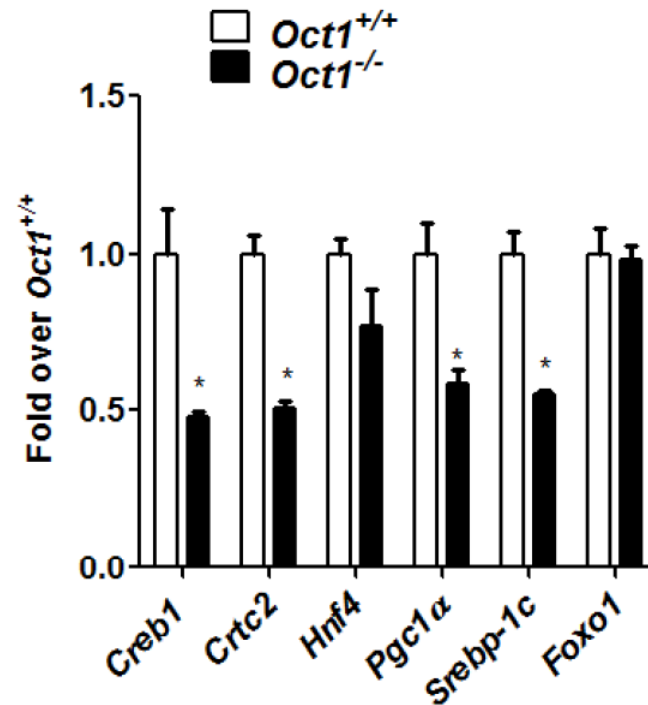

(I) mRNA expression level of a group of critical transcriptional factors in lipogenesis and gluconeogenesis. Creb1, cAMP responsive element binding protein 1; Crtc 2, CREB regulated transcription coactivator 2; Hnf4 $\alpha$ , hepatocyte nuclear factor 4,  $\alpha$ ; Pgc1 $\alpha$ , peroxisome proliferator-activated receptor gamma, coactivator 1  $\alpha$ ; Srebp-1c, sterol regulatory element binding protein 1c; Foxo 1, Forkhead box protein O1. The corresponding gene expression levels in WT were set as 1, n=6/genotype. Data are expressed as mean  $\pm$  SEM. \* $p < 0.05$ , \*\* $p < 0.01$ , \*\*\* $p < 0.001$ .

S2J

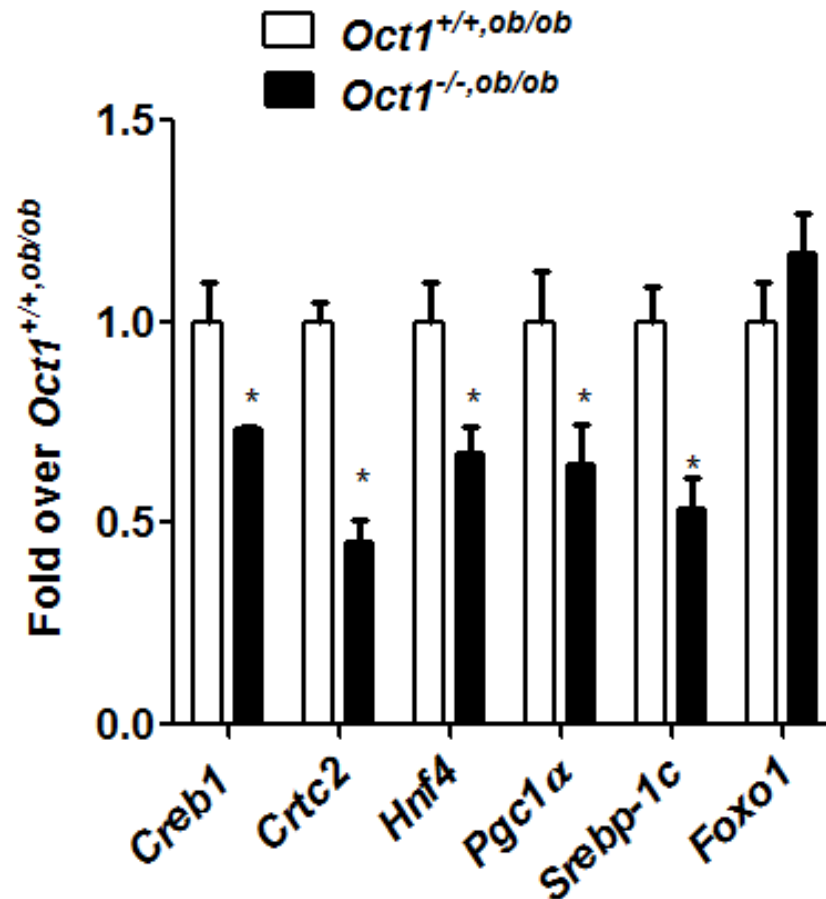

(J) Expression level of transcriptional factors relative to lipogenesis and gluconeogenesis in *Oct1*<sup>+/+, ob/ob</sup> and *Oct1*<sup>-/-, ob/ob</sup> mouse livers. Generally, these transcriptional factors were expressed lower in *Oct1*<sup>-/-, ob/ob</sup> mouse livers except *Foxo1* than those of *Oct1*<sup>+/+, ob/ob</sup> mice, similar to the observations of lean *Oct1*<sup>+/+</sup> and *Oct1*<sup>-/-</sup> mice.

# Figure S3

## S3A

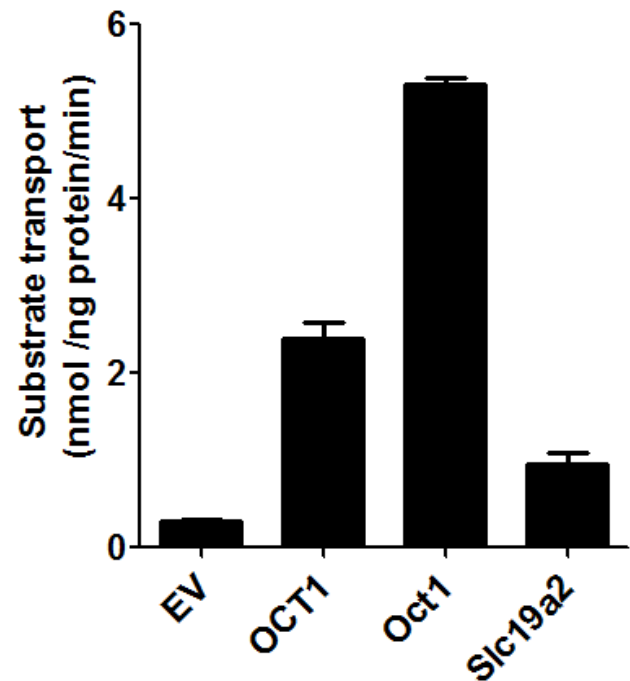

**Figures S3. Thiamine uptake by various thiamine transporters.** (A) Uptake of thiamine (100 nM) by human OCT1, mouse Oct1 and Slc19a2. 100nM [<sup>3</sup>H]thiamine and 90 nM cold thiamine were added to the uptake solution. Uptake was terminated at 10 min.

S3B

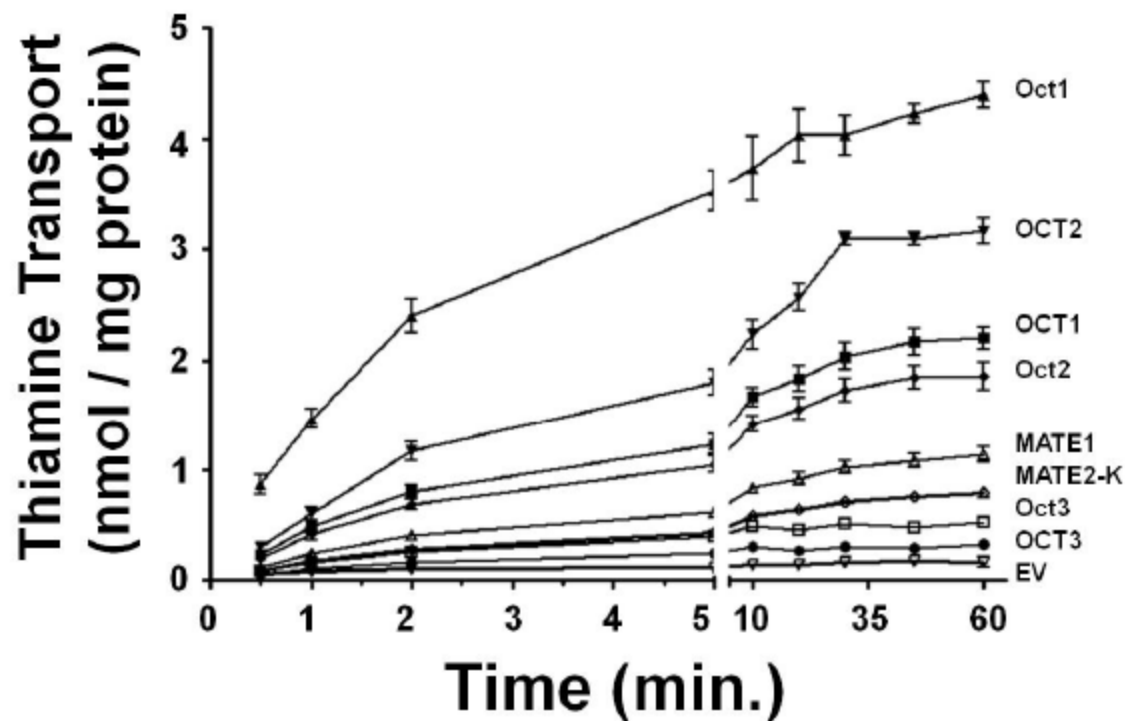

(B) Time course of [ $^3\text{H}$ ]thiamine uptake by human OCT1-3, MATE1 and MATE2-K, mouse Oct1-3.

## S3C

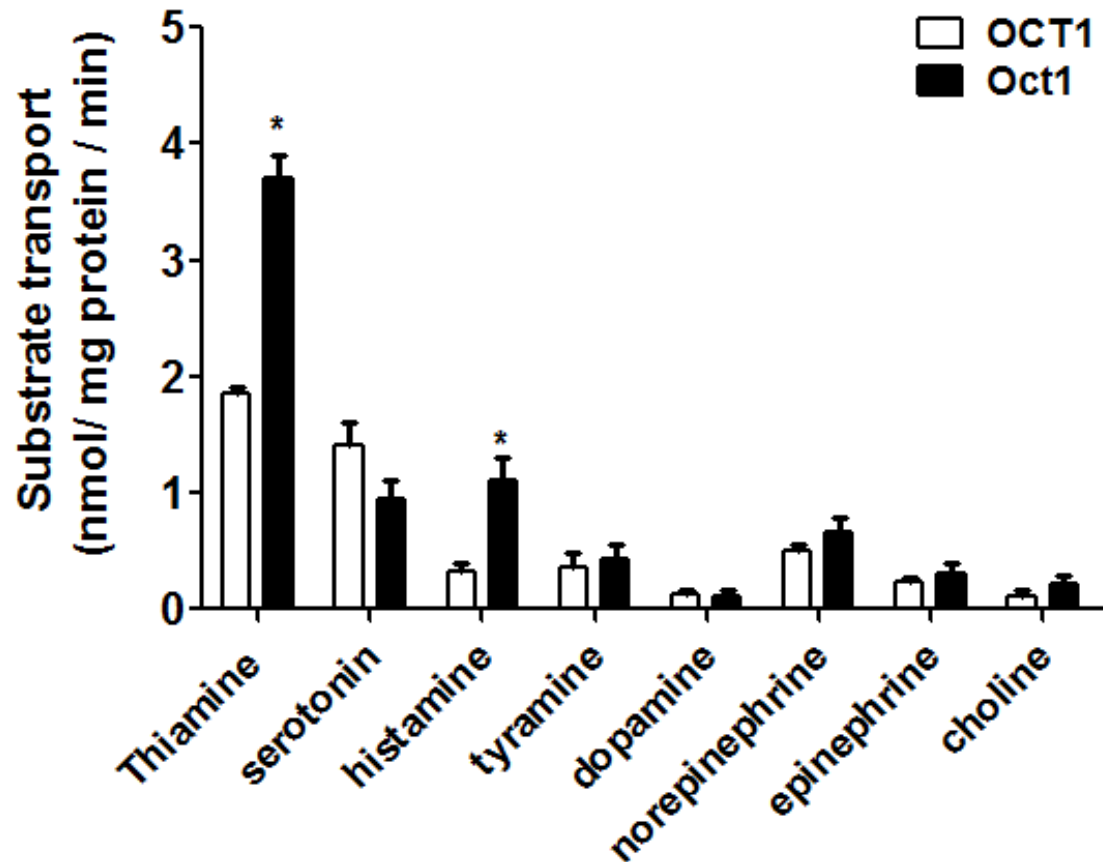

(C) Endogenous substrate uptake by HEK-OCT1 and HEK-Oct1 cells. Substrates were incubated for 10 min at 37 °C. Data are expressed as specific activity (activity of HEK293-OCT1 or Oct1 reference – activity of HEK293-EV, mean  $\pm$  SEM). \* $P < 0.05$ , compared to human OCT1.

# S3D

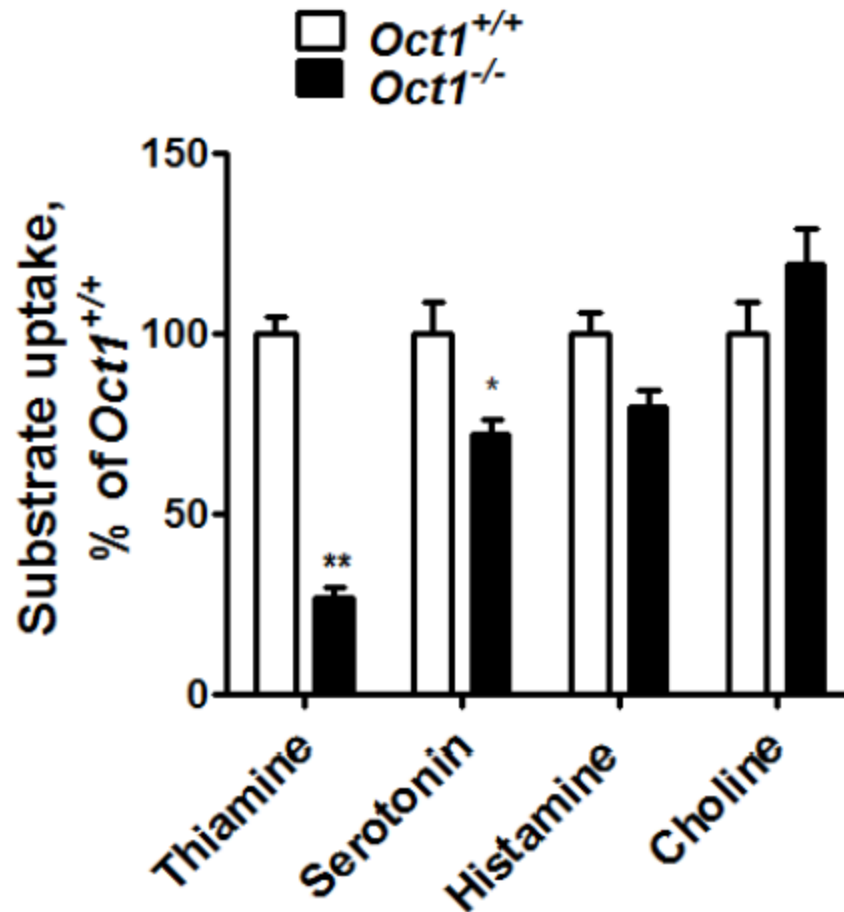

(D) Uptake of various endogenous amines by  $Oct1^{+/+}$  and  $Oct1^{-/-}$  primary hepatocytes. All data are mean  $\pm$  SEM. \* $p < 0.05$ , \*\* $p < 0.01$ , \*\*\* $p < 0.001$ .

# Figure S4

## S4A

*Oct1*<sup>-/-</sup>  
TPP  
MA: 3172068

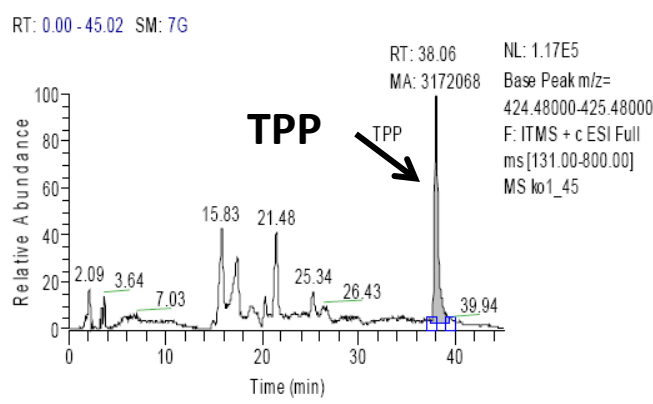

*Oct1*<sup>+/+</sup>  
TPP  
MA: 6839842

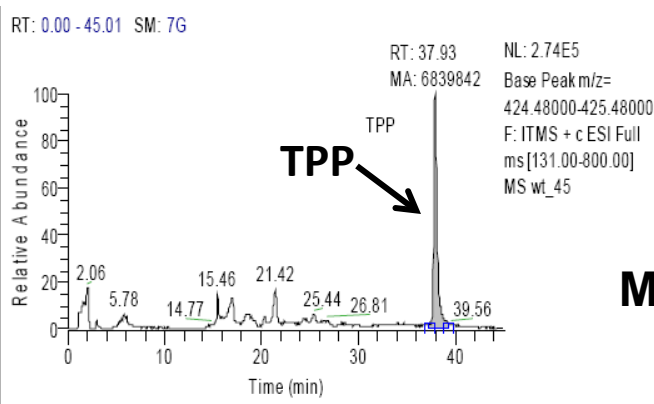

*Oct1*<sup>-/-</sup>  
TMP  
MA: 622024

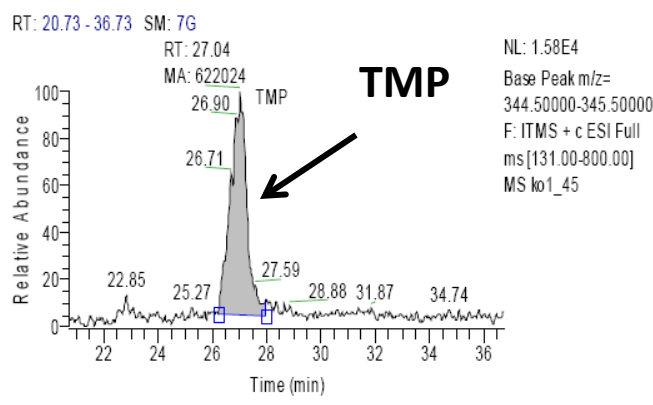

*Oct1*<sup>+/+</sup>  
TMP  
MA: 1463071

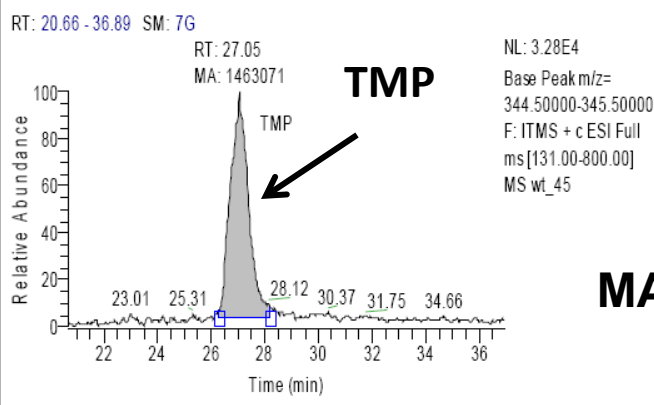

**Figure S4. Role of OCT1 in thiamine disposition.** (A) Quantification of TMP and TPP in mouse liver extracts from *Oct1*<sup>+/+</sup> and *Oct1*<sup>-/-</sup> mice (n=6/genotype). Representative LC/MS spectrum picture. MA, measured area.

S4B

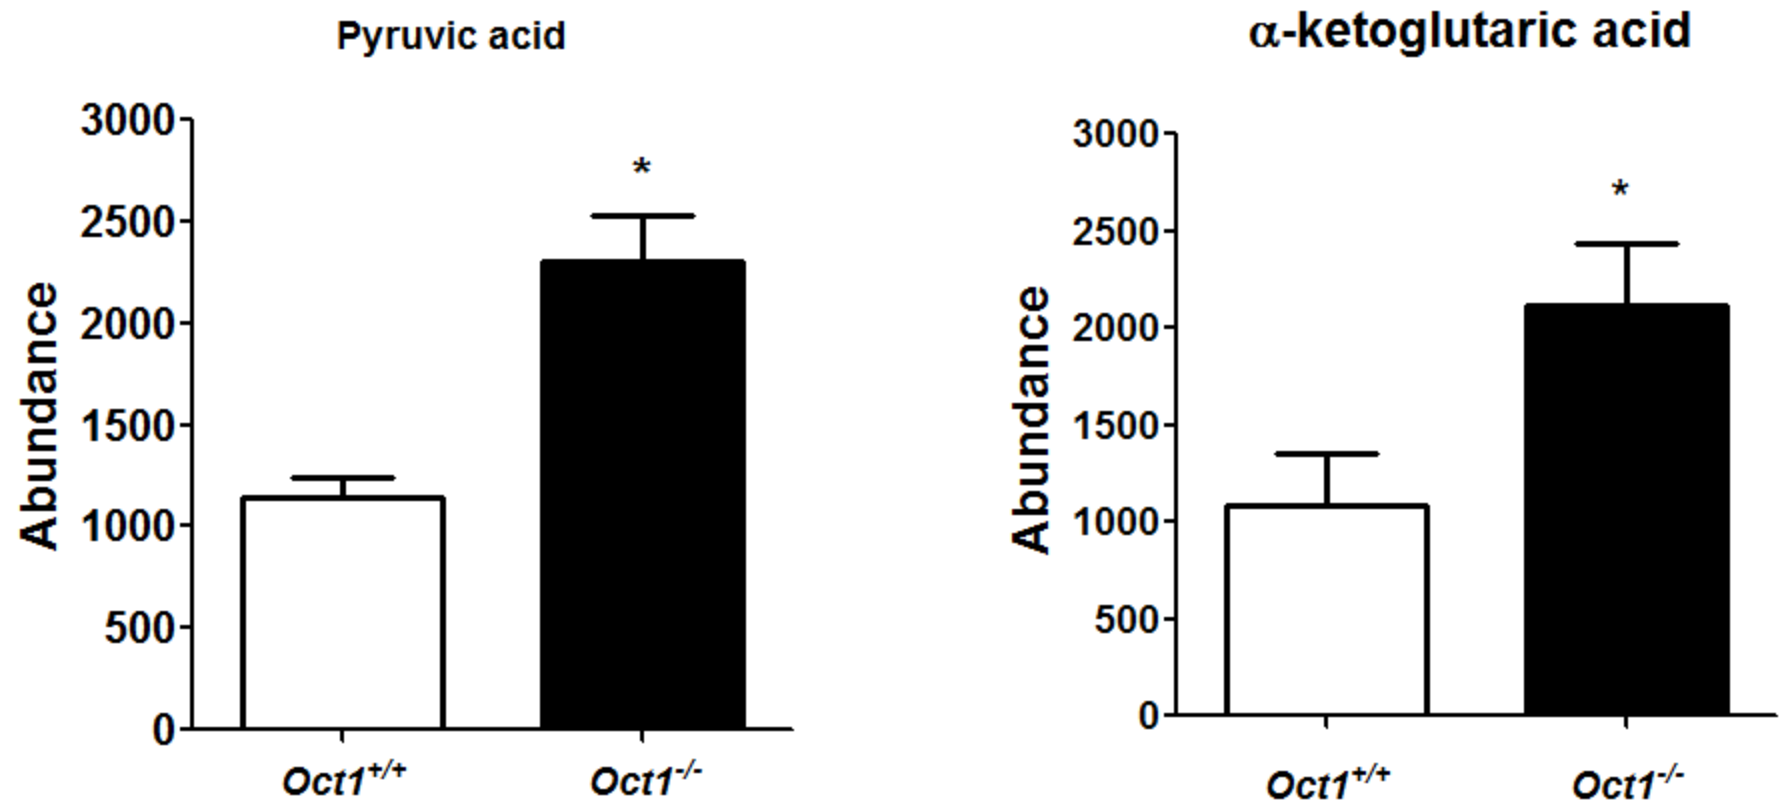

(B) Levels of pyruvic acid and α-ketoglutaric acid in *Oct1*<sup>+/+</sup> and *Oct1*<sup>-/-</sup> mice. The major substrates, pyruvic acid and α-ketoglutaric acid, of TPP-associated major enzymes (PDH and OGDH) were measured with LC-MS/MS. The levels of pyruvic acid and α-ketoglutaric acid in the were elevated in the serum of *Oct1*<sup>-/-</sup> mice, consistent with TPP insufficiency in the livers of *Oct1*<sup>-/-</sup> mice. 3 gender (male) and age (16- to 20-week) matched mice from each genotype were used in the study.

## S4C

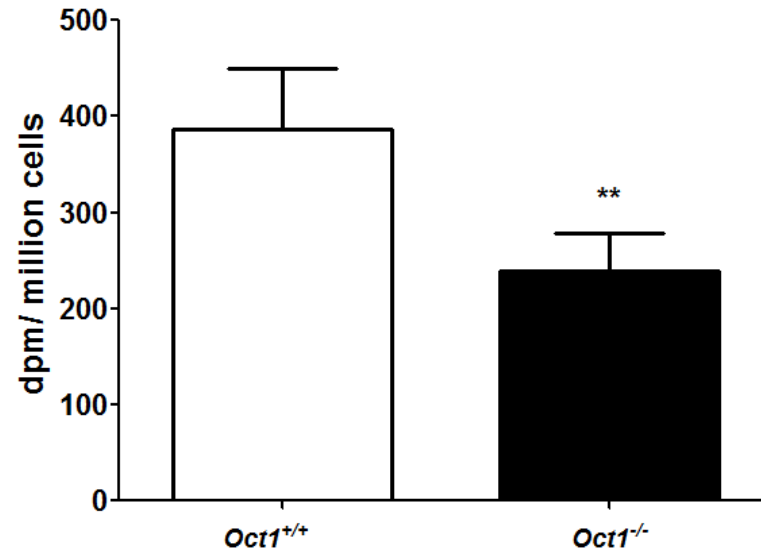

(C) Glycolysis rate in *Oct1*<sup>+/+</sup> and *Oct1*<sup>-/-</sup> primary hepatocytes. D- [U-<sup>14</sup>C]-Glucose was added to the DME H21 medium (4g/L, 22.2mM). The [<sup>14</sup>C]CO<sub>2</sub> gases were collected on the top of the dish. After two hours incubation, the radioactivity of the filter paper associated with [<sup>14</sup>C]CO<sub>2</sub> was counted. The final production from the glucose oxidation was measured by the release of the [<sup>14</sup>C]CO<sub>2</sub>. The radioactivity from *Oct1*<sup>-/-</sup> hepatocytes was about 36% less than that from the wildtype hepatocytes. 3 gender (male) and age (20-week)-matched mice from each genotype were used in the study.

## S4D

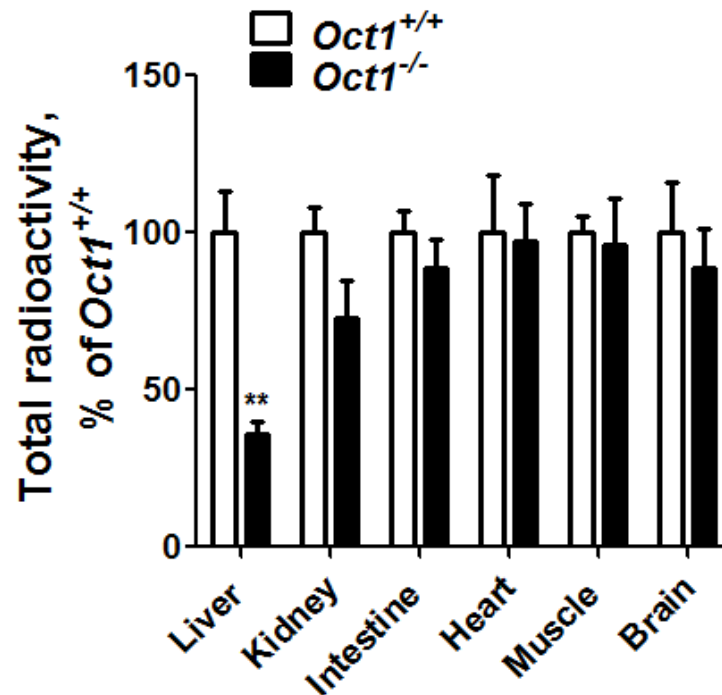

(D) Total [<sup>3</sup>H]thiamine radioactivity in various tissues from *Oct1*<sup>+/+</sup> and *Oct1*<sup>-/-</sup> mice one hour after administration of an intravenous dose of [<sup>3</sup>H] thiamine. Data were normalized to WT in the corresponding tissues, which were set at 100%.

## S4E

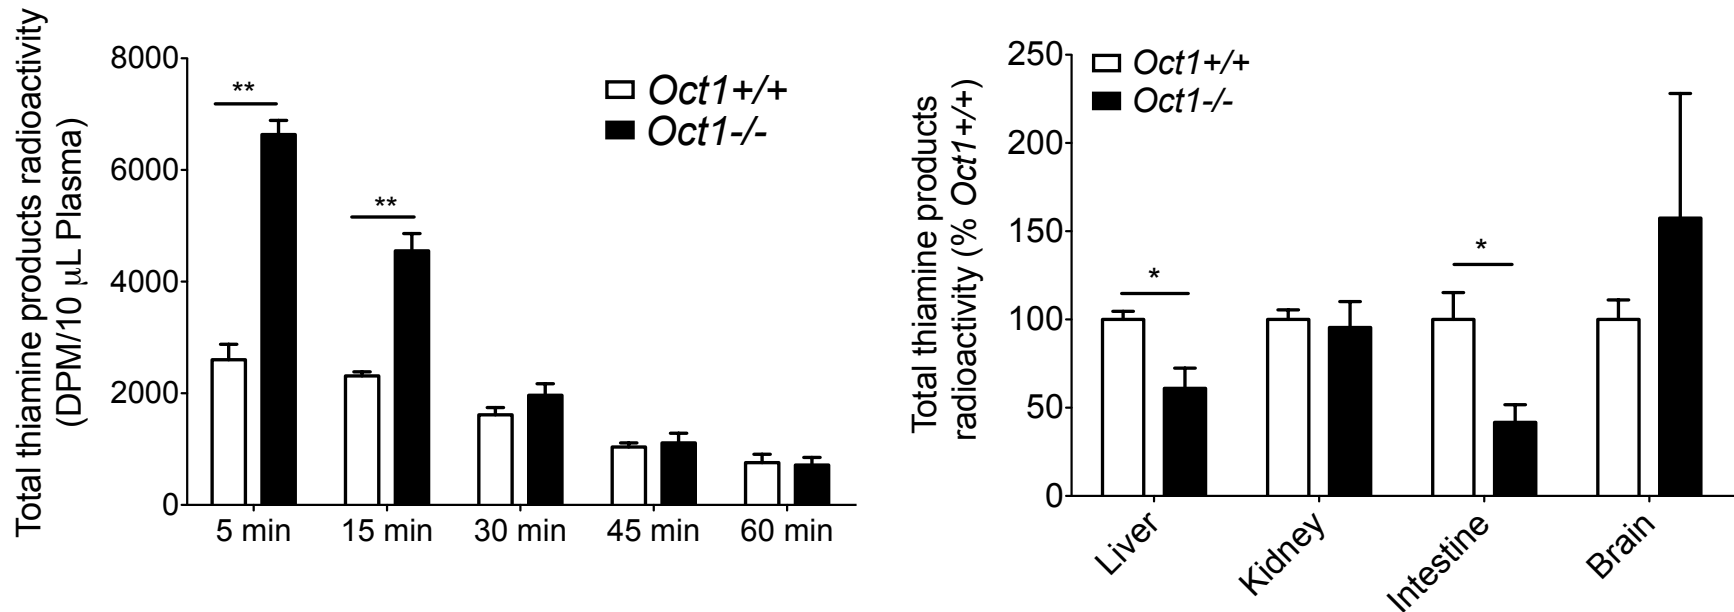

(E) *Oct1*<sup>+/+</sup> mice were treated with thiamine (2mg/kg) intraperitoneal (i.p.) injection. Age-matched C57BL/6J mice (*Oct1*<sup>+/+</sup>, N=3; *Oct1*<sup>-/-</sup>, N=4) were used in this study. Tissue accumulation of thiamine were performed after 1 hour dosing.

## S4F

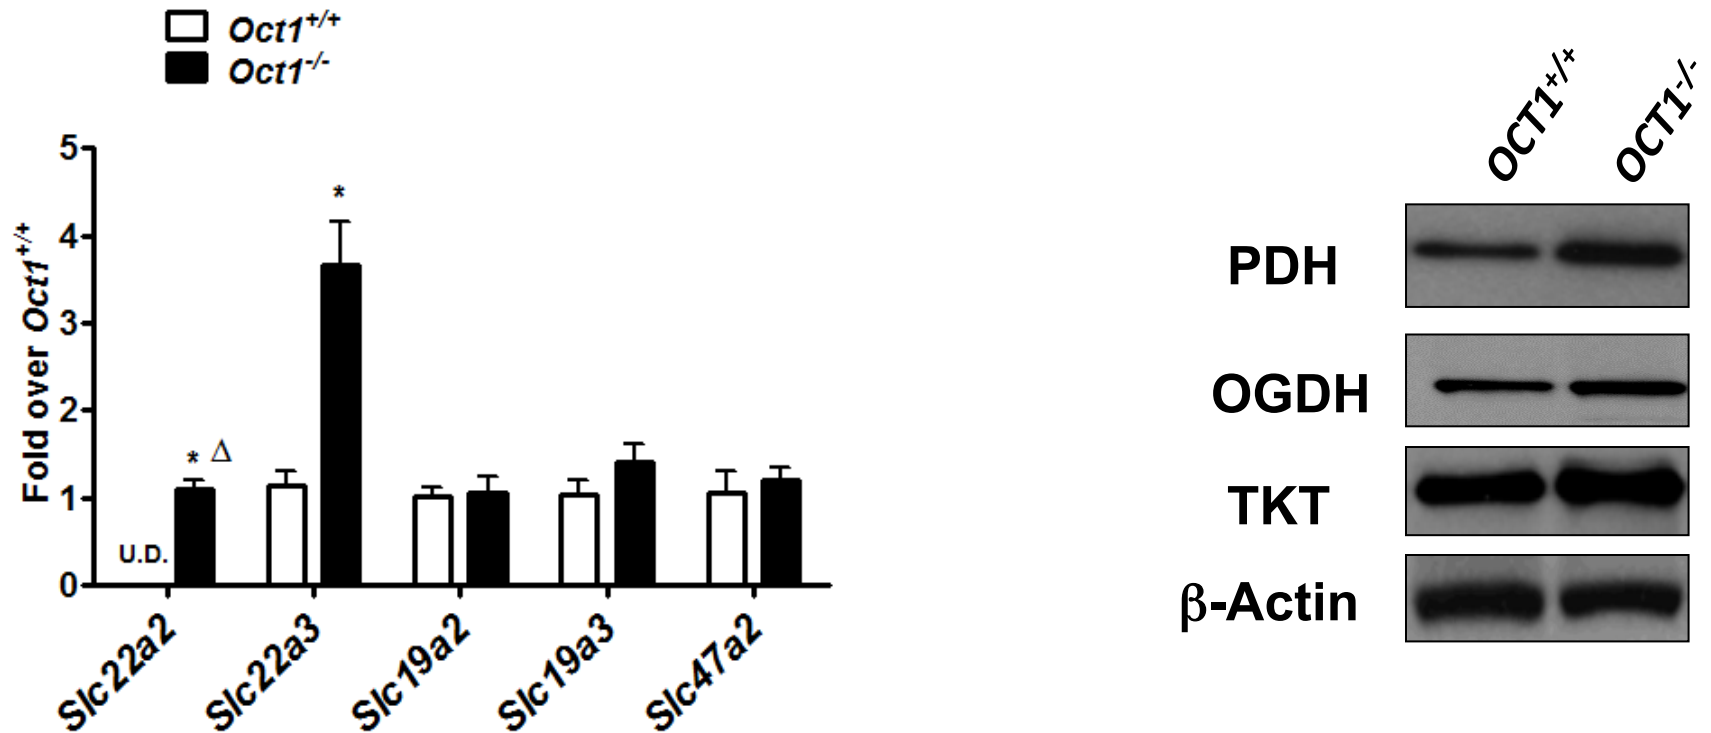

(F) *Left:* Expression levels of thiamine transporters in the liver of *Oct1*<sup>-/-</sup> mice. U.D., undetected;  $\Delta$ , *Oct2* mRNA of KO mice was stimulated to the similar level of *Oct3* in WT. \**P* < 0.05, compared to the WT mice. *Right:* Regulations of enzymes using TPP as co-factor. PDH, pyruvate dehydrogenase subunit; OGDH,  $\alpha$ -ketoglutarate dehydrogenase; TKT, transketolase.

**S4G**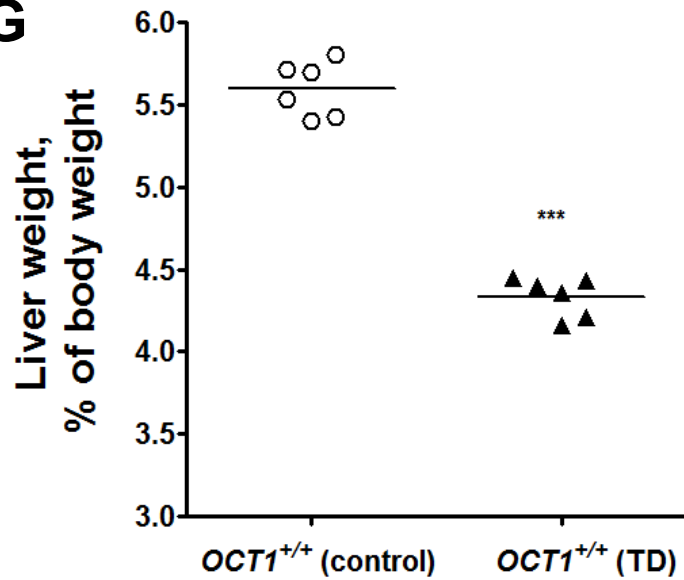**S4H**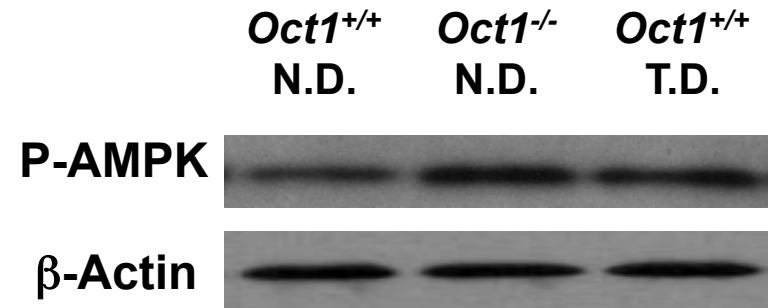

(G) Effect of dietary thiamine levels on liver weight (normalized to body weight) in pair-fed wildtype mice fed a control and a thiamine deficient (TD) diet (n=6 mice/group, \*\*\**P* < 0.001). (H) AMPK activation in livers from *Oct1*<sup>+/+</sup> (Normal Diet, N.D.), *Oct1*<sup>-/-</sup> (Normal Diet, N.D.) and *Oct1*<sup>+/+</sup> (Thiamine Deficient Diet, TD). Thiamine deficiency resulted in similar AMPK activation in wildtype mouse livers as in *Oct1*<sup>-/-</sup> mouse livers. 3 gender (male) and age (20-week)-matched mice from each genotype were used in the study.

# Figure S5

## S5A

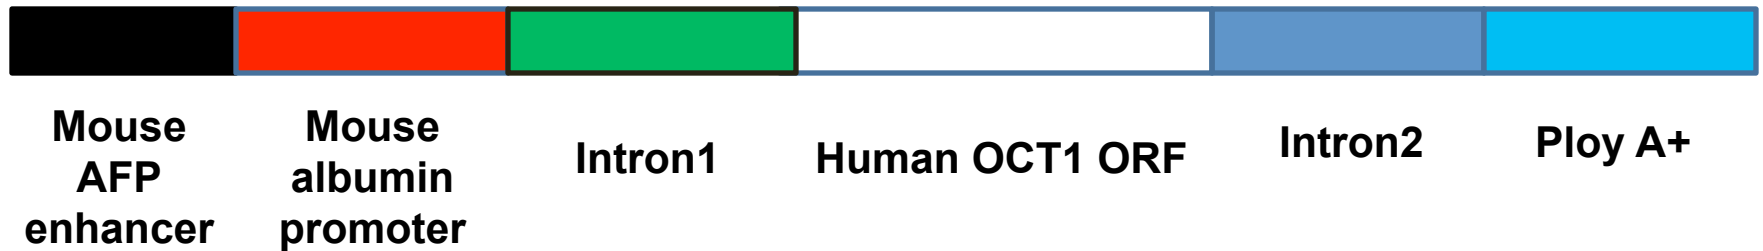

## S5B

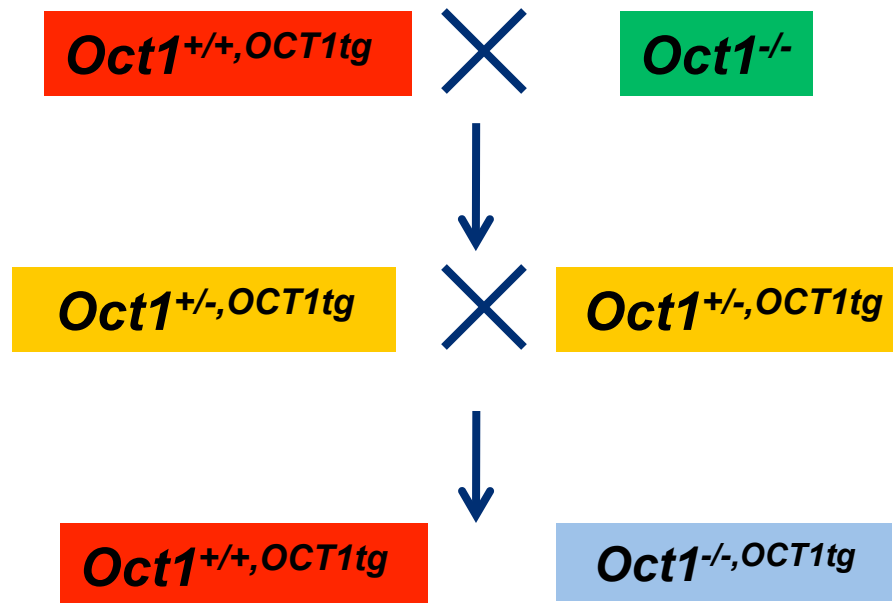

**Figure S5. *OCT1* transgenic mice.** (A) Construct of liver-specific expression human OCT1. (B) The breeding strategy for humanized OCT1 mice under *Oct1*<sup>-/-</sup> background.

**S5C**

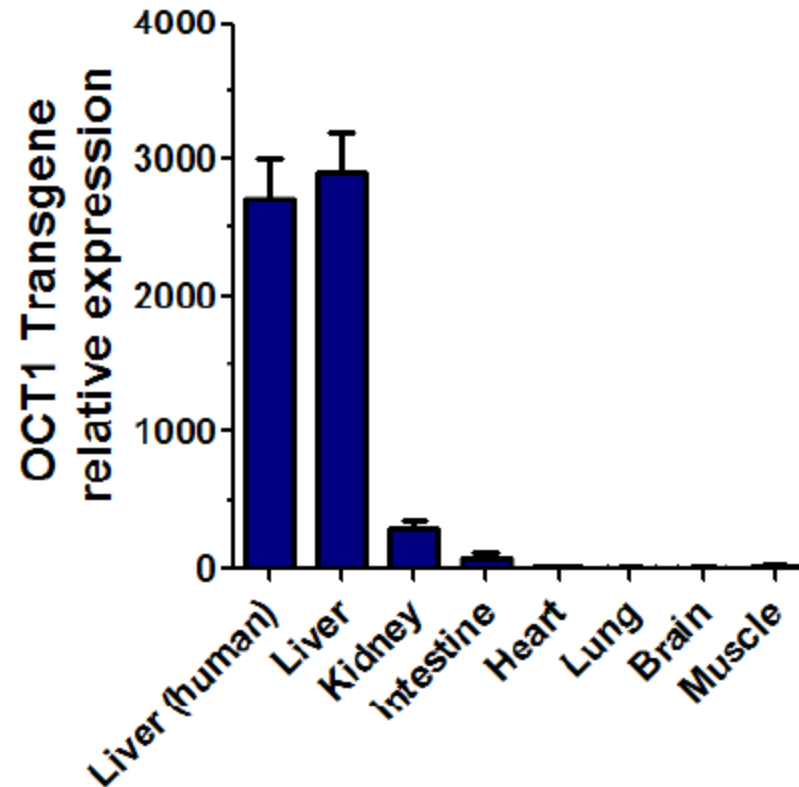

(C) Human *OCT1* mRNA expression levels in various tissues in *Oct1*<sup>+/+</sup>, *OCT1*<sup>tg</sup> mice and human liver, relative to OCT1 expression level in mouse lung, set = 1.

**S5D**

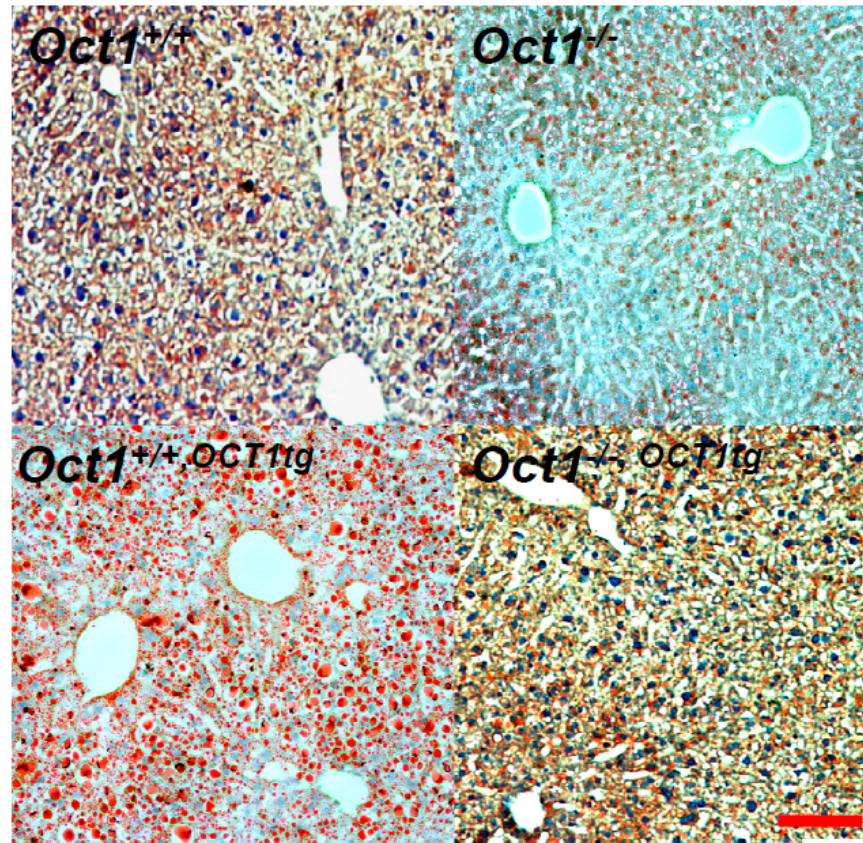

(D) Representative ORO staining of livers sections from *Oct1*<sup>+/+</sup>, *Oct1*<sup>-/-</sup>, *Oct1*<sup>+/+</sup>, *OCT1*<sup>tg</sup> and *Oct1*<sup>-/-</sup>, *OCT1*<sup>tg</sup> mice fed normal diet. Scale bar, 25  $\mu$ m.

S5E

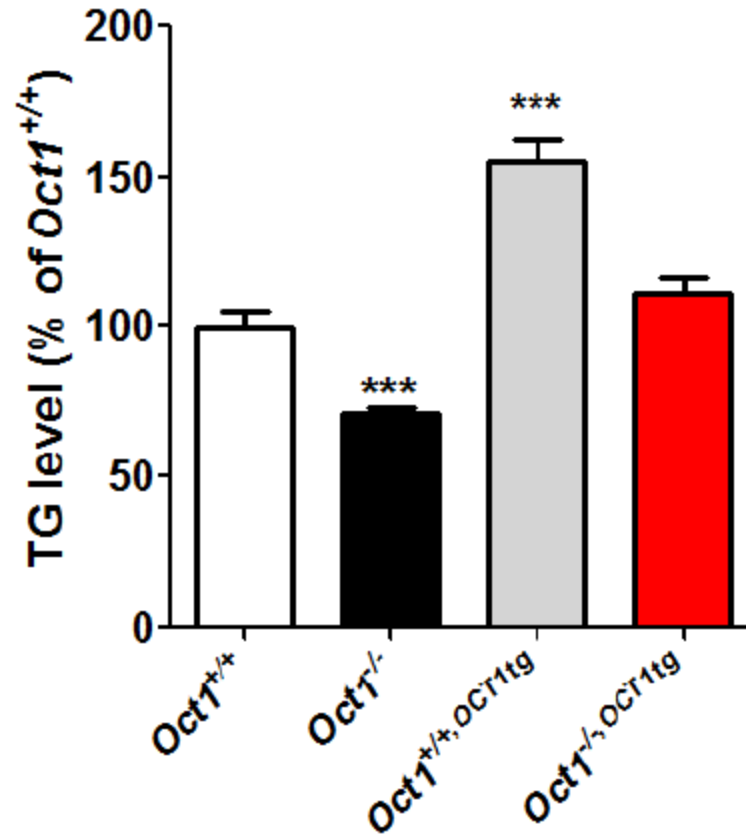

(E) TG levels in livers from Oct1<sup>+/+</sup>, Oct1<sup>-/-</sup>, Oct1<sup>+/+</sup>, OCT1tg and Oct1<sup>-/-</sup>, OCT1tg mice.

S5F

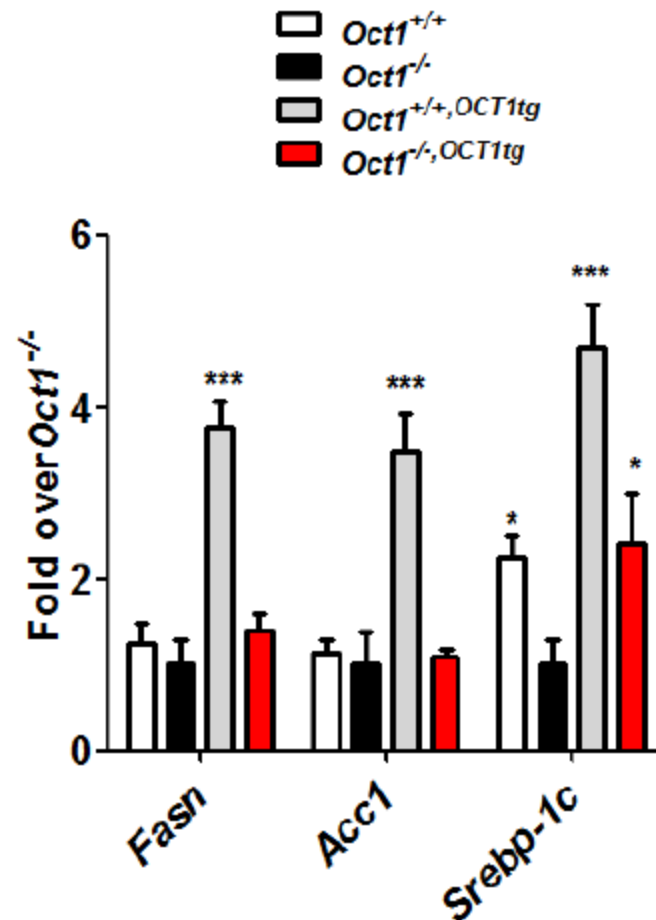

(F) mRNA expression levels of the key lipid metabolism transcription factor *Srebp1-c* and fatty acid synthesis enzymes, *Acc1* and fat acid synthase (*Fasn*), in 4 mouse strains. Expression levels were normalized to  $Oct1^{-/-}$  mice.

**S5G**

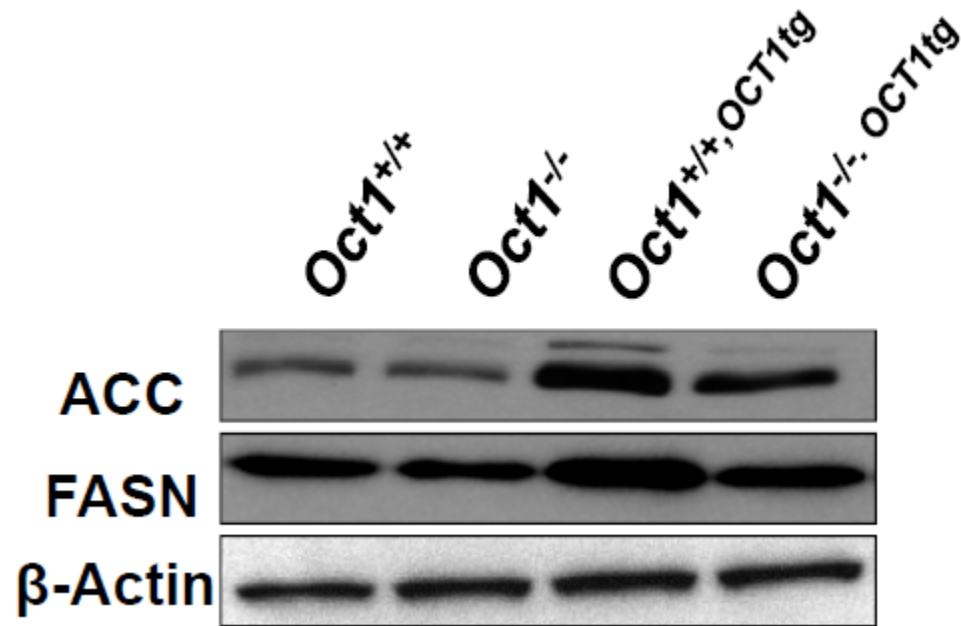

(G) Western blot of ACC and FASN to confirm the protein expression in 4 mouse strains.

## S5H

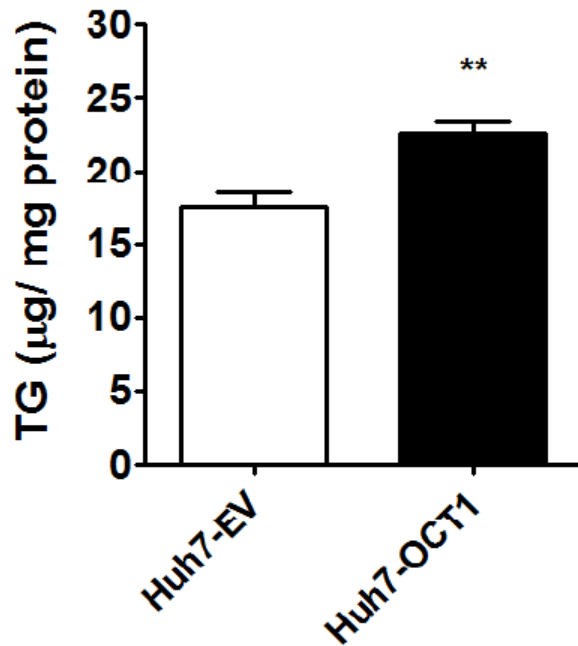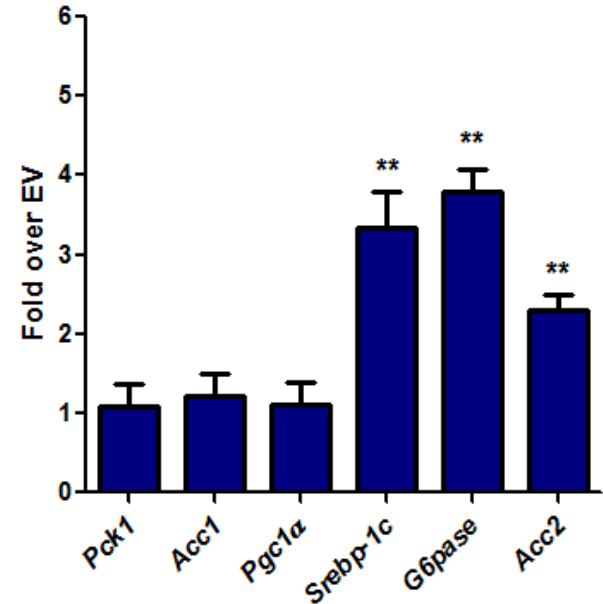

(H) Over-expressing human OCT1 in human hepatocarcinoma cell lines, Huh7. Left: TG levels in pcDNA5-EV and pcDNA5-OCT1 transfected Huh7 cells. All data are mean  $\pm$  SEM. \* $p < 0.05$ , \*\* $p < 0.01$ , \*\*\* $p < 0.001$ . Right: Critical lipid metabolism and gluconeogenesis gene regulation in human OCT1-transfected Huh7 cells. \*\* $P < 0.01$ , compared with the expression levels of corresponding genes in EV-transfected Huh7.

**S5I**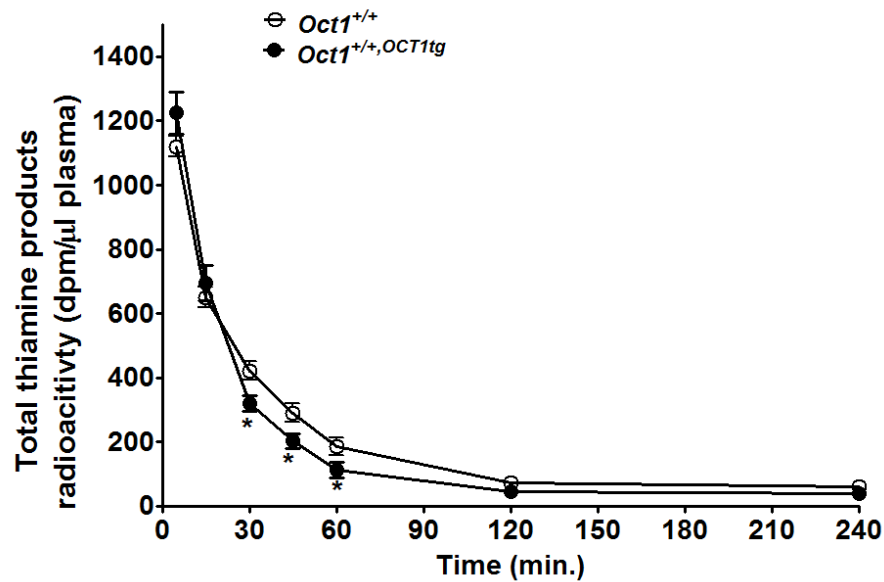**S5J**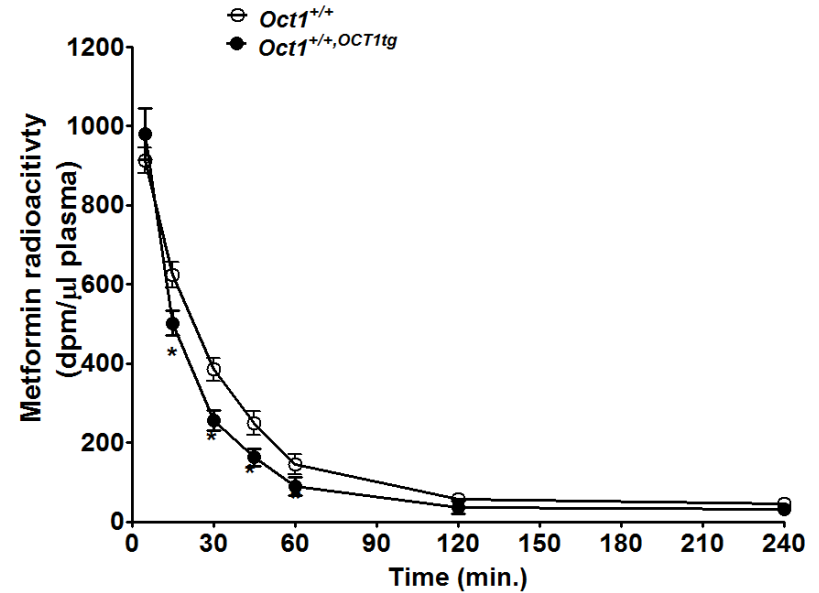

(I and J)  $Oct1^{+/+}$  and  $Oct1^{+/+,OCT1tg}$  mice were given thiamine or metformin intravenously. In  $Oct1^{+/+,OCT1tg}$  mice, lower plasma levels between 30 min to 60 min or 20 min to 60 min, respectively, were observed in comparison to plasma levels in  $Oct1^{+/+}$ .

**S5K**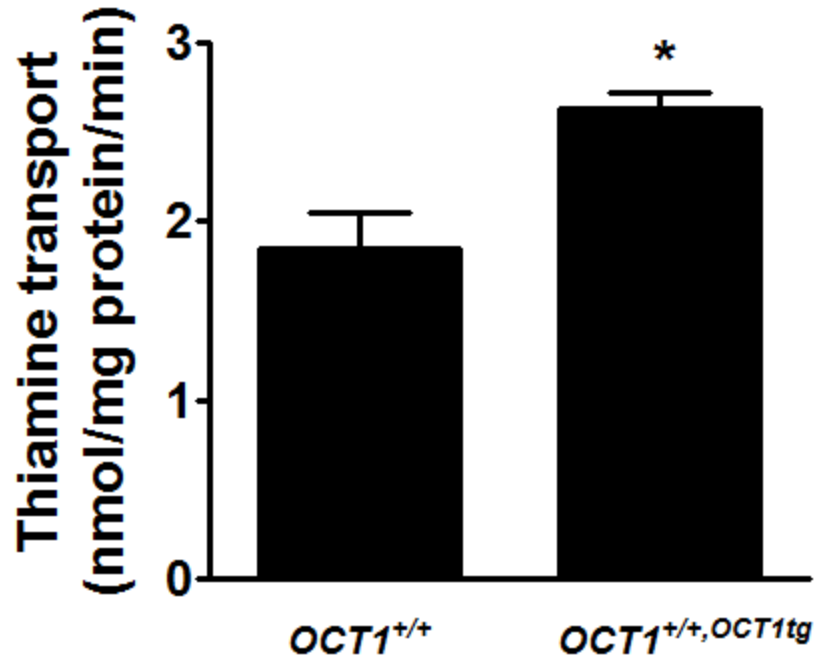**S5L**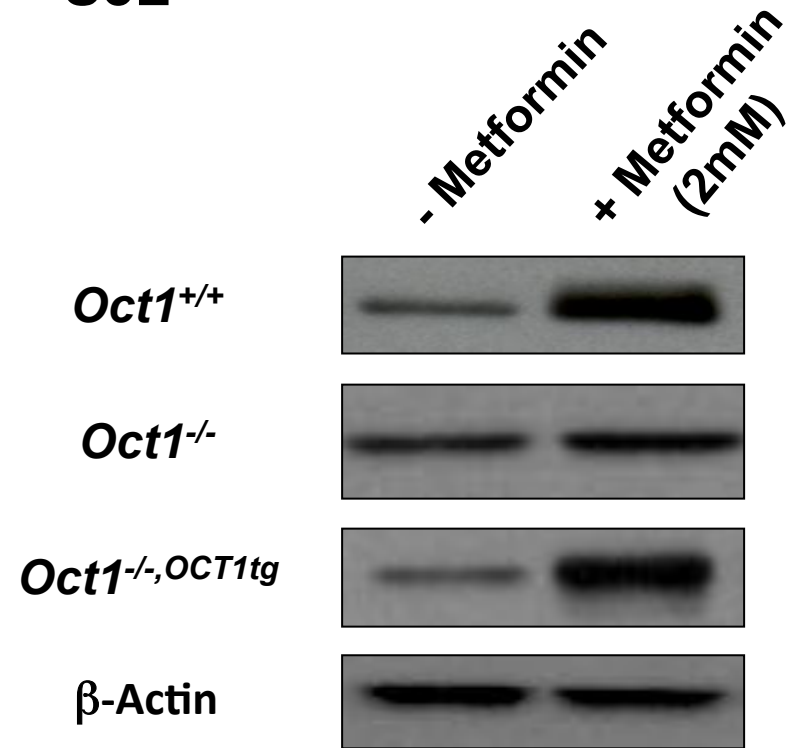

(K) Thiamine transport by *Oct1*<sup>+/+</sup> and *Oct1*<sup>+/+</sup>,*OCT1*<sup>tg</sup>. Human OCT1 transgenic hepatocyte showed more than 32% higher uptake rate than that of *Oct1*<sup>+/+</sup>. (L) Expression of human OCT1 in *Oct1*<sup>-/-</sup>,*OCT1*<sup>tg</sup> rescue the AMPK activation in the primary hepatocytes. Primary hepatocytes were cultured in the high glucose DME H21 medium. After fasting 16 hours in DME H21 medium with antibiotics without FBS, cells were treated with or without metformin.

## S5M

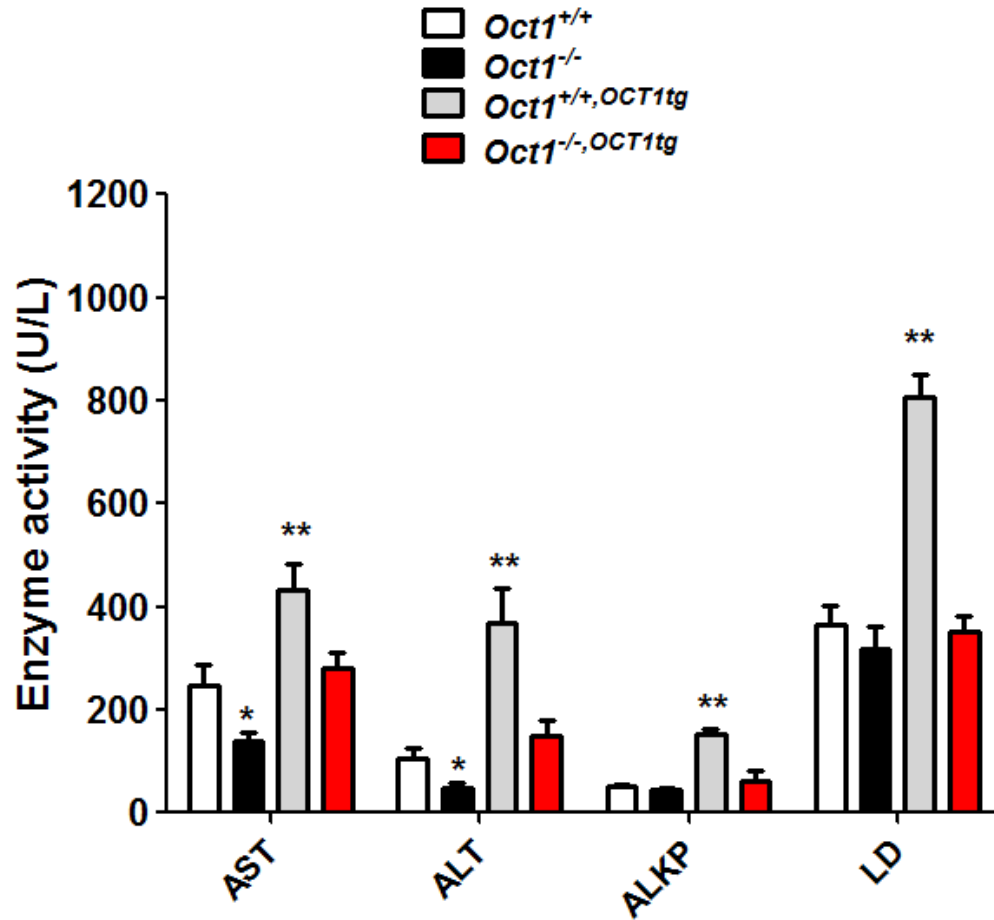

(M) Plasma levels of liver function enzymes in  $Oct1^{+/+}$ ,  $Oct1^{-/-}$ ,  $Oct1^{+/+}, OCT1tg$  and  $Oct1^{-/-}, OCT1tg$  mice. \* $P < 0.05$ , \*\* $P < 0.01$  compared to the  $Oct1^{+/+}$ .  $n = 6/\text{genotype}$ .

## S5N

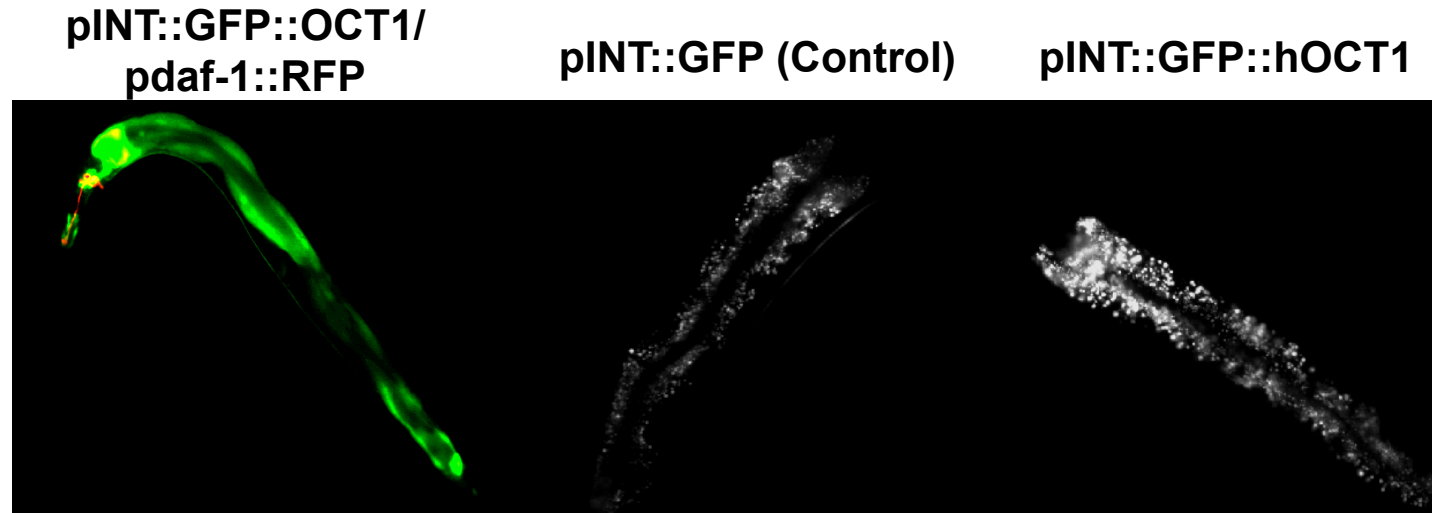

(N) Effect of expression of hOCT1 in the *C. elegans* with intestine-specific expression promoter fused with GFP. Representative images are from L4 WT animals which were co-injected with pINT::GFP::OCT1 and pdaf-1-RFP. Representative images of Nile Red-stained WT and hOCT1-transgenic animals in intestine illustrated as black and white.

# Figure S6

## S6A

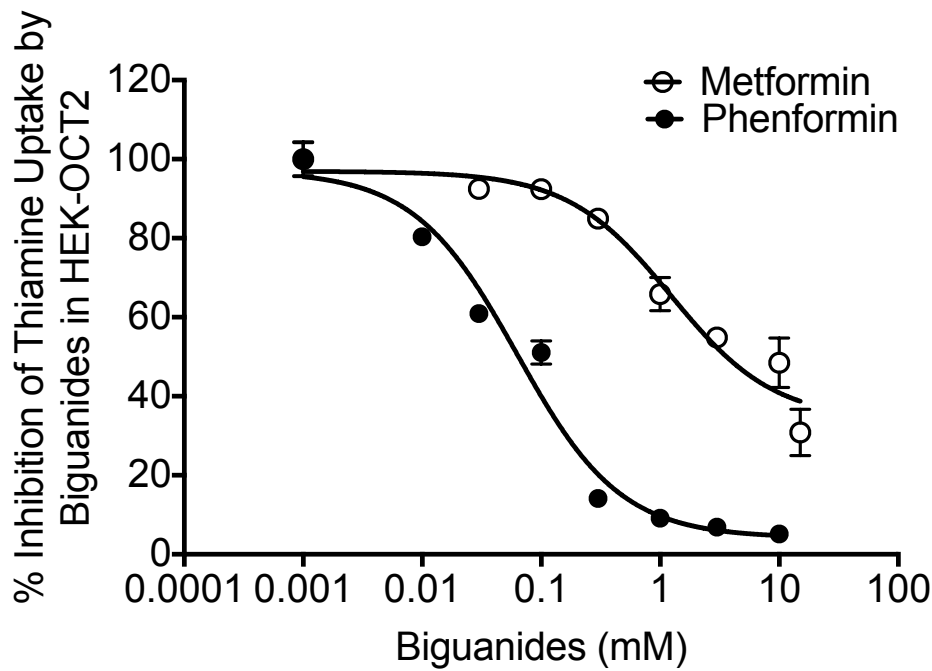

**Figure S6. (A) Metformin and phenformin inhibition of OCT2-mediated thiamine uptake in HEK293 transfected cells.** Phenformin is more potent in thiamine uptake by OCT2 transfected cells ( $IC_{50}$ =87  $\mu$ M) compared to metformin ( $IC_{50}$ =1.4 mM)

S6B

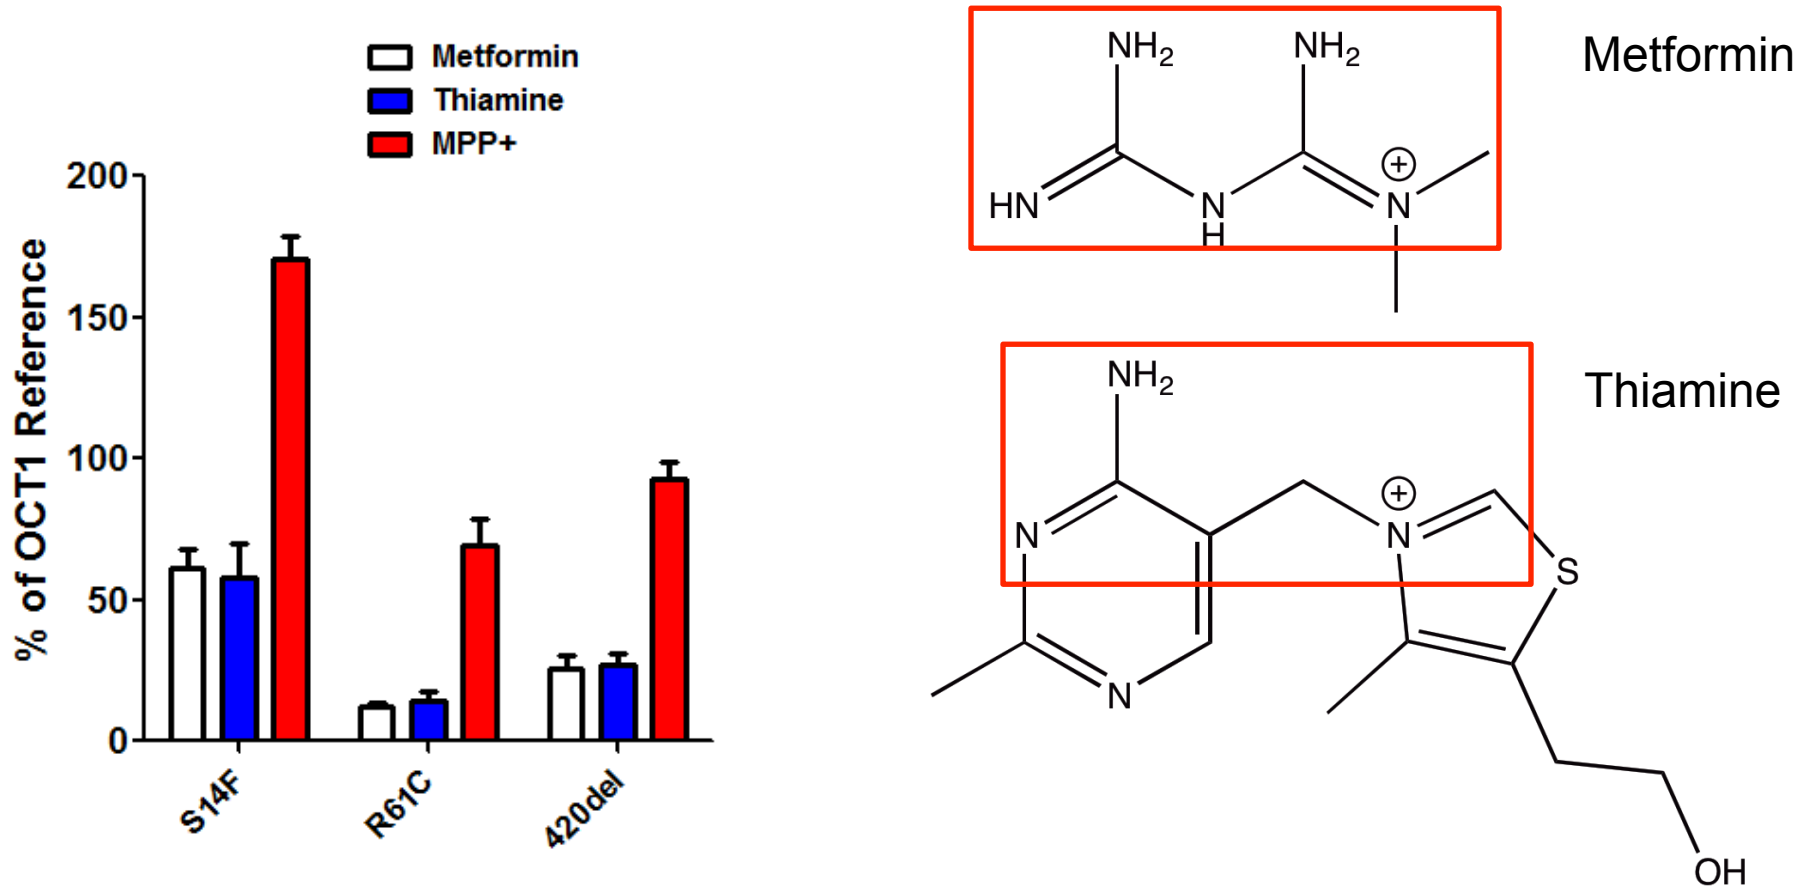

(B) **Interactions of amines with OCT1.** MPP+ uptake pattern among cells expressing OCT1 genetic variants S14F, R61C and 420del. Metformin and thiamine showed different uptake rates from MPP+ with these OCT1 genetic variants. Right panel: Thiamine (lower) and metformin (upper) share structural similarity highlighted in the red frame.

S6C

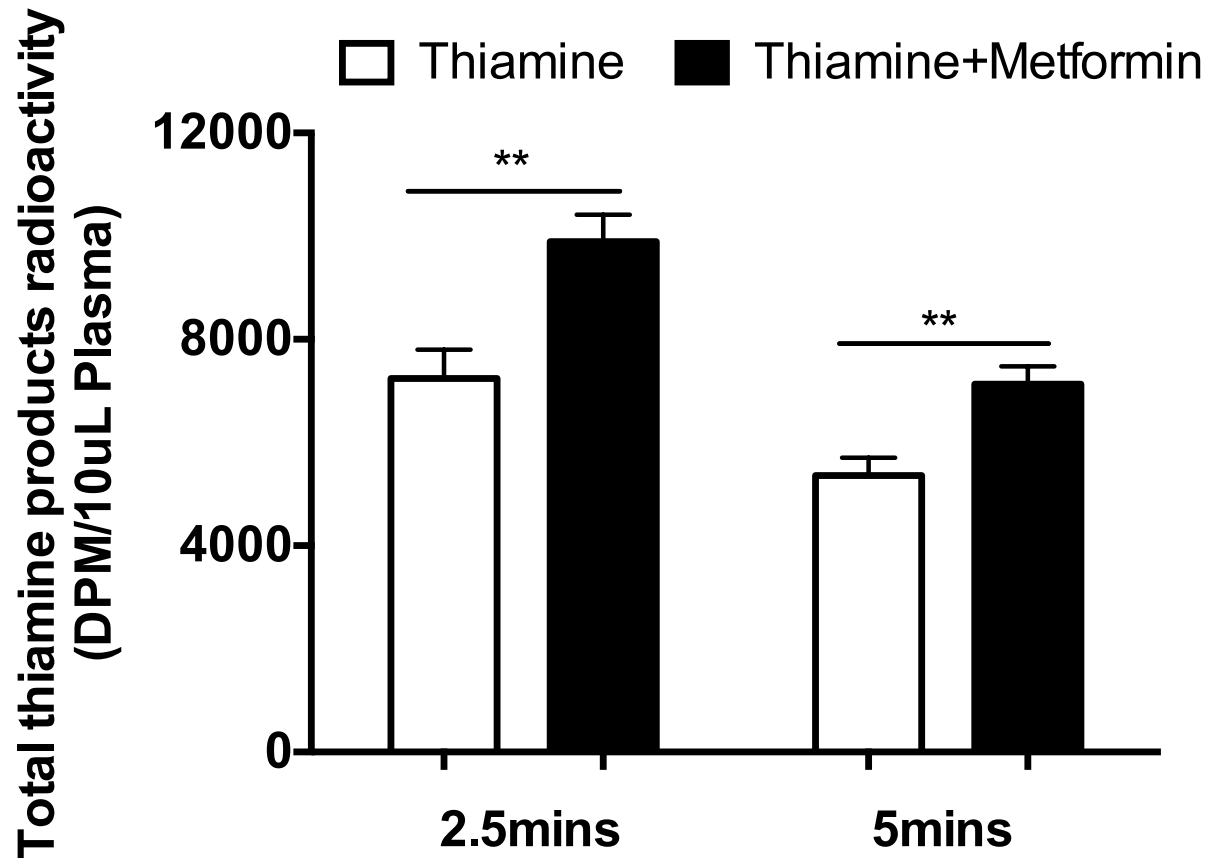

(C) Total radioactivity of [<sup>3</sup>H]thiamine products in plasma obtained from *Oct1*<sup>+/+</sup> mice treated with [<sup>3</sup>H]thiamine (2 mg/kg) only or [<sup>3</sup>H]thiamine (2 mg/kg) plus metformin (50 mg/kg) intravenously, \*p < 0.05, \*\*p < 0.01, \*\*\*p < 0.001, compared to *Oct1*<sup>+/+</sup> mice (n=6).

## S6D

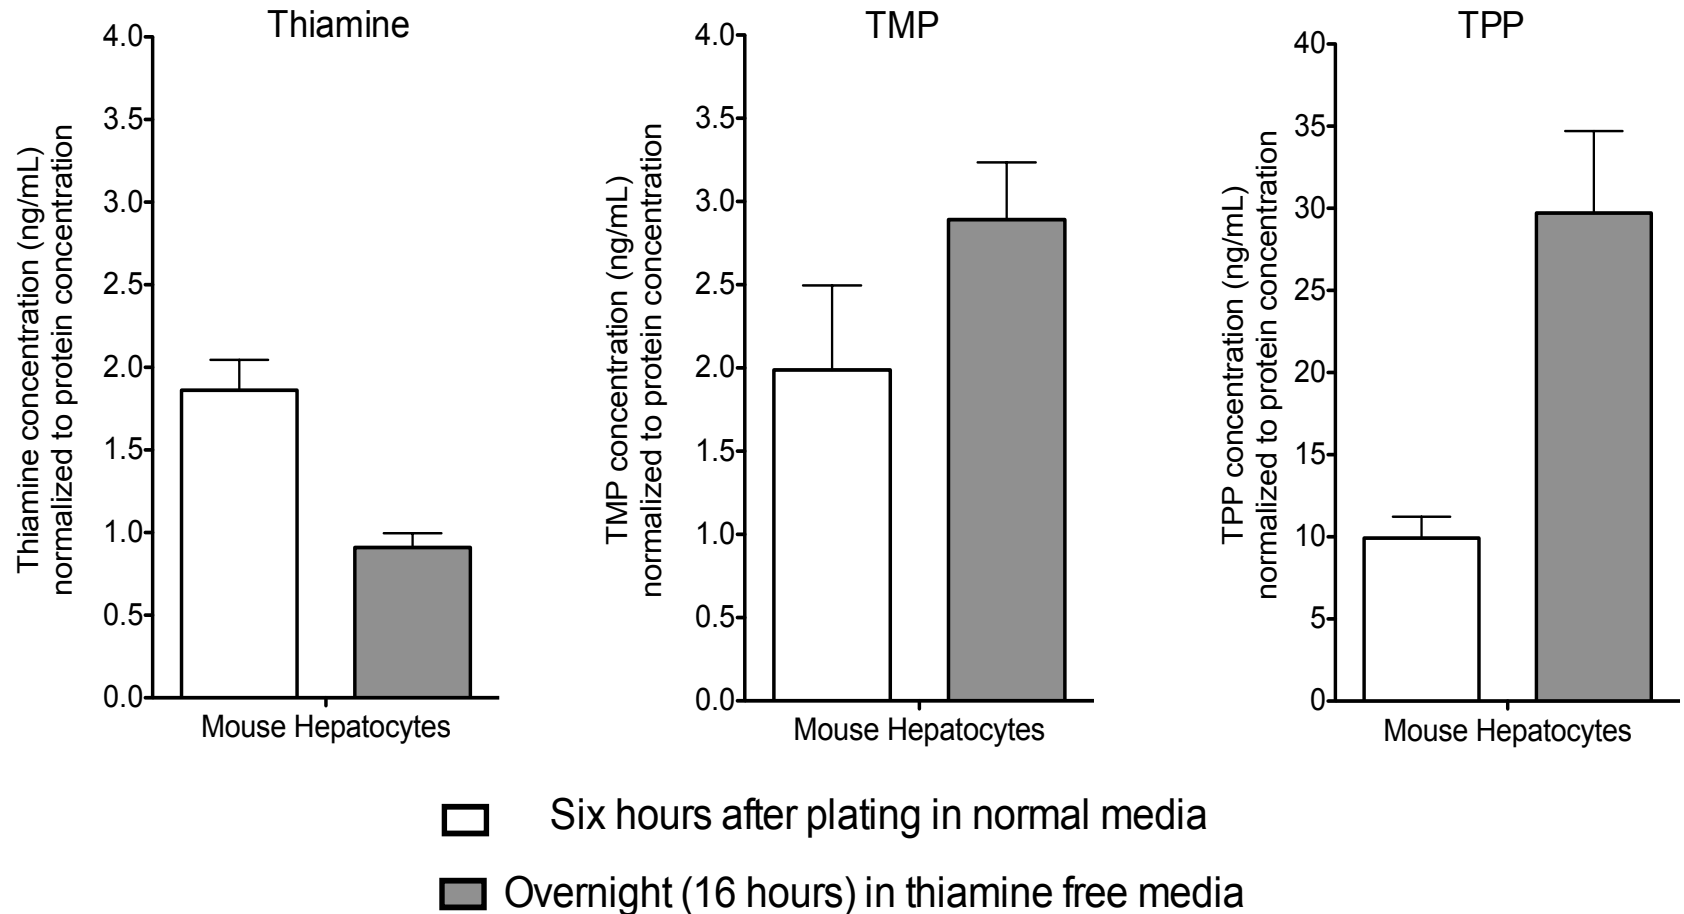

□ Six hours after plating in normal media  
■ Overnight (16 hours) in thiamine free media

(D) Thiamine, thiamine monophosphate (TMP) and thiamine pyrophosphate (TPP) levels in mouse hepatocytes 16 hours after incubation with thiamine-free media (gray bars). Sixteen hours after thiamine depletion, thiamine levels decreased by ~50%; however, TMP levels and notably TPP levels increased substantially (from  $9.9 \pm 3.2$  ng/ml at baseline to  $30 \pm 12$  ng/ml 16 hours after incubation in thiamine free media).

S6E

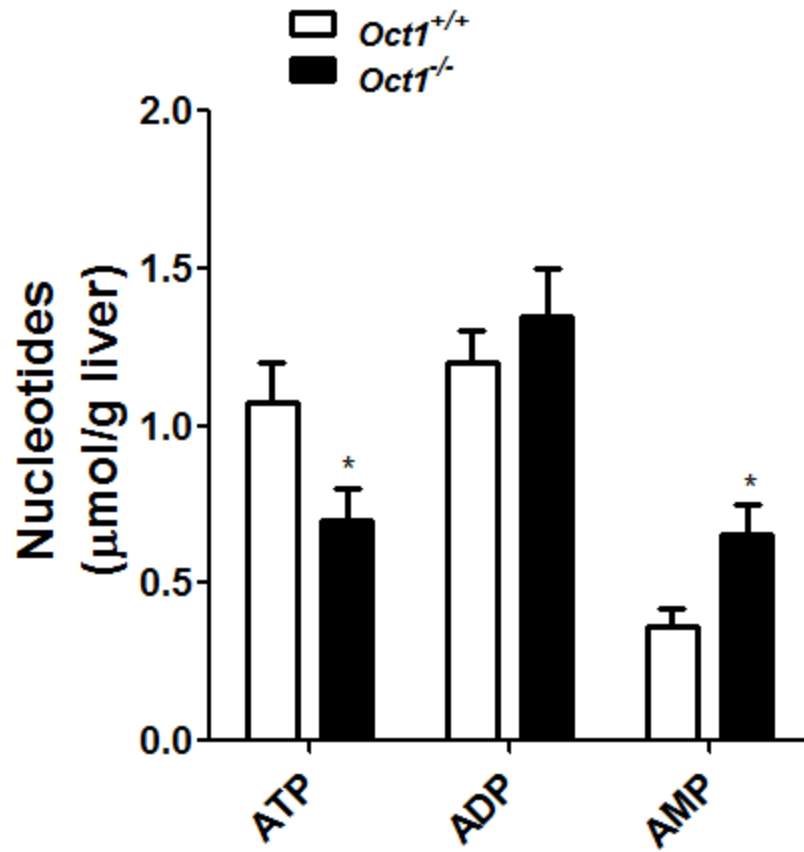

S6F

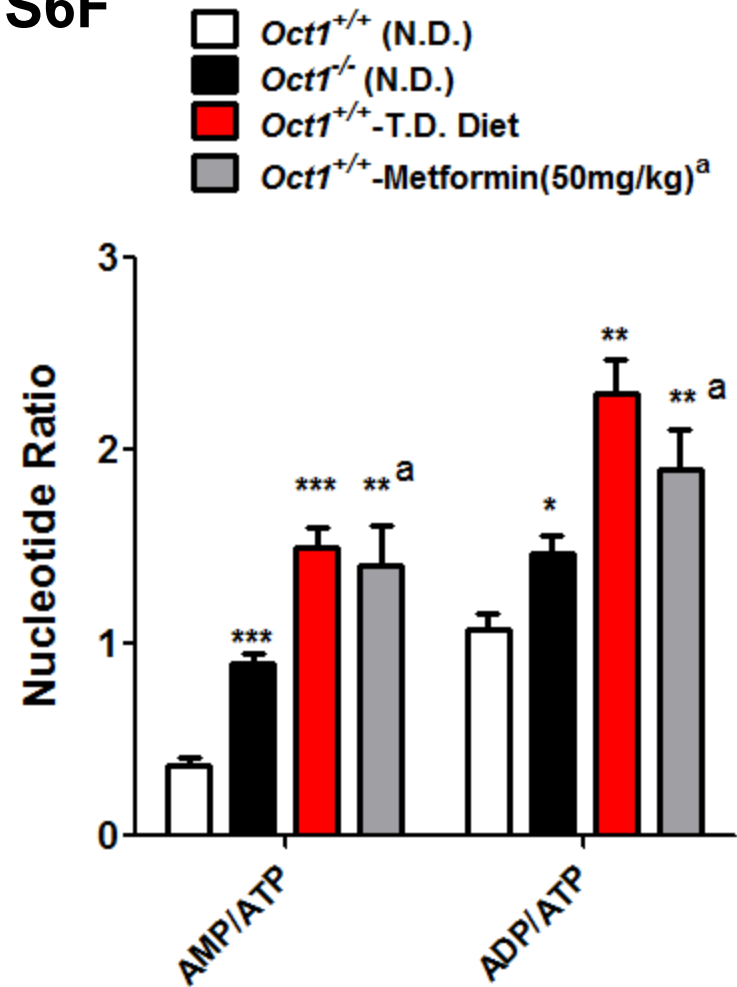

(E) Adenosine nucleotide levels in  $Oct1^{+/+}$  and  $Oct1^{-/-}$  mice livers (n=6/genotypes). \* $P < 0.05$ , \*\* $P < 0.01$ , compared with adenosine nucleotide levels in wildtype mouse livers. (F) AMP/ATP and ADP/ATP ratios in the livers from  $Oct1^{+/+}$  and  $Oct1^{-/-}$  mice fed normal diets (N.D.) or thiamine deficiency (TD) diets. The gray bar indicates ratios obtained in a previous study in livers from wildtype mice treated with metformin (Foretz et al).

S6G

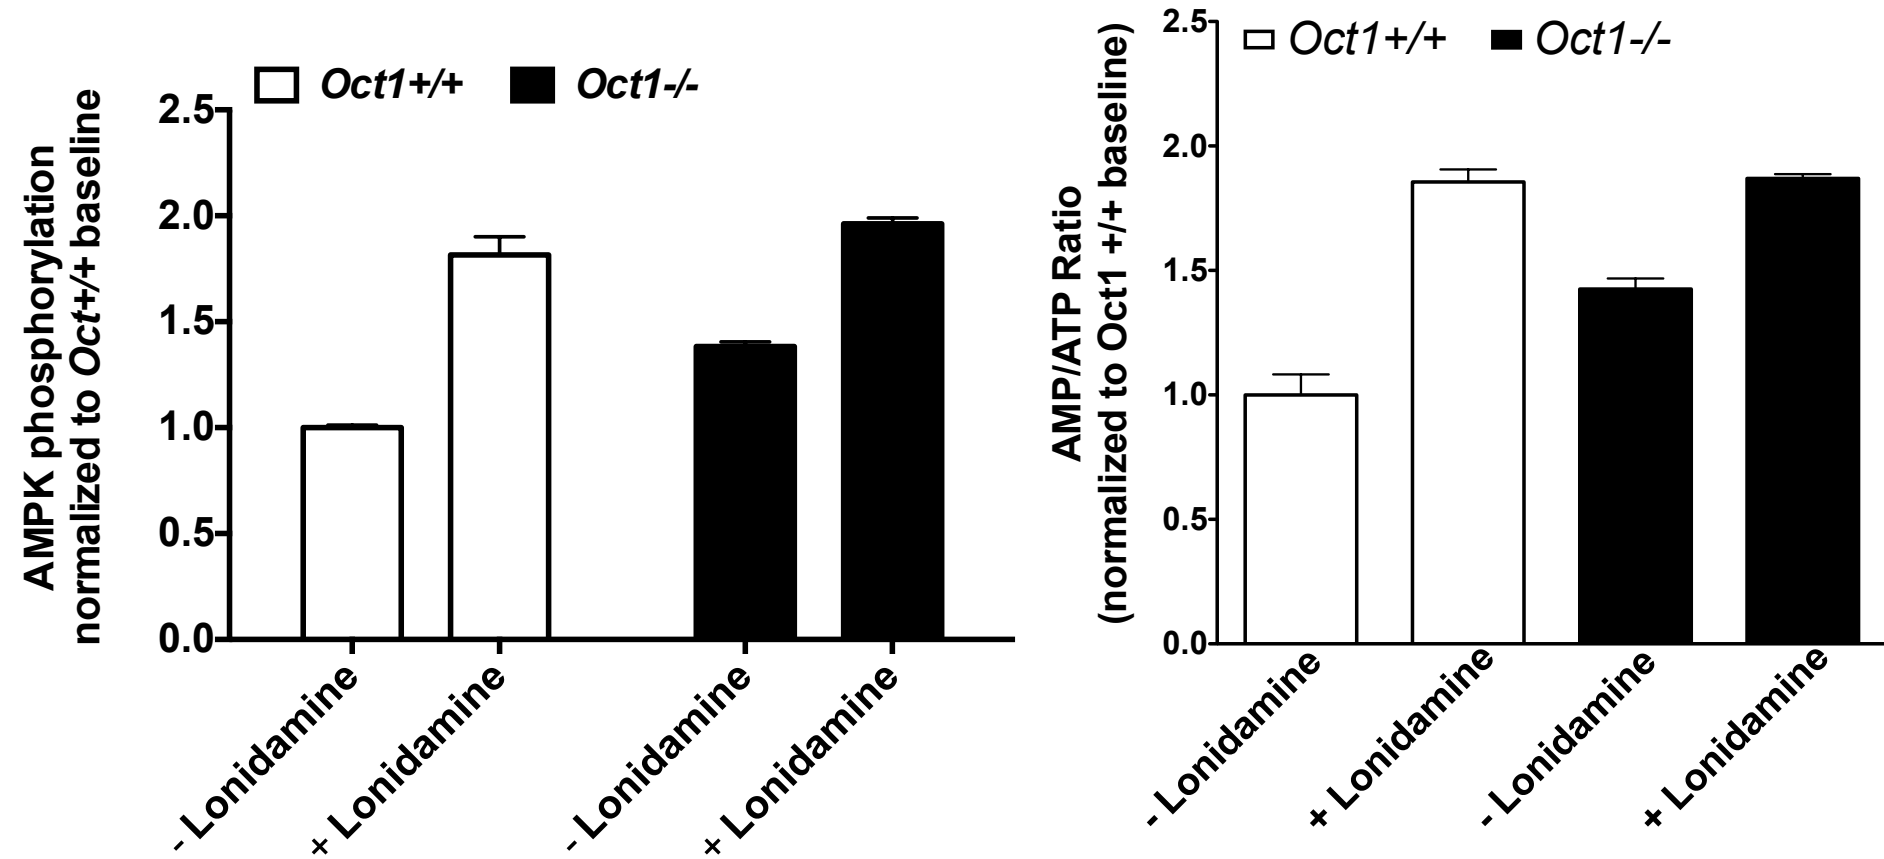

(G) The effect of lonidamine on AMPK phosphorylation (using ELISA, see SI Appendix) (Left) and AMP/ATP ratio (Right) in *Oct1*<sup>+/+</sup> and *Oct1*<sup>-/-</sup> primary hepatocytes.

## S6H

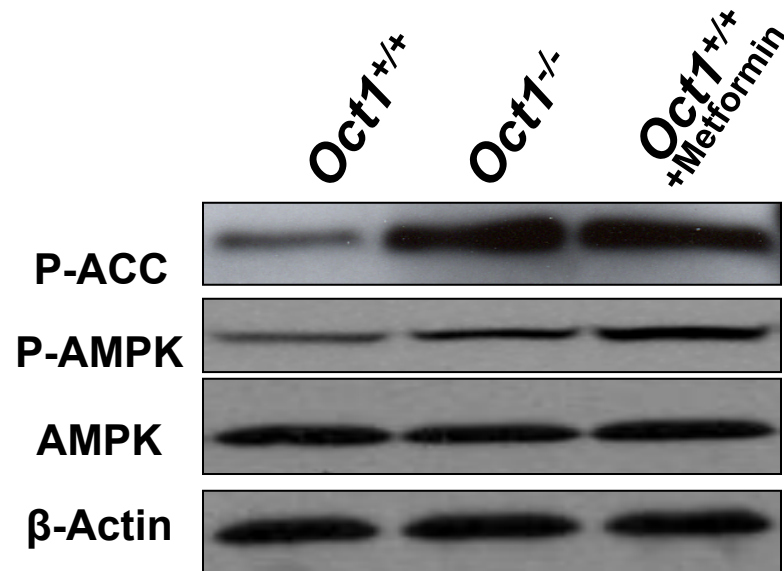

(H) Western blot of primary hepatocytes from *Oct1*<sup>+/+</sup>, *Oct1*<sup>-/-</sup> and *Oct1*<sup>+/+</sup> mice treated with metformin (2 mM). *Oct1*<sup>-/-</sup> mouse hepatocytes showed similar levels of P-ACC and P-AMPK to hepatocytes from *Oct1*<sup>+/+</sup> treated with metformin.

# Figure S7

## S7B

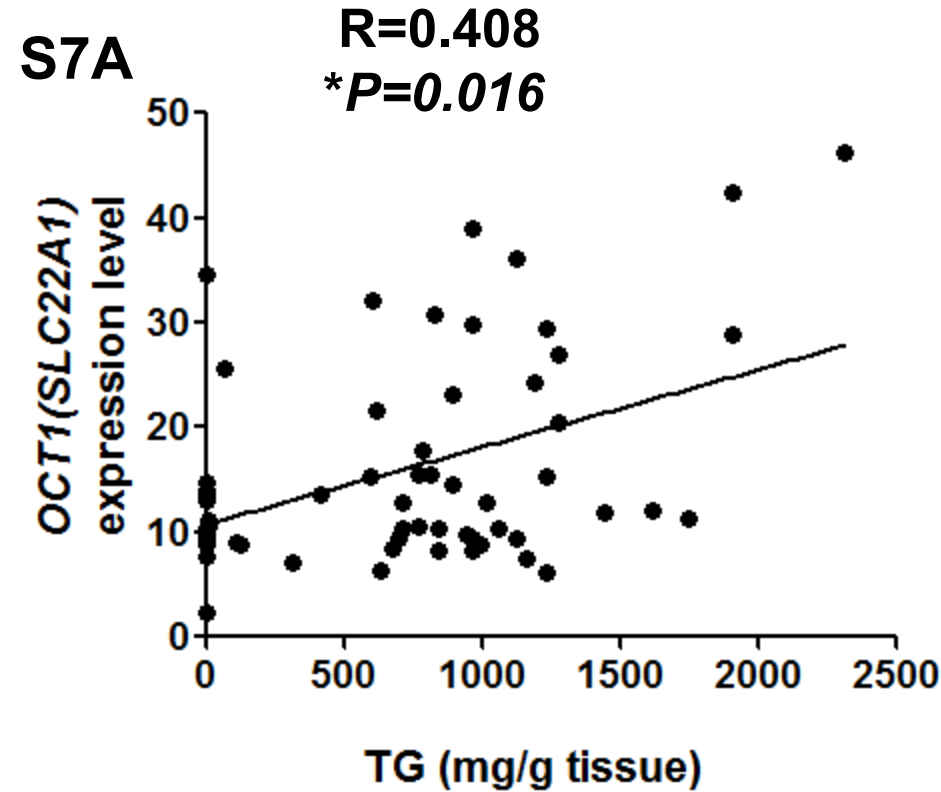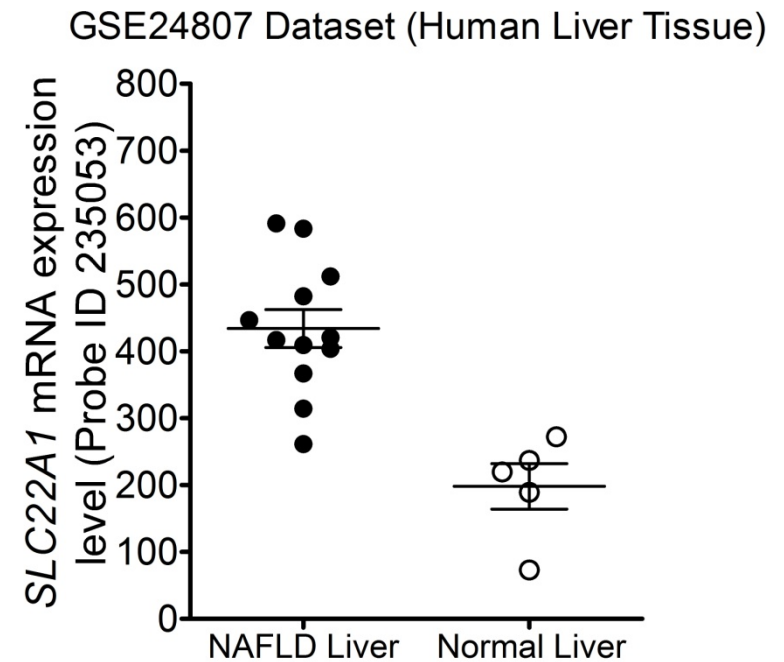

**Figure S7. hOCT1 expression level and TG levels in human liver samples.** (A) A significantly positive correlation is observed between TG levels and expression levels of OCT1 in liver samples from 60 Caucasians. The correlation between TG and OCT1 expression listed as  $R=0.408$  with a significant  $P$  value. mRNA expression level was normalized to  $\beta$ -actin. (B) OCT1 (SLC22A1) expression level in human NAFLD and normal liver samples (Liu WS et al., PLoS One 2011).

## Supporting Information (Supplementary Tables)

**Table S1. Results of lipidomic studies of serum from wildtype and *Oct1*<sup>-/-</sup> mice.**

| Name                          | KO mean ± std dev | WT mean ± std dev | mean-WT/<br>mean-KO | factor_p.values | factor_adjusted.<br>pvalues |
|-------------------------------|-------------------|-------------------|---------------------|-----------------|-----------------------------|
| 5TG 54:8 M+NH4@9.3            | 13400 ± 2600      | 26600 ± 7000      | 1.98                | 0.006504911     | 0.023394169                 |
| 8TG 54:6 M+NH4@10.2           | 2670000 ± 390000  | 1860000 ± 4e+05   | 0.696629213         | 0.005533398     | 0.020582172                 |
| 12TG 52:4 M+NH4@10.6          | 23500 ± 3300      | 17100 ± 2200      | 0.73                | 0.016184251     | 0.045724926                 |
| 53TG (52:2) [M+NH4]+@11       | 6340000 ± 110000  | 4680000 ± 420000  | 0.74                | 0.000536819     | 0.003842923                 |
| 63TG (50:1) [M+NH4]+@11       | 1390000 ± 99000   | 1170000 ± 140000  | 0.841726619         | 0.012267489     | 0.037487825                 |
| 70SM 39:1 M+Na@6.5            | 22500 ± 2000      | 34800 ± 1600      | 1.54                | 0.000125523     | 0.001513883                 |
| 71SM 38:1 M+Na@6.2            | 65300 ± 2600      | 88400 ± 4800      | 1.35                | 0.000113217     | 0.001422296                 |
| 72SM 36:1 [M+Na]+@5.5         | 34700 ± 3300      | 45300 ± 1600      | 1.3                 | 0.00174754      | 0.008878992                 |
| 77SM (d18:2/24:0) A M+H@6.6   | 21400 ± 1200      | 29800 ± 1400      | 1.39                | 0.000111797     | 0.001420062                 |
| 79SM (d18:2/23:0) B M+H@6.5   | 342000 ± 18000    | 436000 ± 21000    | 1.28                | 0.000443445     | 0.003296459                 |
| 80SM (d18:1/24:0) [M+H]+@7.6  | 980000 ± 32000    | 1260000 ± 61000   | 1.29                | 0.000134588     | 0.001591065                 |
| 81SM (d18:1/23:0) A M+H@7.2   | 369000 ± 14000    | 458000 ± 23000    | 1.24                | 0.000537494     | 0.003842923                 |
| 82SM (d18:1/22:0) [M+H]+@6.9  | 1560000 ± 58000   | 2050000 ± 95000   | 1.31                | 0.000103423     | 0.00140019                  |
| 83SM (d18:1/21:0) M+H@6.6     | 149000 ± 7700     | 223000 ± 9400     | 1.5                 | 1.90433E-05     | 0.000561653                 |
| 84SM (d18:1/20:0) M+H@6.2     | 325000 ± 15000    | 461000 ± 25000    | 1.42                | 7.09912E-05     | 0.001145453                 |
| 87SM (d16:1/20:1) [M+H]+@5    | 292000 ± 15000    | 395000 ± 17000    | 1.35                | 0.000107148     | 0.00140019                  |
| 88SM (d16:1/20:0) M+H@5.5     | 348000 ± 17000    | 470000 ± 23000    | 1.35                | 0.0001231       | 0.00149981                  |
| 90Plasmenyl-PE 40:5 M+H@6.1   | 149000 ± 9100     | 179000 ± 10000    | 1.2                 | 0.00451483      | 0.01761669                  |
| 92Plasmenyl-PE 38:4 M+H@6.2   | 137000 ± 7700     | 157000 ± 9300     | 1.15                | 0.015555294     | 0.044165077                 |
| 93Plasmenyl-PE 38:4 M+H@6     | 43700 ± 2300      | 24600 ± 1400      | 0.56                | 6.32E-06        | 0.000342987                 |
| 94Plasmenyl-PE 38:4 M+H@5.9   | 16800 ± 730       | 14200 ± 460       | 0.84                | 0.000749936     | 0.004840125                 |
| 95Plasmenyl-PE 36:4@5.5       | 161000 ± 5800     | 141000 ± 7700     | 0.88                | 0.007729525     | 0.02655153                  |
| 98Plasmenyl-PC 38:4 [M+H]+@6  | 83800 ± 3700      | 96400 ± 4200      | 1.15                | 0.004322689     | 0.017204302                 |
| 99Plasmenyl-PC (34:1) M+H@5.5 | 226000 ± 9100     | 277000 ± 15000    | 1.22                | 0.001083733     | 0.006208874                 |
| 102PE 40:6 M+H@5.5            | 63900 ± 2200      | 58700 ± 2000      | 0.92                | 0.013190139     | 0.039114312                 |
| 105PE 37:3 M+H@4.8            | 2e+06 ± 80000     | 2740000 ± 130000  | 1.37                | 6.60617E-05     | 0.001080516                 |
| 106PE 37:3 M+H@4.6            | 3350000 ± 150000  | 5270000 ± 250000  | 1.57                | 8.93E-06        | 0.000375054                 |
| 107PE 36:2 M+H@4.8            | 315000 ± 15000    | 395000 ± 19000    | 1.25                | 0.000576576     | 0.004025919                 |
| 108PE 36:1 M+H@6.5            | 17200 ± 850       | 14900 ± 1000      | 0.86                | 0.013425963     | 0.039558413                 |
| 109PE 36:1 M+H@5.3            | 169000 ± 7600     | 206000 ± 9500     | 1.22                | 0.000954457     | 0.005634925                 |
| 114PC 42:6 M+H@6              | 51500 ± 2200      | 39100 ± 1900      | 0.76                | 0.000159084     | 0.001715953                 |
| 118PC 40:6 M+Na@5.4           | 111000 ± 7600     | 77800 ± 3900      | 0.7                 | 0.000154406     | 0.001715953                 |
| 123PC 38:8@4.5                | 283000 ± 20000    | 388000 ± 25000    | 1.37                | 0.000589743     | 0.00407025                  |
| 124PC 38:5 M+H@5.3            | 4290000 ± 250000  | 3700000 ± 180000  | 0.86                | 0.008016742     | 0.027193155                 |
| 134PC 38:2 M+H@6.4            | 429000 ± 16000    | 386000 ± 16000    | 0.9                 | 0.009473258     | 0.031074368                 |
| 136PC 37:3 M+H@5.5            | 84300 ± 3000      | 74100 ± 3900      | 0.88                | 0.006918042     | 0.024698779                 |
| 138PC 36:5 M+H@5.4            | 51700 ± 3400      | 75200 ± 11000     | 1.45                | 0.002623443     | 0.011820345                 |
| 145PC 36:3 A M+H@5.2          | 5400000 ± 330000  | 6290000 ± 3e+05   | 1.16                | 0.007706095     | 0.02655153                  |
| 149PC 36:1 M+H@6.3            | 3850000 ± 190000  | 4440000 ± 210000  | 1.15                | 0.005745468     | 0.021173113                 |
| 152PC 34:0 M+H@6.2            | 1310000 ± 46000   | 1560000 ± 80000   | 1.19                | 0.00161588      | 0.008444839                 |
| 153PC 32:2@4.6                | 21400 ± 2000      | 37700 ± 6500      | 1.76                | 0.001520374     | 0.008104135                 |
| 154PC 32:2@4.5                | 360000 ± 10000    | 712000 ± 39000    | 1.98                | 6.18E-07        | 0.000166027                 |
| 156PC 32:1 M+H@5              | 1710000 ± 77000   | 2520000 ± 120000  | 1.48                | 2.16467E-05     | 0.000587412                 |
| 166PC (36:6)@4.3              | 60000 ± 3900      | 110000 ± 3500     | 1.84                | 2.80E-06        | 0.00029434                  |
| 167PC (34:2) [M+H]+@5.5       | 199000 ± 17000    | 259000 ± 20000    | 1.3                 | 0.003594909     | 0.015008117                 |
| 170LPC (20:2)@1.9             | 37700 ± 3700      | 31600 ± 1400      | 0.84                | 0.017662078     | 0.049043073                 |
| 174LPC (18:2)@1.3             | 4120000 ± 190000  | 4880000 ± 280000  | 1.18                | 0.003947821     | 0.016142802                 |
| 175LPC (18:2)@1.2             | 2280000 ± 240000  | 3210000 ± 190000  | 1.41                | 0.001344925     | 0.007299273                 |
| 177LPC (18:1)@1.7             | 3440000 ± 180000  | 3910000 ± 2e+05   | 1.14                | 0.013591782     | 0.039775951                 |
| 178LPC (18:1)@1.6             | 788000 ± 95000    | 1070000 ± 64000   | 1.36                | 0.003644372     | 0.015161604                 |
| 183DG 36:3 M+Na@6.6           | 265000 ± 7800     | 227000 ± 9500     | 0.86                | 0.000899616     | 0.00542496                  |
| 184DG 36:2 [M+Na]+@7.1        | 123000 ± 2800     | 90700 ± 2600      | 0.74                | 3.11E-06        | 0.00029434                  |
| 187Ceramide d40:1 [M+Na]+@7.8 | 38600 ± 1100      | 44800 ± 2900      | 1.16                | 0.005993105     | 0.021883079                 |

|                      |              |              |      |             |             |
|----------------------|--------------|--------------|------|-------------|-------------|
| 188CE 22:6 M+Na@10.1 | 42400 ± 4600 | 58200 ± 2200 | 1.37 | 0.001355288 | 0.007322235 |
| 189CE 18:2 M+Na@10.6 | 44700 ± 960  | 76800 ± 5900 | 1.72 | 8.20E-06    | 0.000375054 |

**Lipidomics of serums from *Oct1*<sup>+/+</sup> and *Oct1*<sup>-/-</sup> mice.** All data are expressed as Mean ± SEM, \**P*<0.05, compared with OCT1. Mice were fed with normal diet for 20 weeks (n=3/genotypes). The data were listed which had a \**P* <0.05, compared with wildtype mice.

**Table S2. *Oct1*<sup>+/+</sup> and *Oct1*<sup>-/-</sup> mouse liver tissue extraction metabolomics  
HILIC profiling report: Group 1: Wildtype mice, Group 2: *Oct1*<sup>-/-</sup> mice, Group 3: Blank**

|                           |            |
|---------------------------|------------|
| Period                    | 1          |
| Experiment                | 1          |
| Min. Retention Time       | 1.80 min   |
| Max. Retention Time       | 29.00 min  |
| Subtraction Offset        | 10 scans   |
| Subtraction Mult. Factor  | 1.3        |
| Noise Threshold           | 3          |
| Min. Spectral Peak Width  | 0.80 amu   |
| Min. RT Peak Width        | 5 scans    |
| Max. RT Peak Width        | 1000 scans |
| Retention Time Tolerance  | 0.50 min   |
| Mass Tolerance            | 0.80 amu   |
| Use Global Exclusion List | False      |
| Max. Number of Peaks      | 5000       |
| Use Raw Data Area         | Tue        |

**Samples:**

| Sample Name | Group | Use | Scale Factor | RT Correction |
|-------------|-------|-----|--------------|---------------|
| Blank       | 3     | Yes | 1.00         | None          |
| Blank       | 3     | Yes | 1.00         | None          |
| Blank       | 3     | Yes | 1.00         | None          |
| ko1         | 2     | Yes | 1.00         | None          |
| ko2         | 2     | Yes | 1.00         | None          |
| ko3         | 2     | Yes | 1.00         | None          |
| ko4         | 2     | Yes | 1.00         | None          |
| Ko5         | 2     | Yes | 1.00         | None          |
| Ko6         | 2     | Yes | 1.00         | None          |
| wt1         | 1     | Yes | 1.00         | None          |
| wt2         | 1     | Yes | 1.00         | None          |
| wt3         | 1     | Yes | 1.00         | None          |
| wt4         | 1     | Yes | 1.00         | None          |
| wt5         | 1     | Yes | 1.00         | None          |
| wt6         | 1     | Yes | 1.00         | None          |

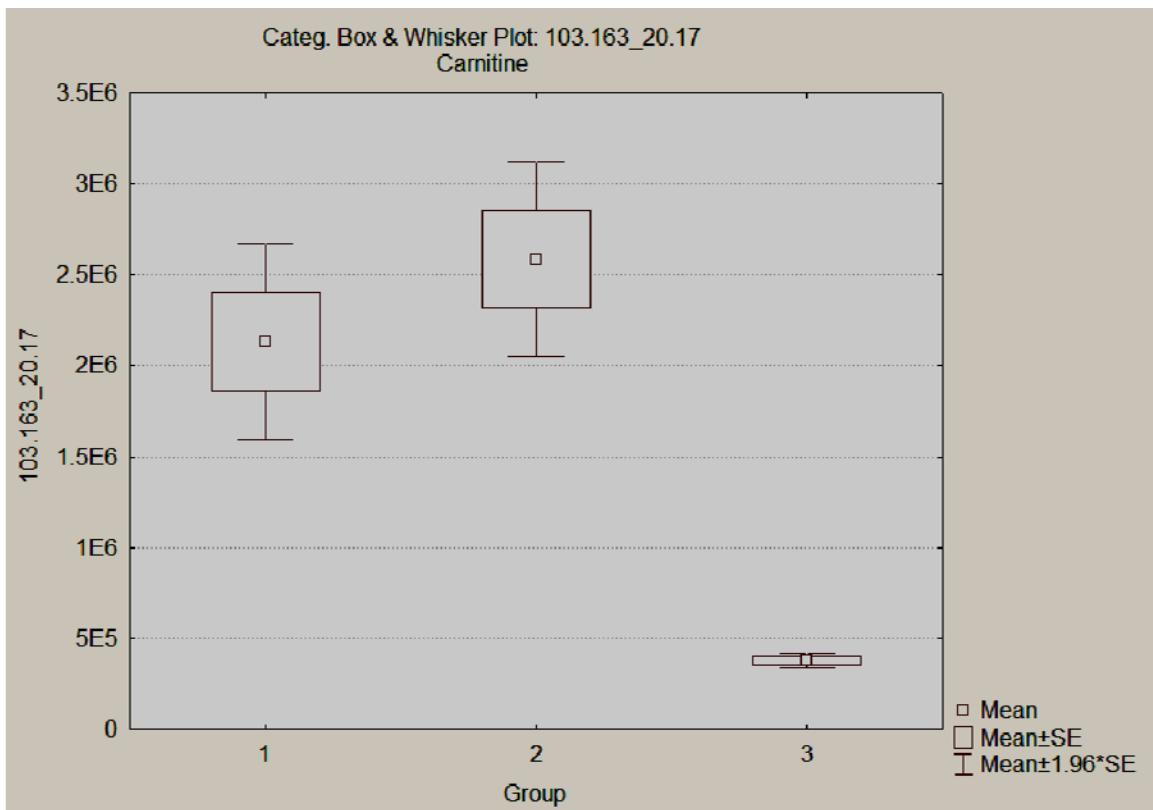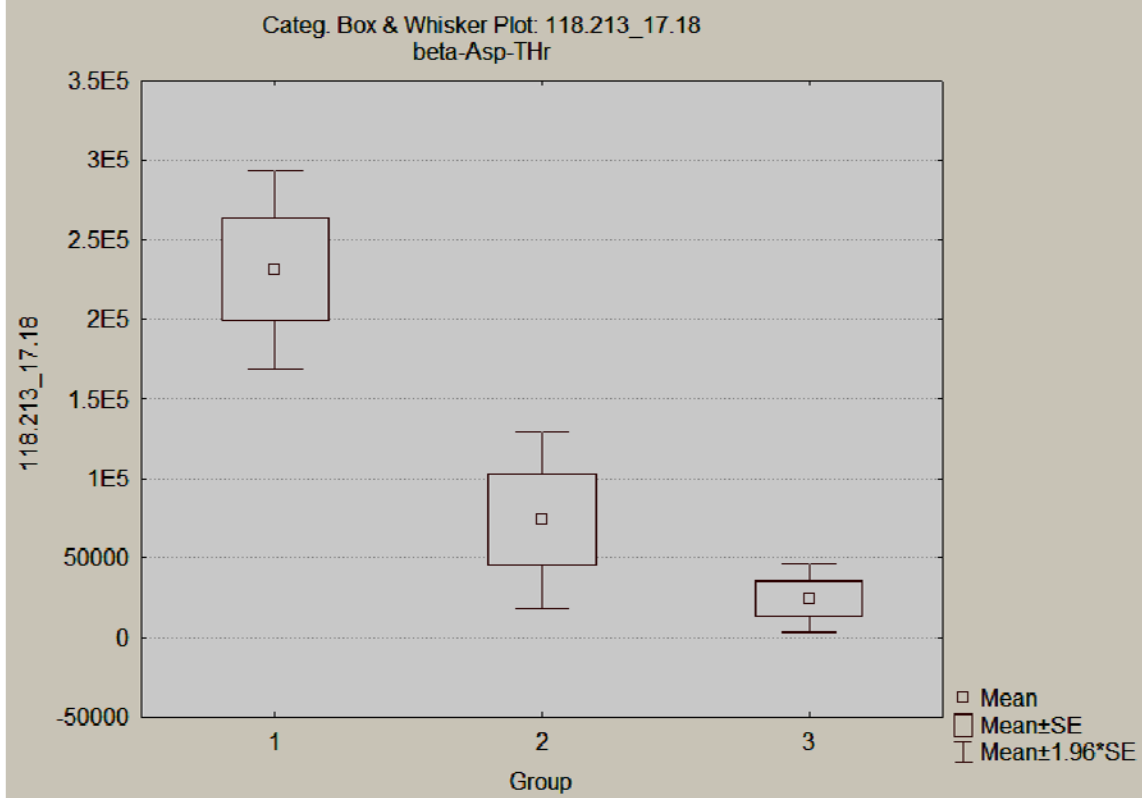

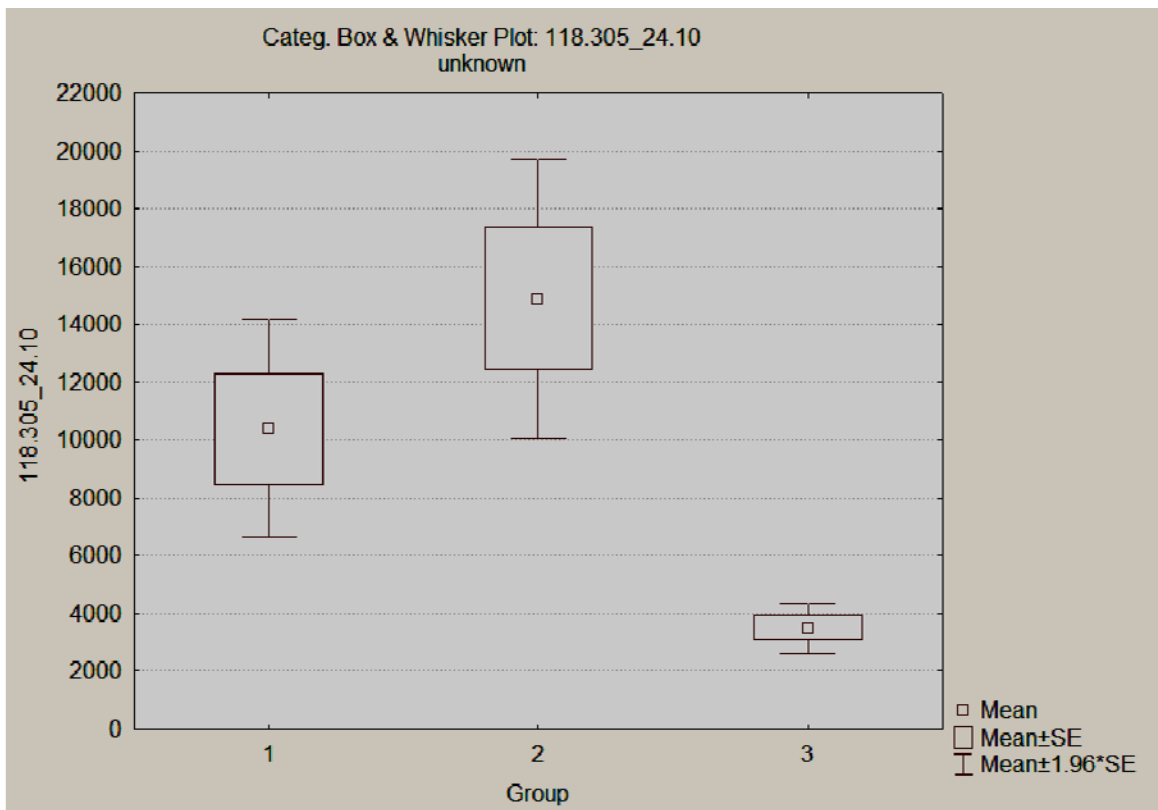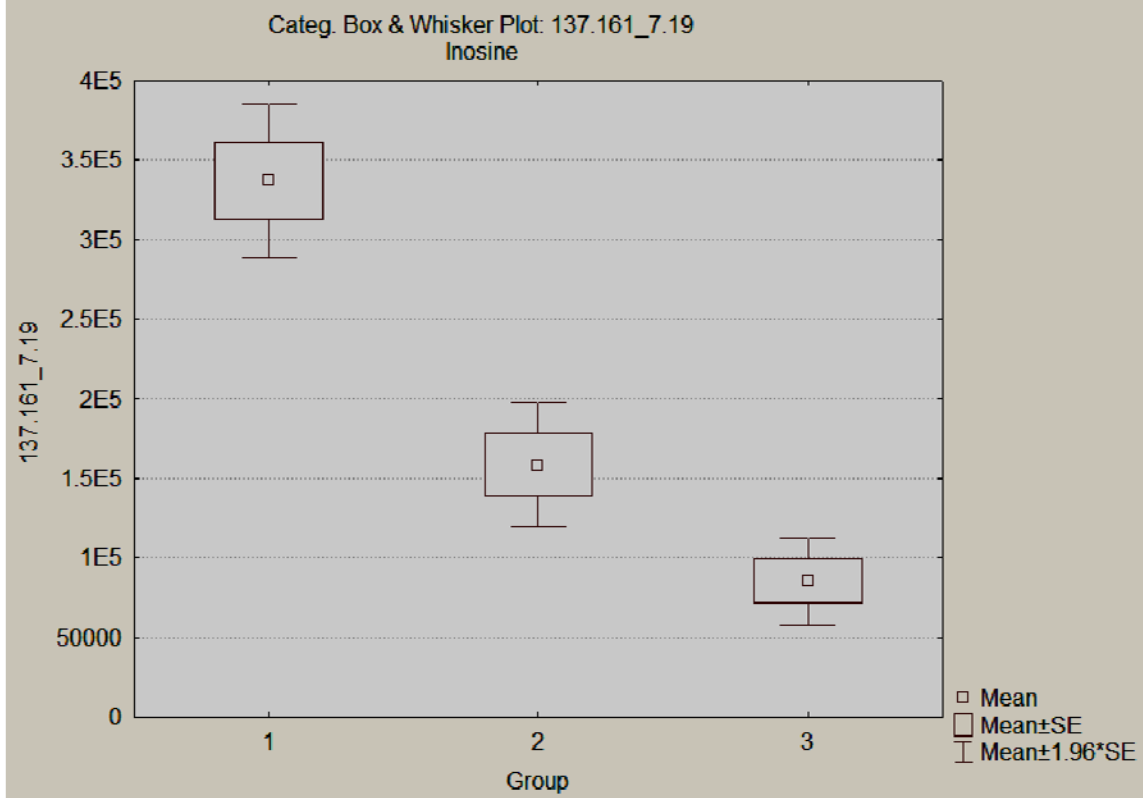

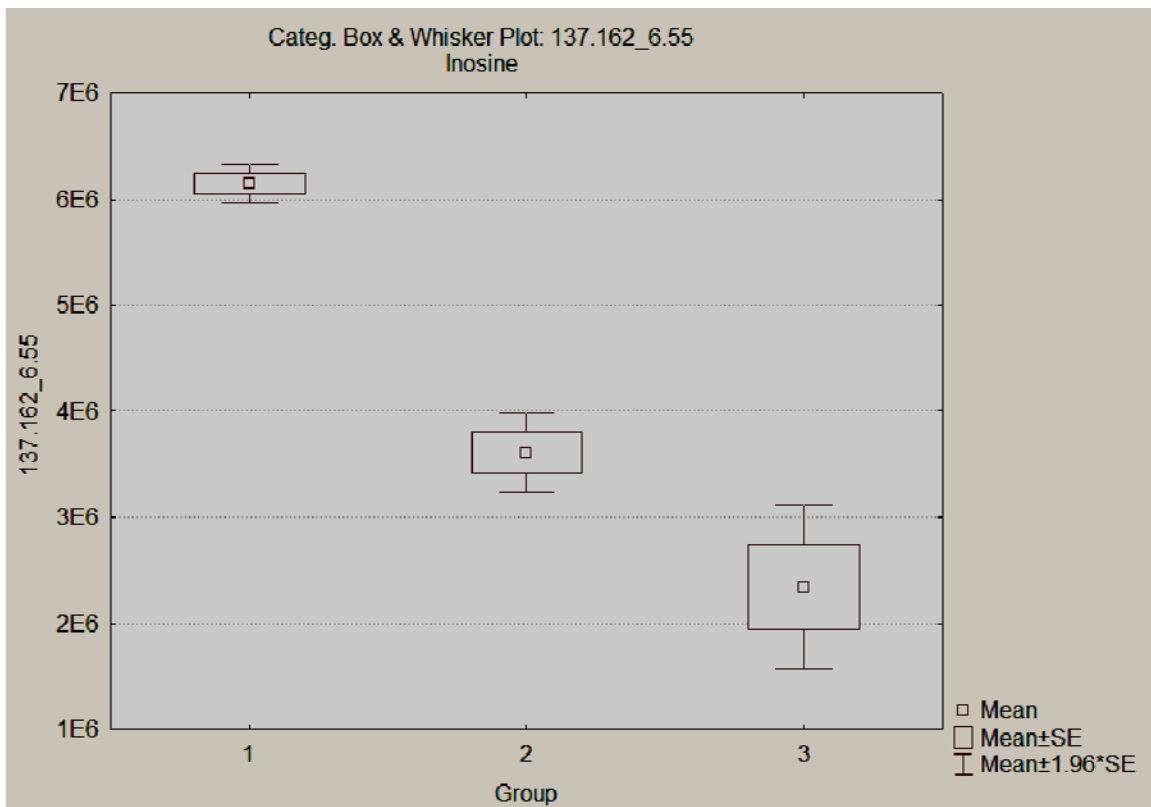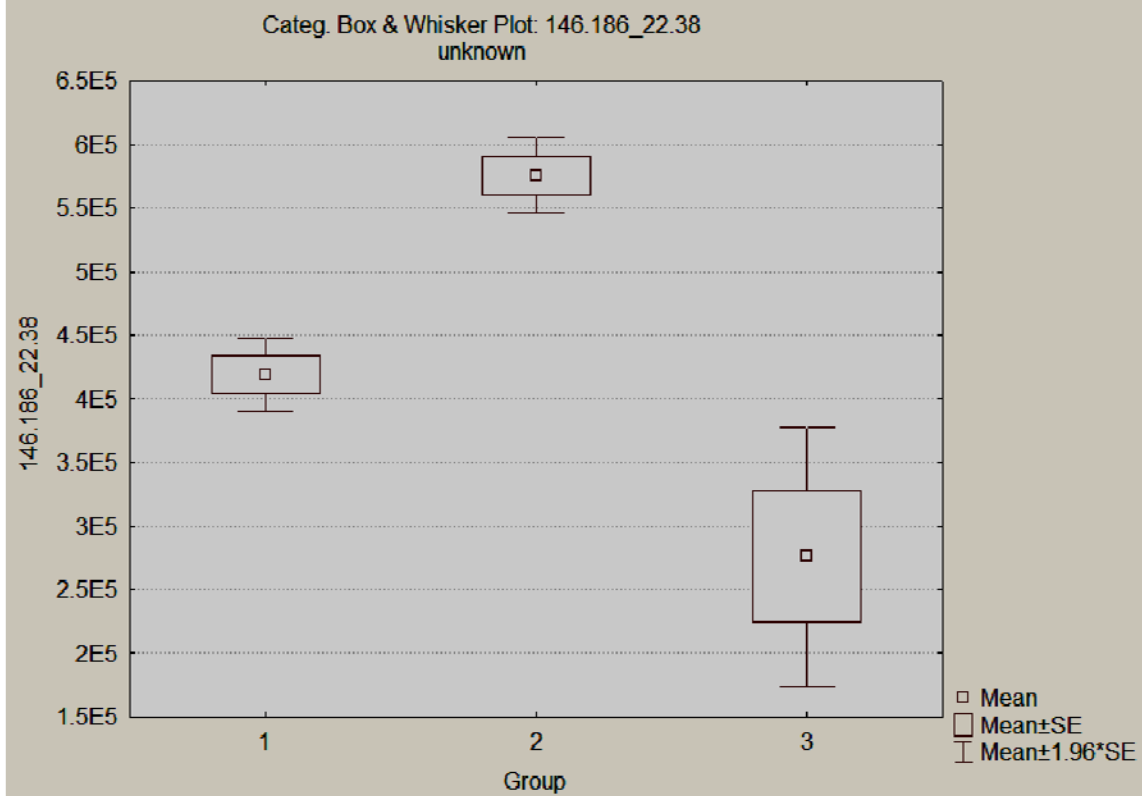

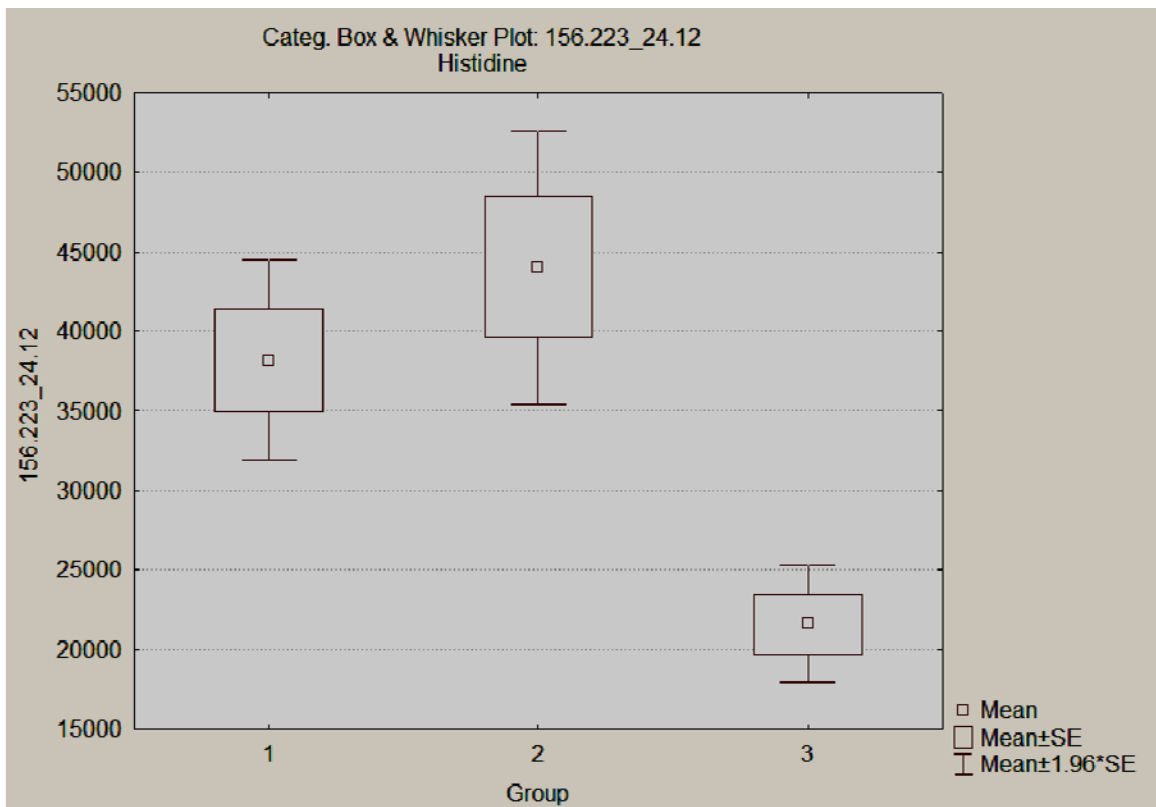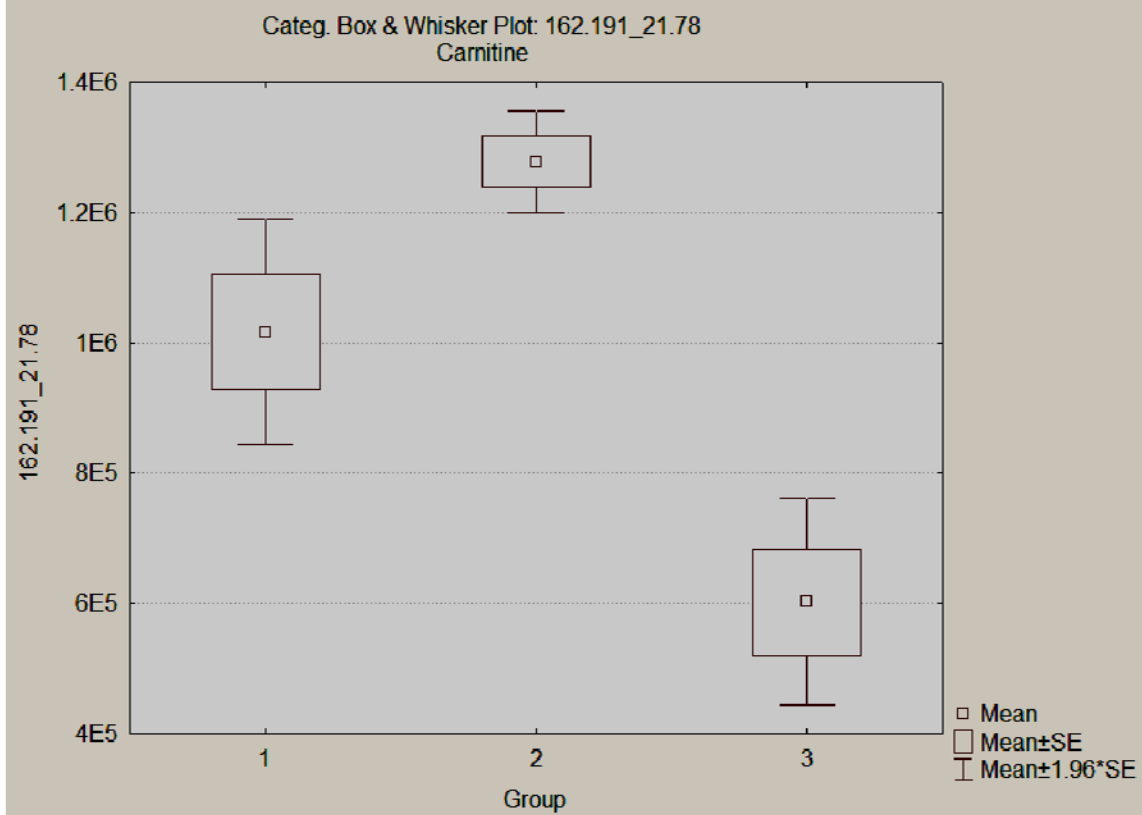

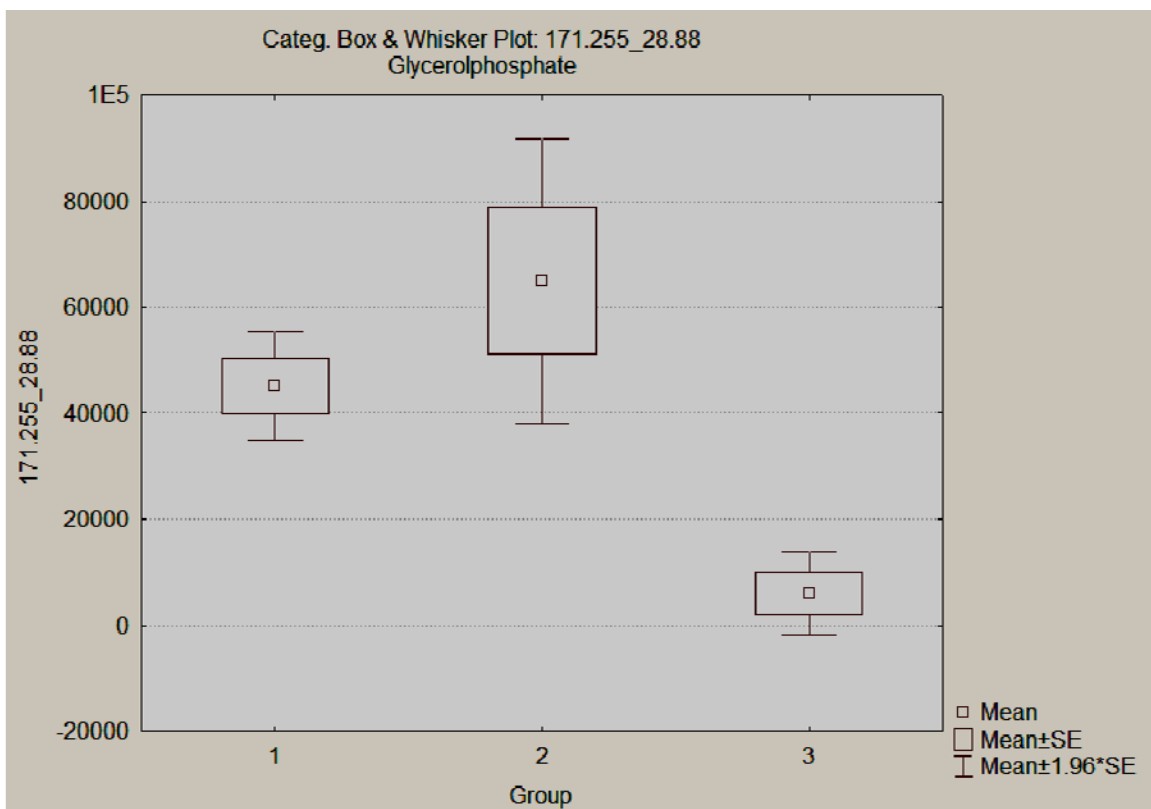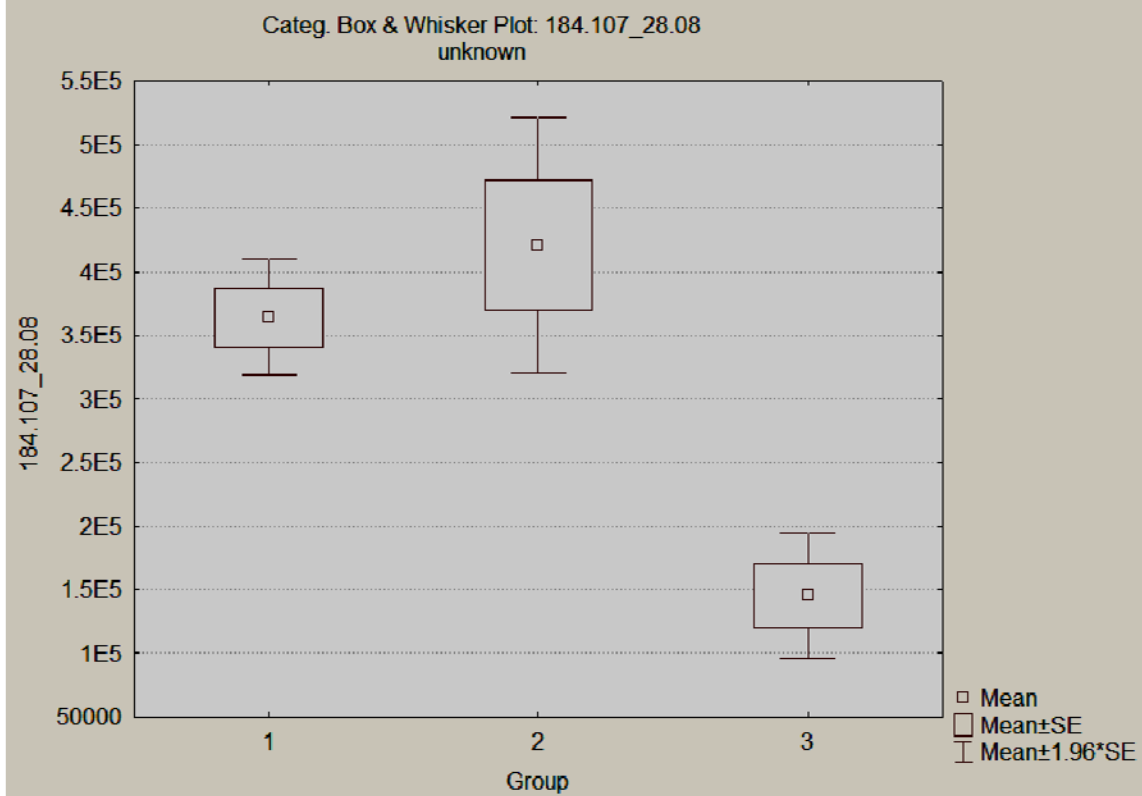

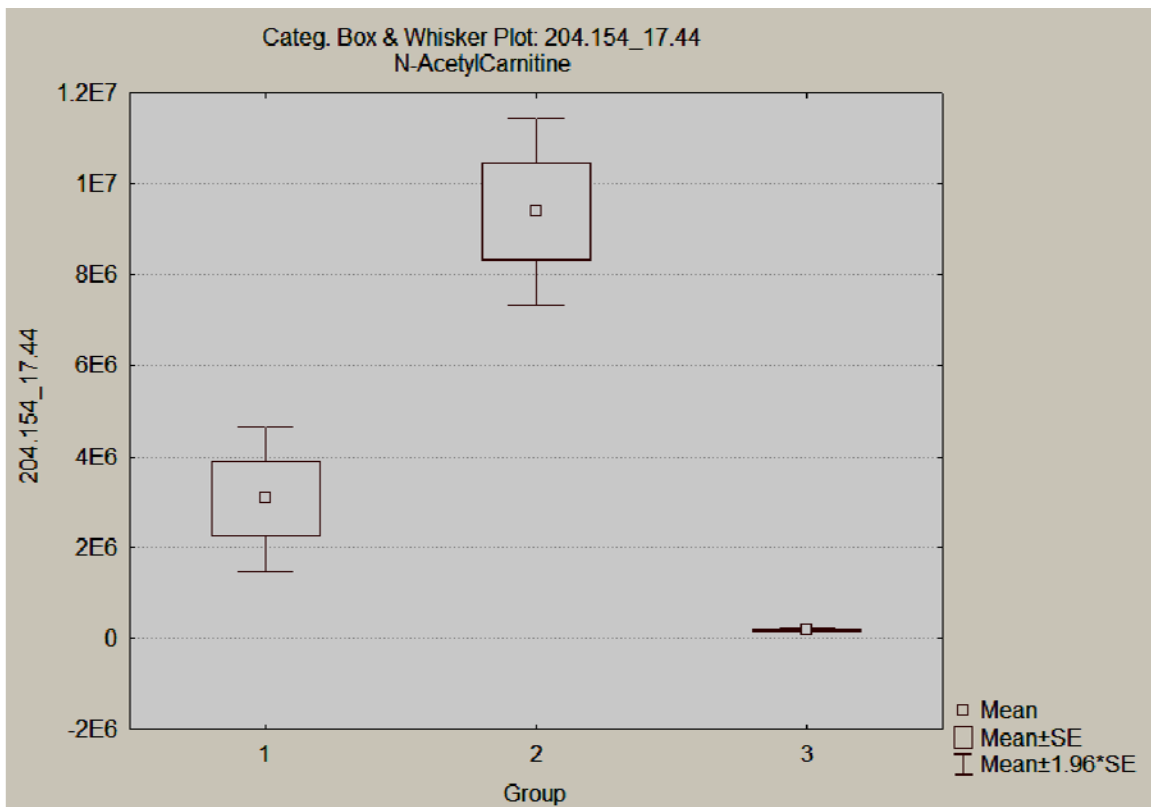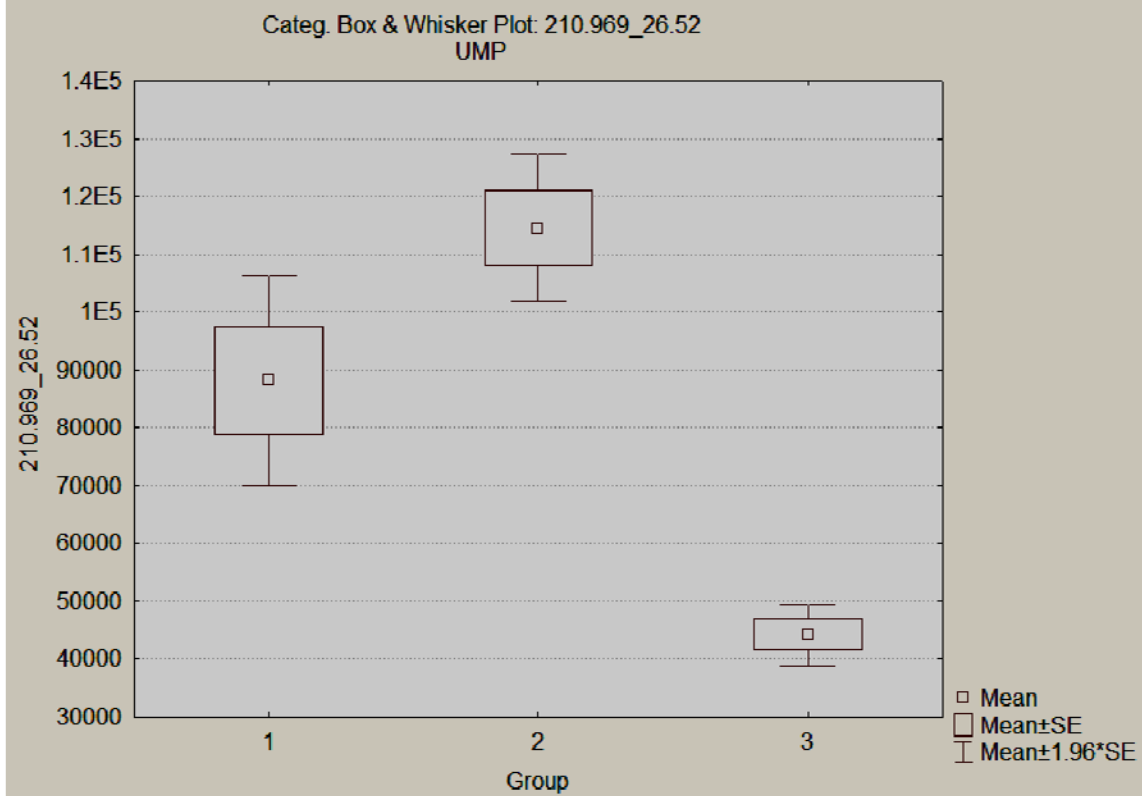

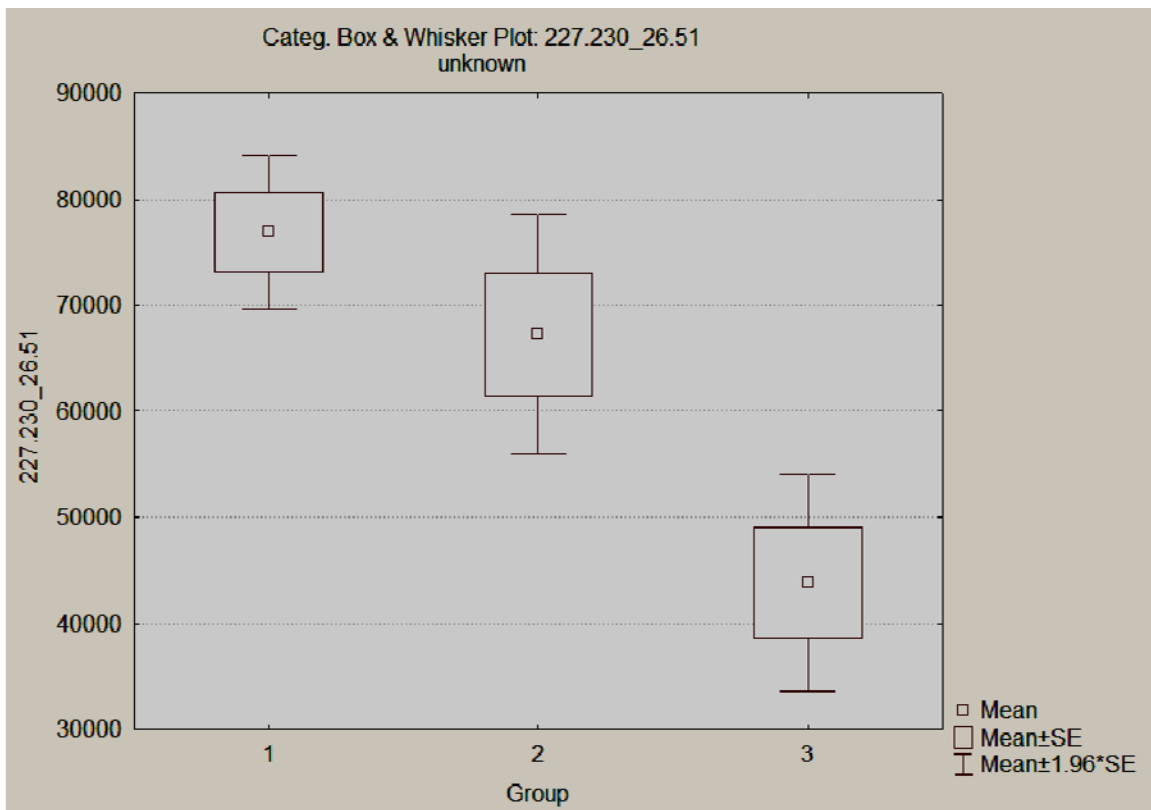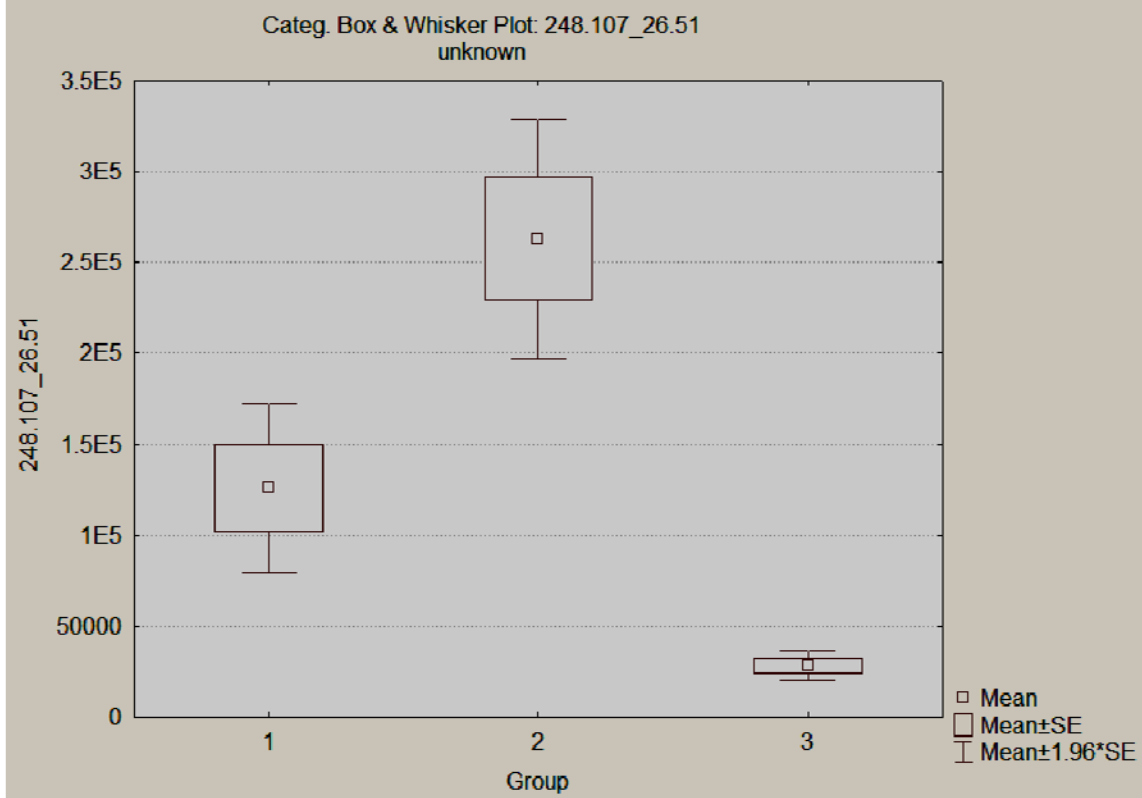

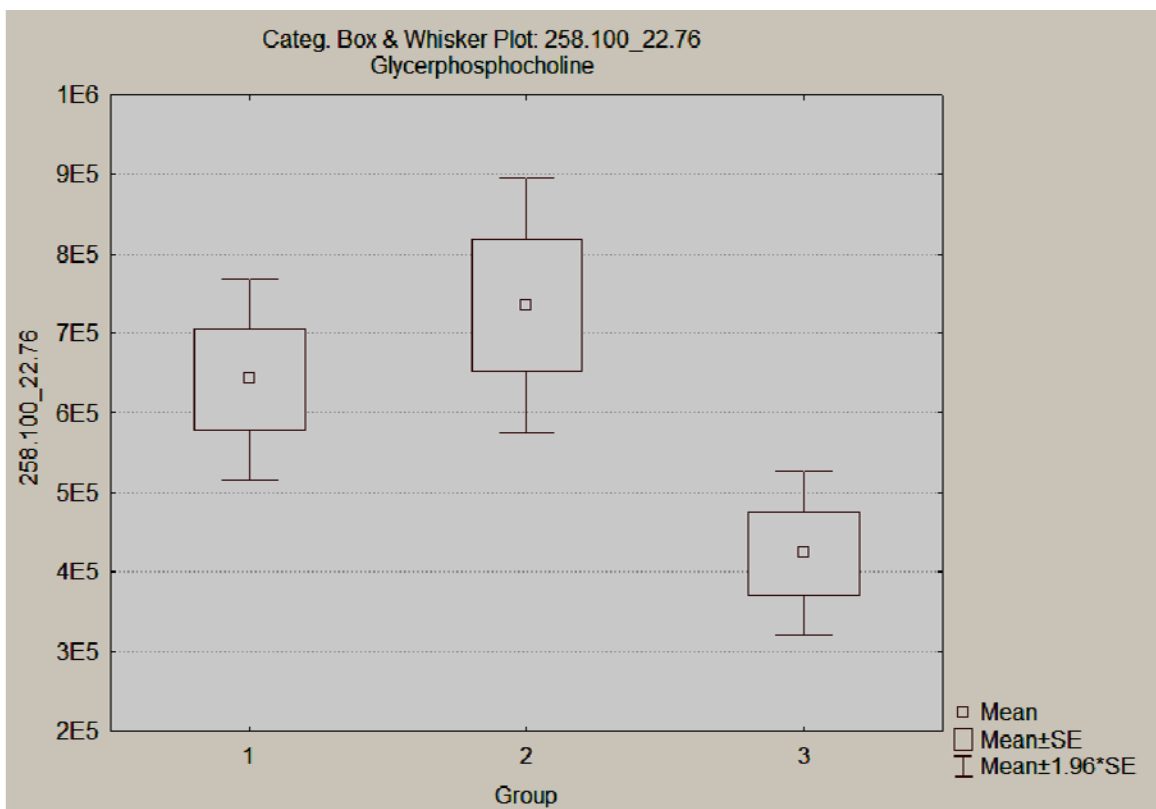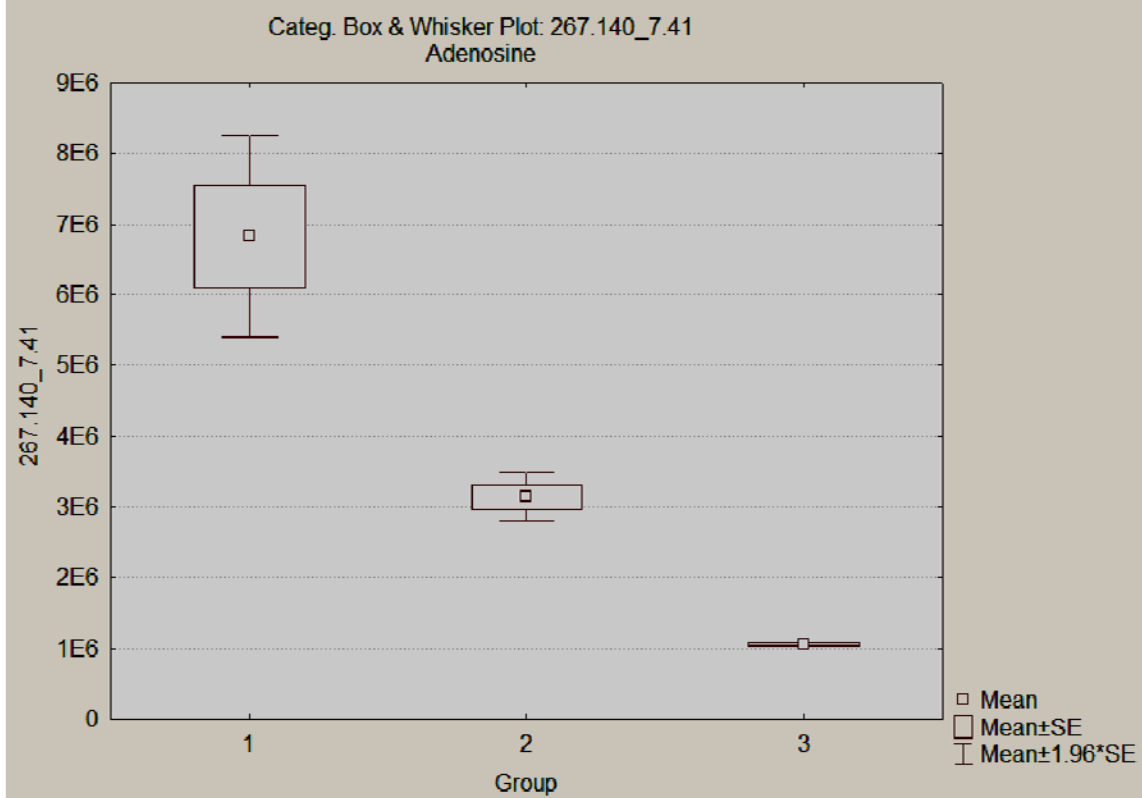

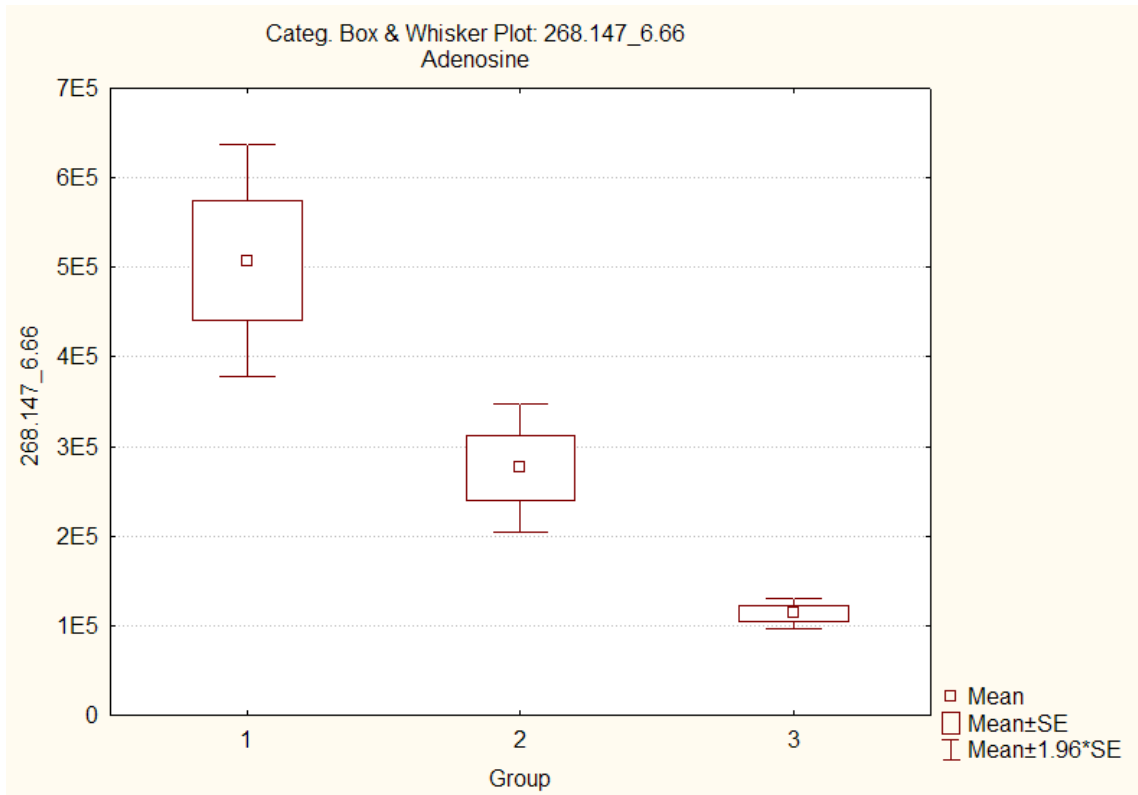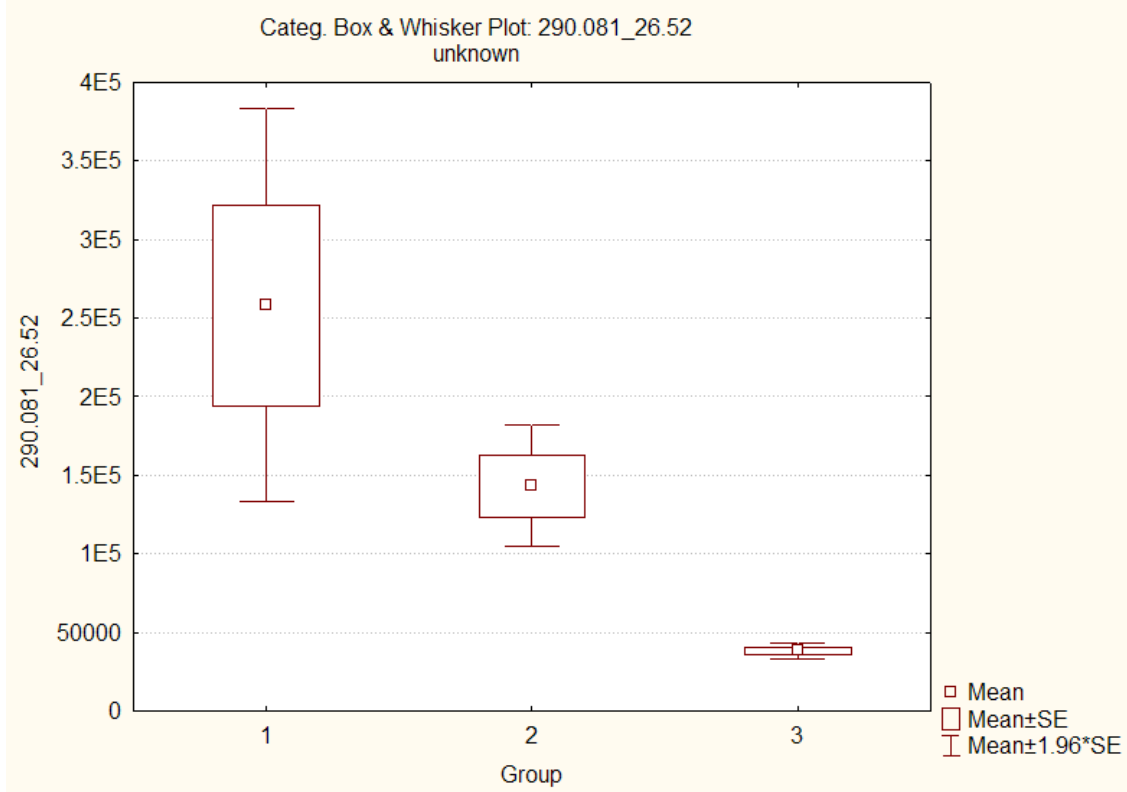

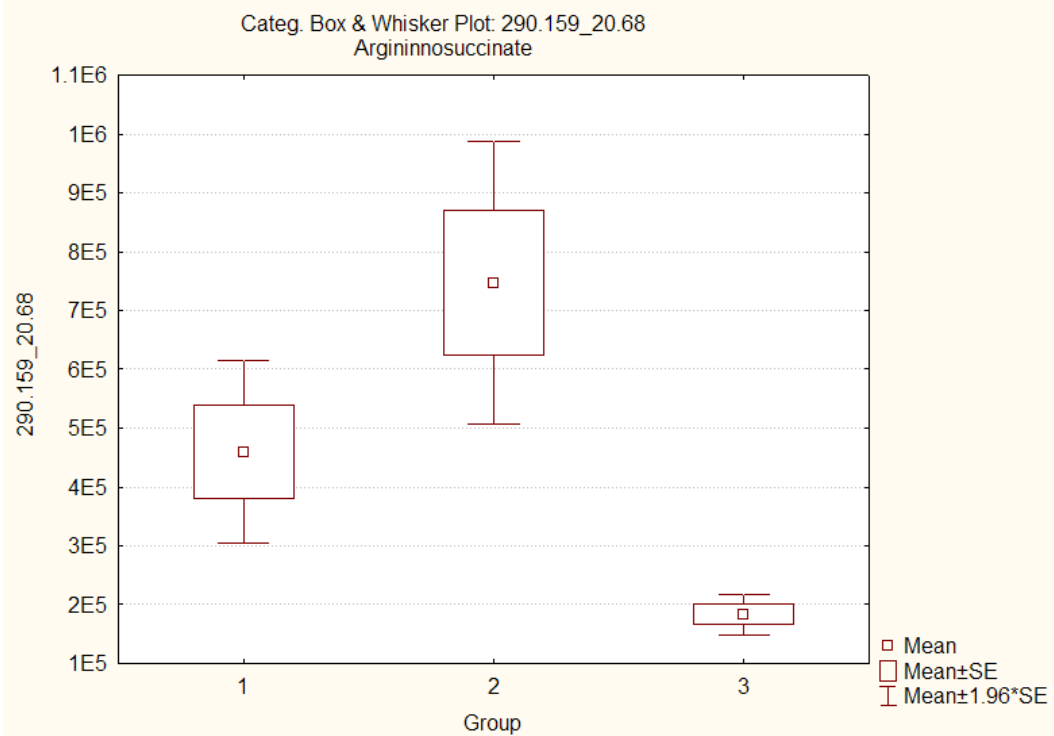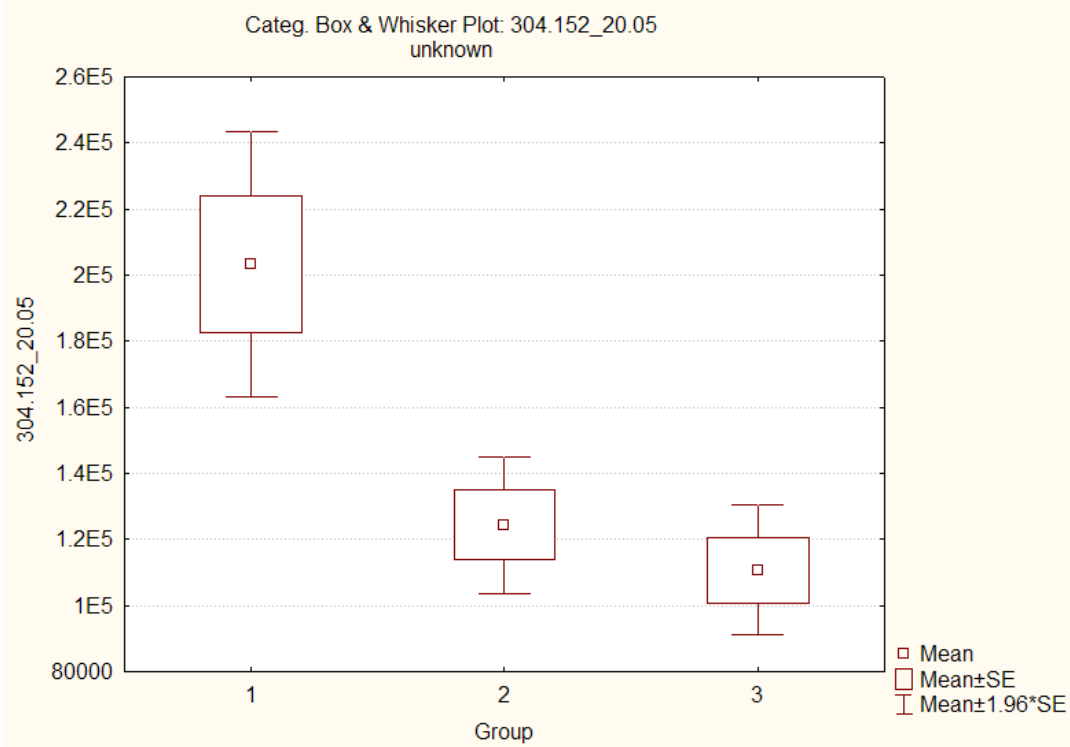

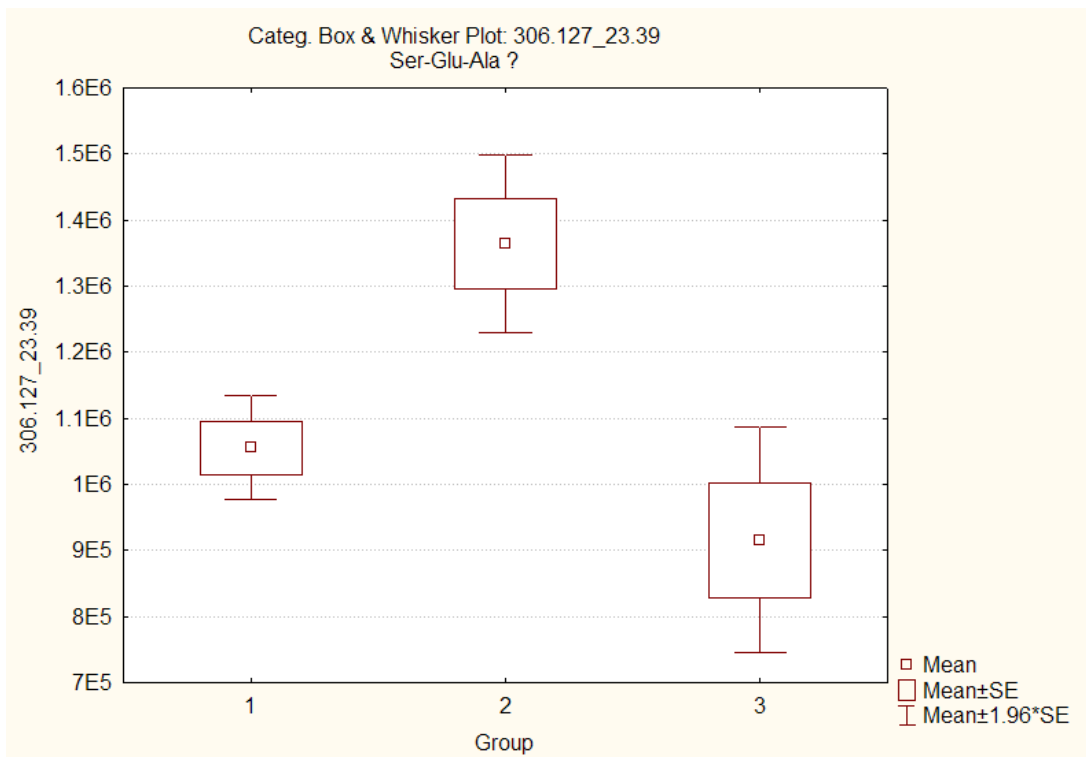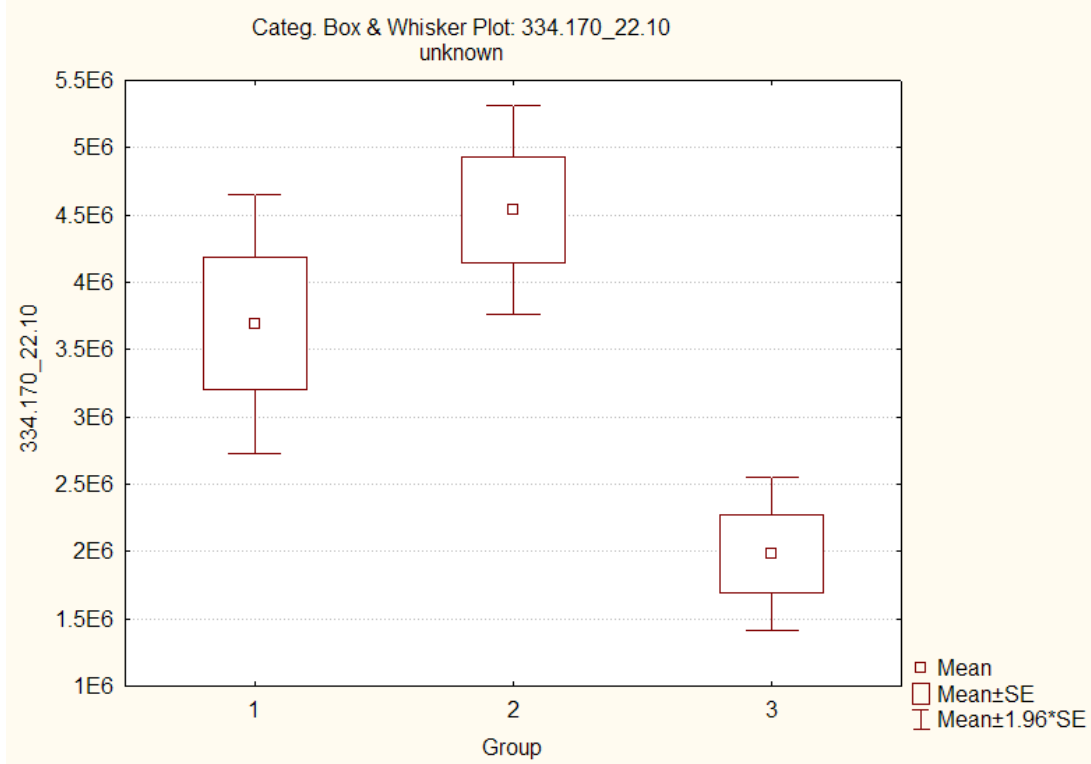

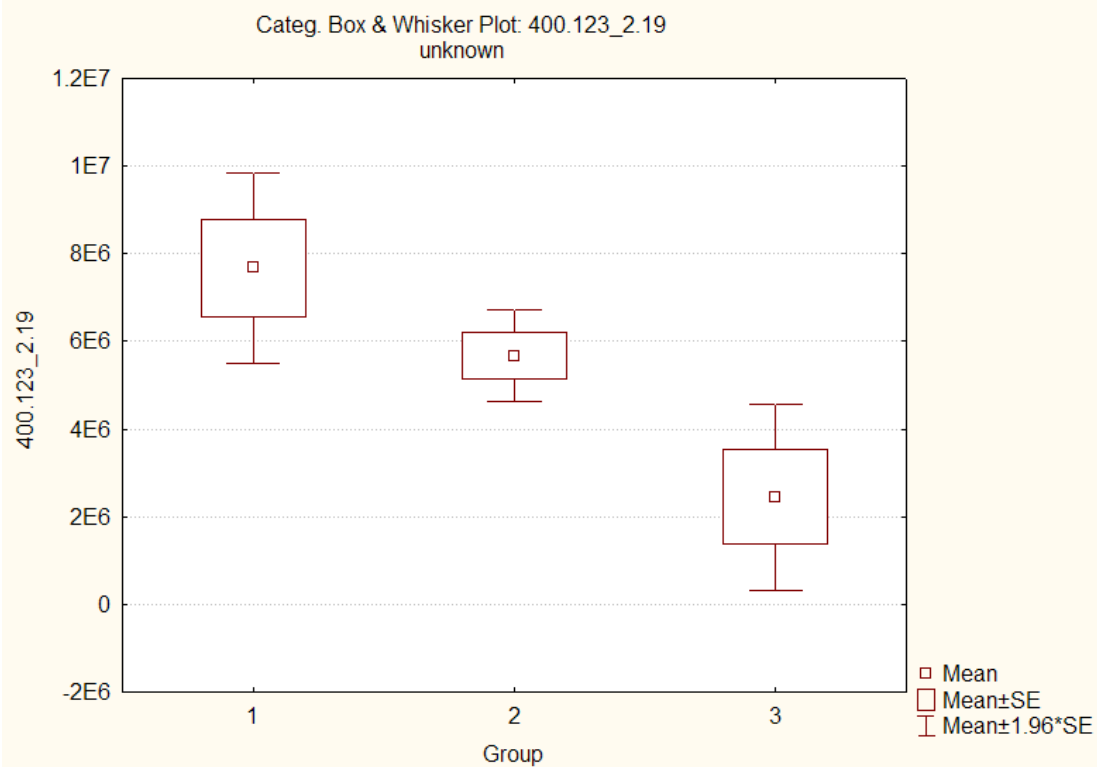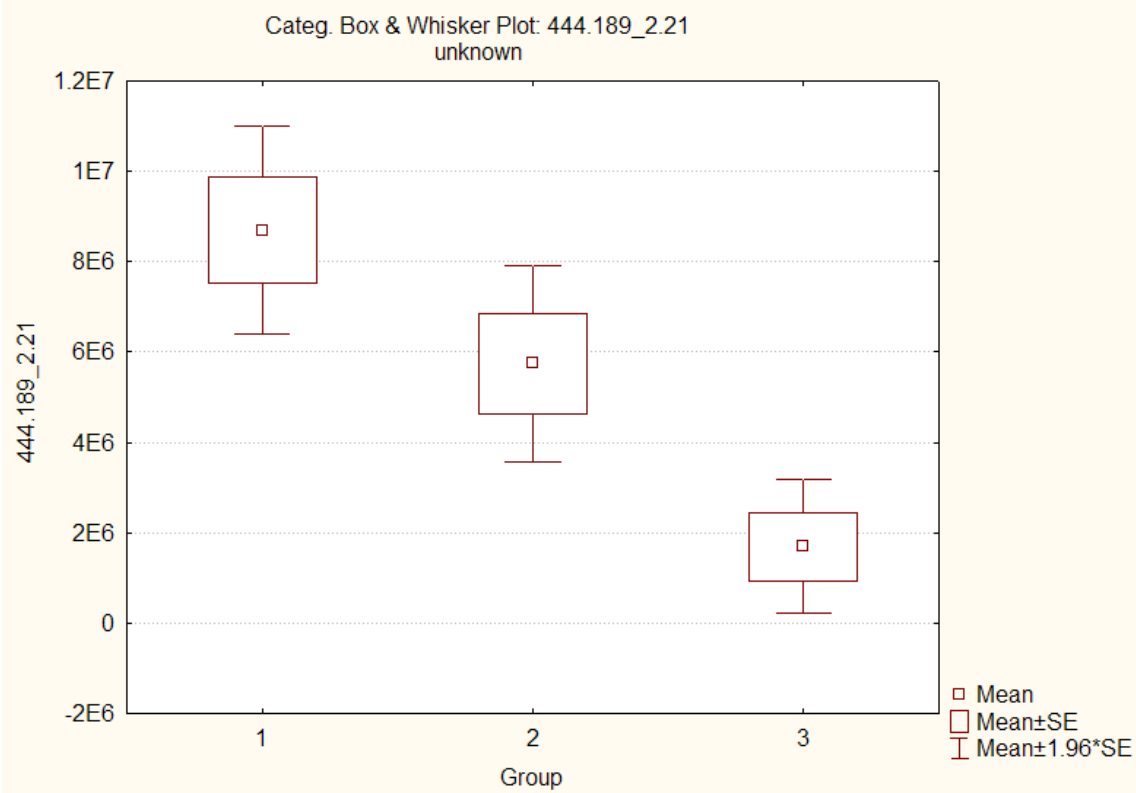

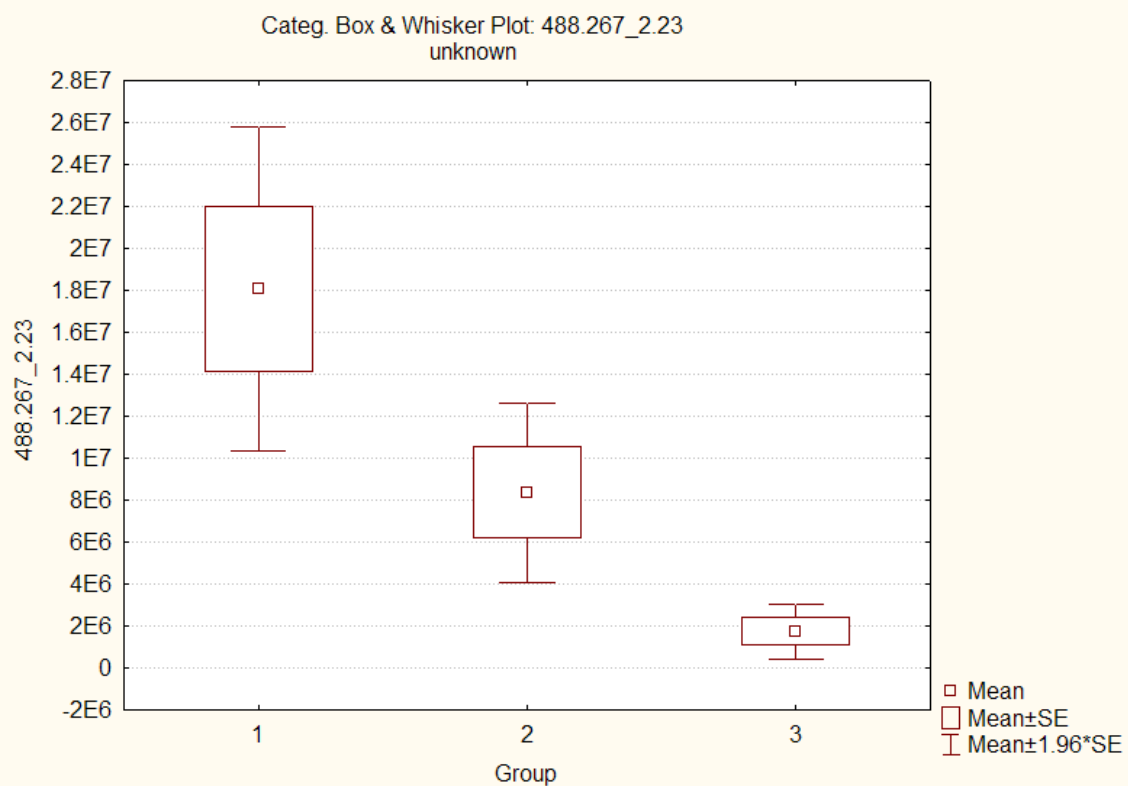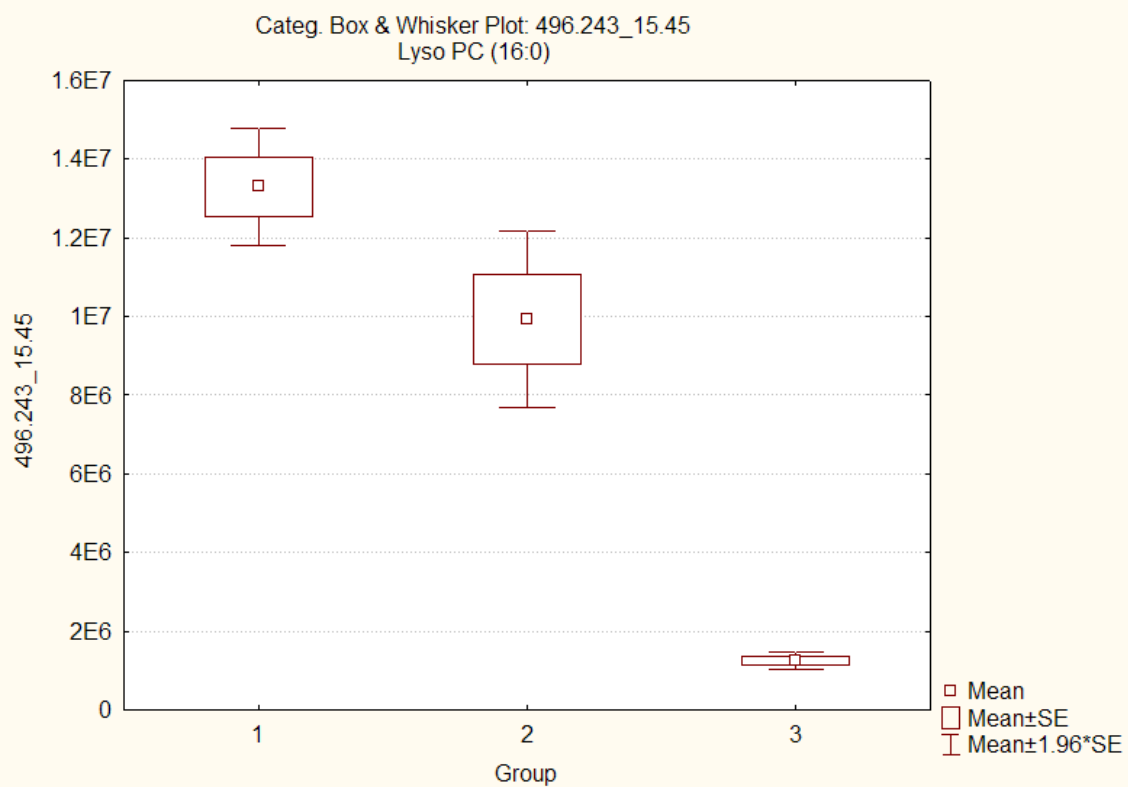

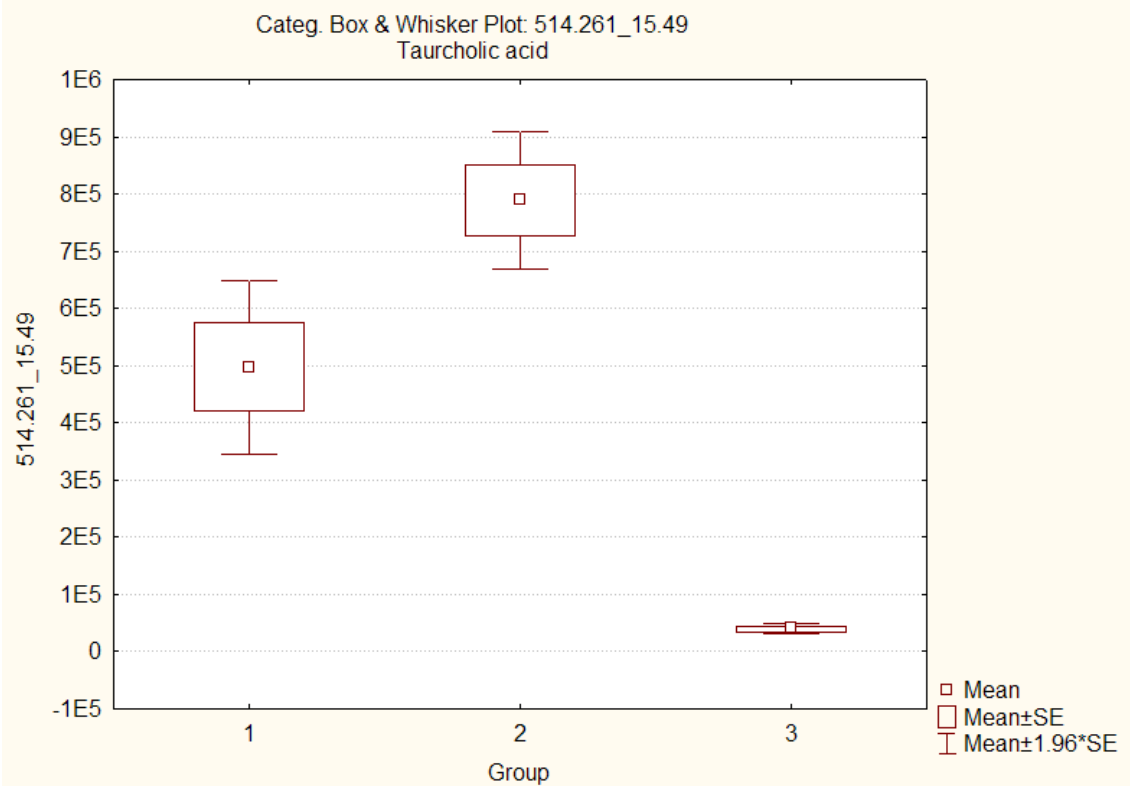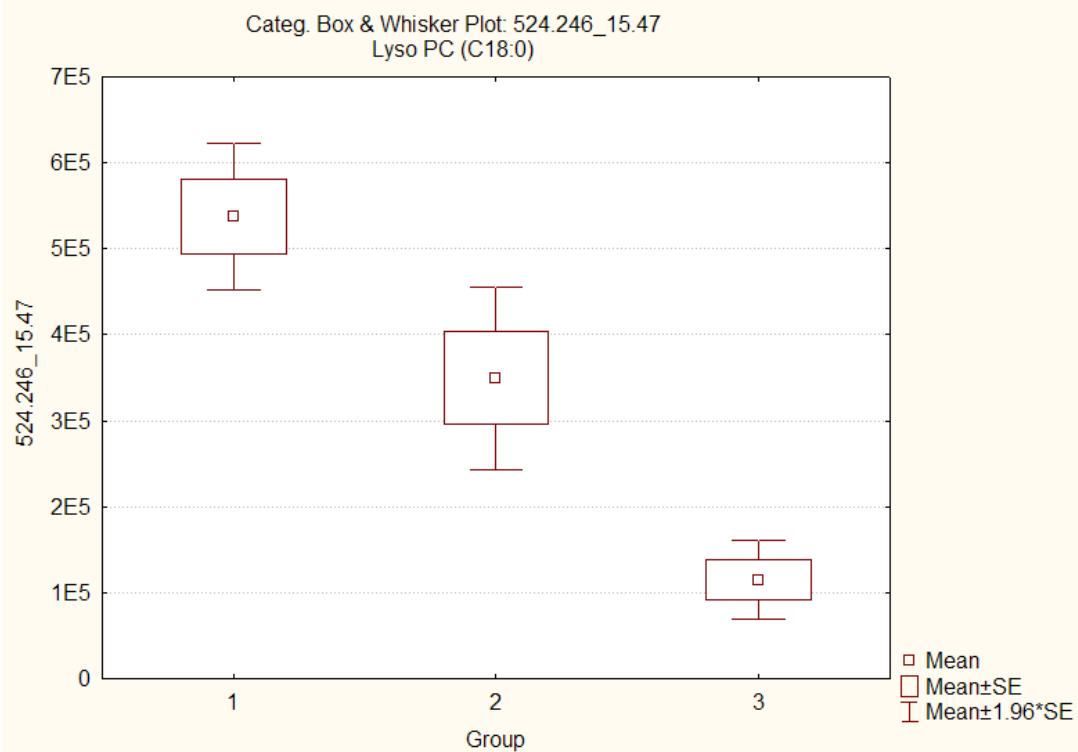

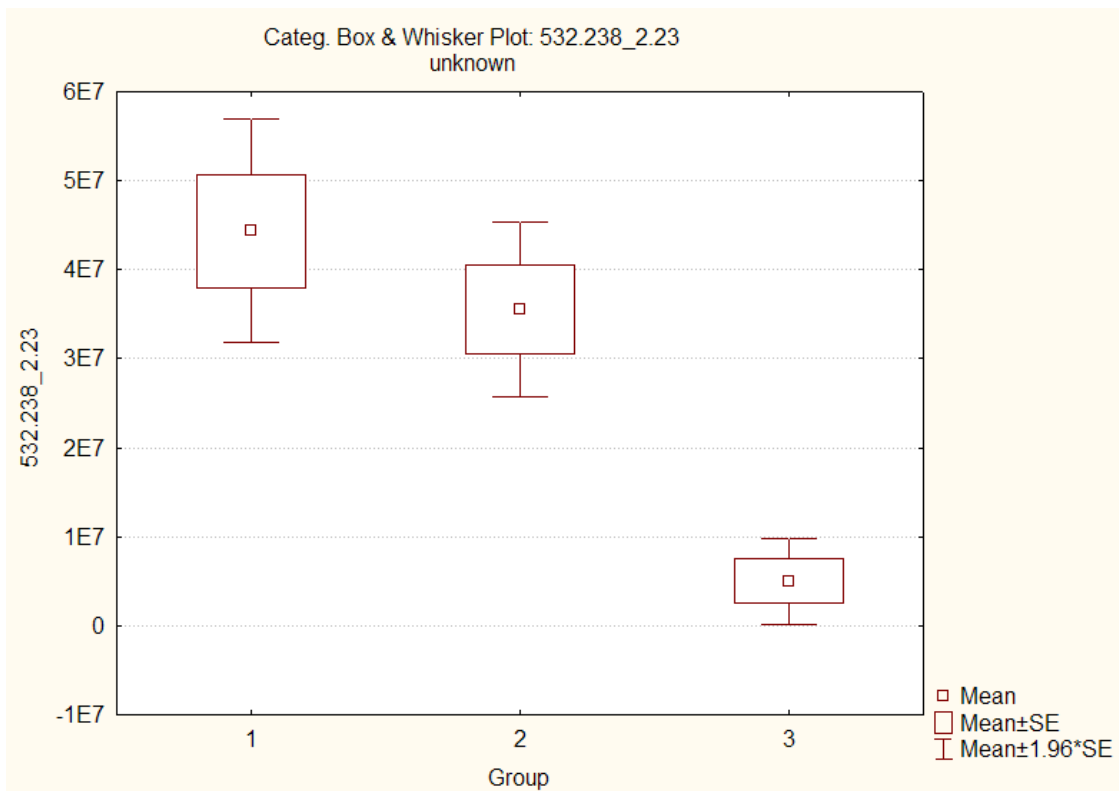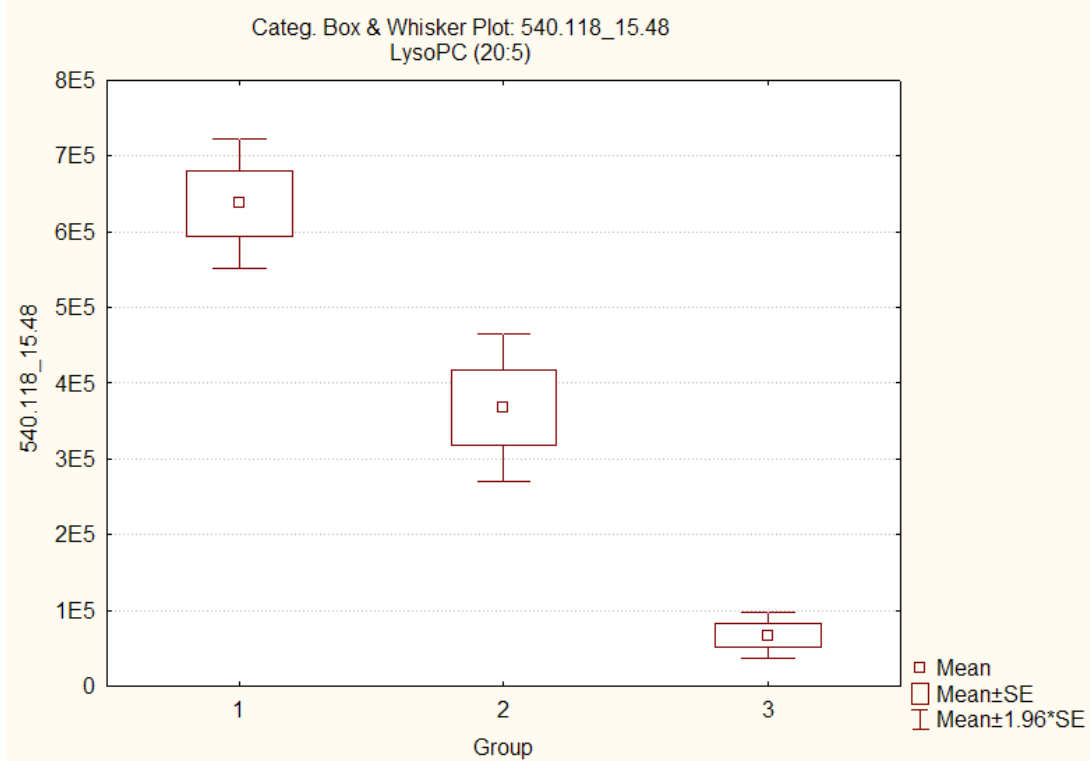

**Table S3. Report on HILIC-LC/MS profiling annotation of HEK293-hOCT1 versus HEK293-empty vector cells**

**Samples:**

Group 1: HEK293-Empty Vector

Group 2: HEK293-human OCT1(HEK293-hOCT1)

| Sample Name         | Group |
|---------------------|-------|
| 1ch.wiff (sample 1) | 1     |
| 1h.wiff (sample 1)  | 2     |
| 2ch.wiff (sample 1) | 1     |
| 2h.wiff (sample 1)  | 2     |
| 3ch.wiff (sample 1) | 1     |
| 3h.wiff (sample 1)  | 2     |
| 4ch.wiff (sample 1) | 1     |
| 4h.wiff (sample 1)  | 2     |
| 5ch.wiff (sample 1) | 1     |
| 5h.wiff (sample 1)  | 2     |
| 6ch.wiff (sample 1) | 1     |
| 6h.wiff (sample 1)  | 2     |

**List of metabolites overproduced in HEK293-hOCT1 group**

| Peak Name         | m/z     | Ret. Time (min) | Comment                                   |
|-------------------|---------|-----------------|-------------------------------------------|
| 116.2/19.1 (94)   | 116.186 | 19.1            | proline                                   |
| 120.2/21.0 (108)  | 120.169 | 21.0            | threonine                                 |
| 122.1/15.2 (109)  | 122.117 | 15.2            | Aminobutantriol                           |
| 144.1/15.2 (255)  | 144.076 | 15.2            | Amino-oxo-proline                         |
| 177.1/14.3 (470)  | 177.070 | 14.3            | 2,3-Dimethyl-3-hydroxyglutarate           |
| 218.1/17.0 (805)  | 218.137 | 17.0            | propionyl carnitine                       |
| 226.9/19.4 (840)  | 226.950 | 19.4            | unknown                                   |
| 232.2/16.2 (874)  | 232.160 | 16.2            | unknown                                   |
| 235.0/19.3 (898)  | 235.035 | 19.3            | 5,6-dihydroxy-1H-indole-2-carboxylic acid |
| 246.2/15.7 (1010) | 246.164 | 15.7            | 2-Methylbutyrylcarnitine                  |
| 258.1/22.9 (1094) | 258.059 | 22.9            | 5-Methylcytidine                          |
| 265.0/15.2 (1117) | 265.022 | 15.2            | thiamine                                  |
| 277.1/14.4 (1294) | 277.092 | 14.4            | 6-Ribitylamino-5-aminouracil              |
| 304.3/2.3 (1427)  | 304.314 | 2.3             | N-Acylsphingosine                         |
| 308.0/26.6 (1508) | 308.026 | 26.6            | Glutathione                               |
| 333.1/14.3 (1641) | 333.086 | 14.3            | Gln-Asp-Ala                               |
| 339.3/8.9 (1686)  | 339.282 | 8.9             | Cetoleic acid                             |
| 351.0/14.4 (1724) | 351.049 | 14.4            | Gln-Asp-Ala ammonia adduct                |
| 399.1/2.2 (2119)  | 399.055 | 2.2             | 2-Acetyl-1-oleoyl-sn-glycerol             |
| 400.3/14.0 (2123) | 400.267 | 14.0            | unknown                                   |
| 520.2/2.2 (2609)  | 520.201 | 2.2             | unknown lipid                             |
| 535.8/2.2 (2645)  | 535.778 | 2.2             | unknown lipid                             |
| 543.0/16.3 (2672) | 543.032 | 16.3            | LysoPE ammonia adduct                     |

## Peaks and their responses

- 1: HEK293-Empty Vector (●)
- 2: HEK293-human OCT1(HEK293-hOCT1)(▲)

### Peak: 116.2/19.1 (94)

Overproduced in HEK293-hOCT1 group

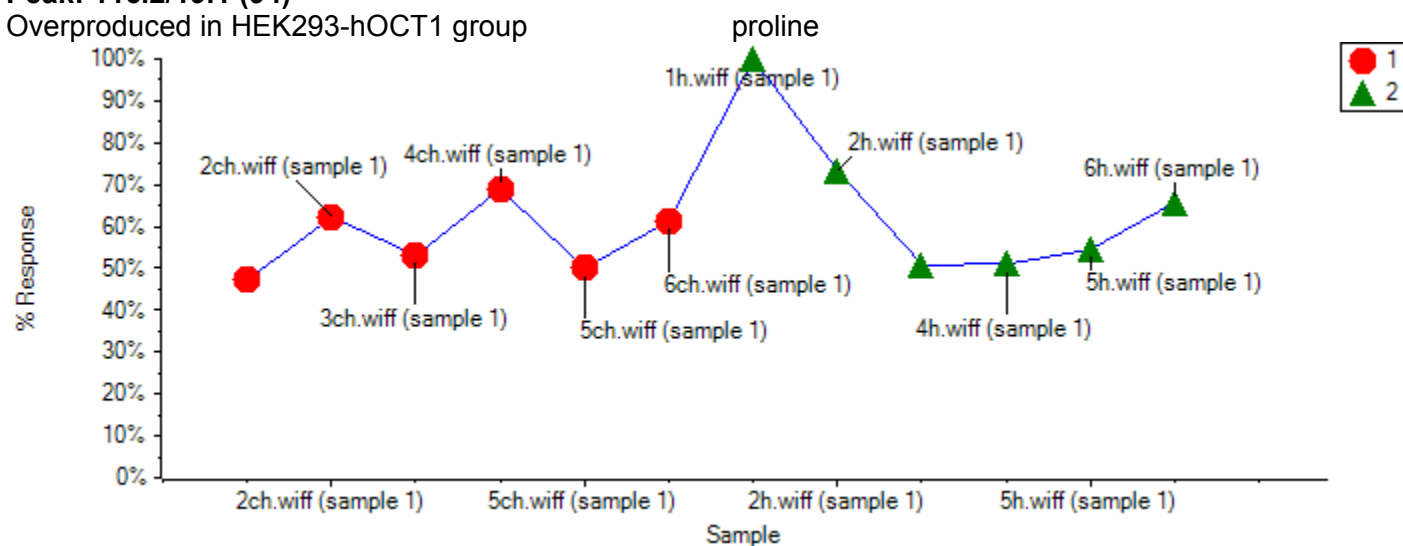

### Peak: 120.2/21.0 (108)

Overproduced in HEK293-hOCT1 group

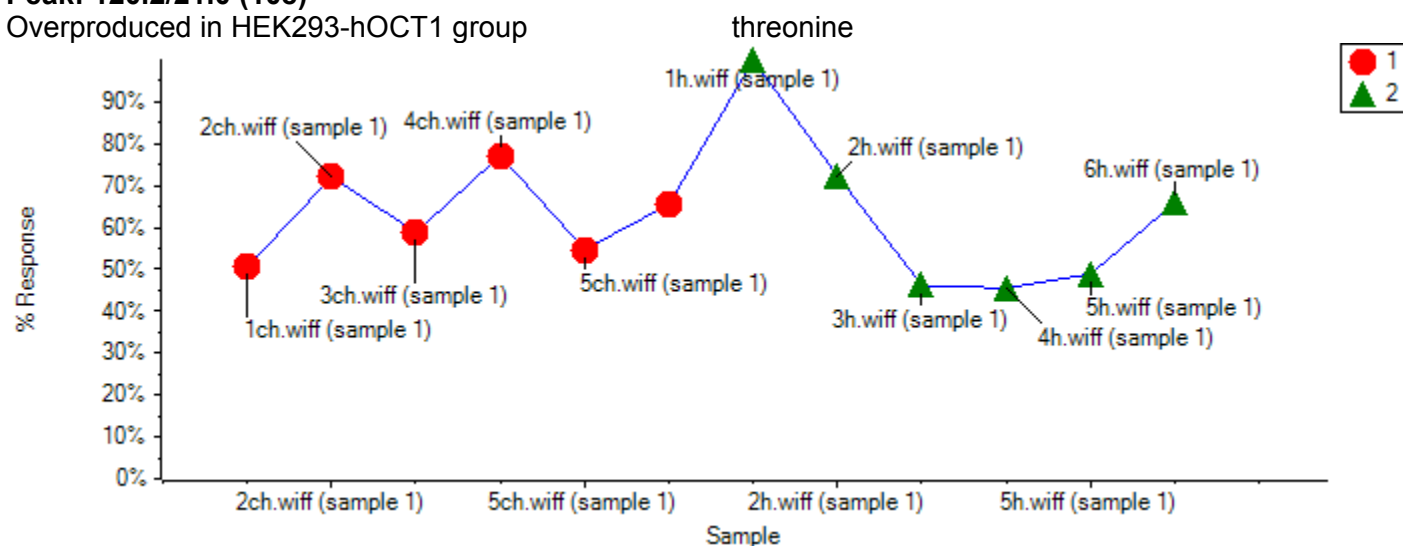

**Peak: 122.1/15.2 (109)**

Overproduced in HEK293-hOCT1 group

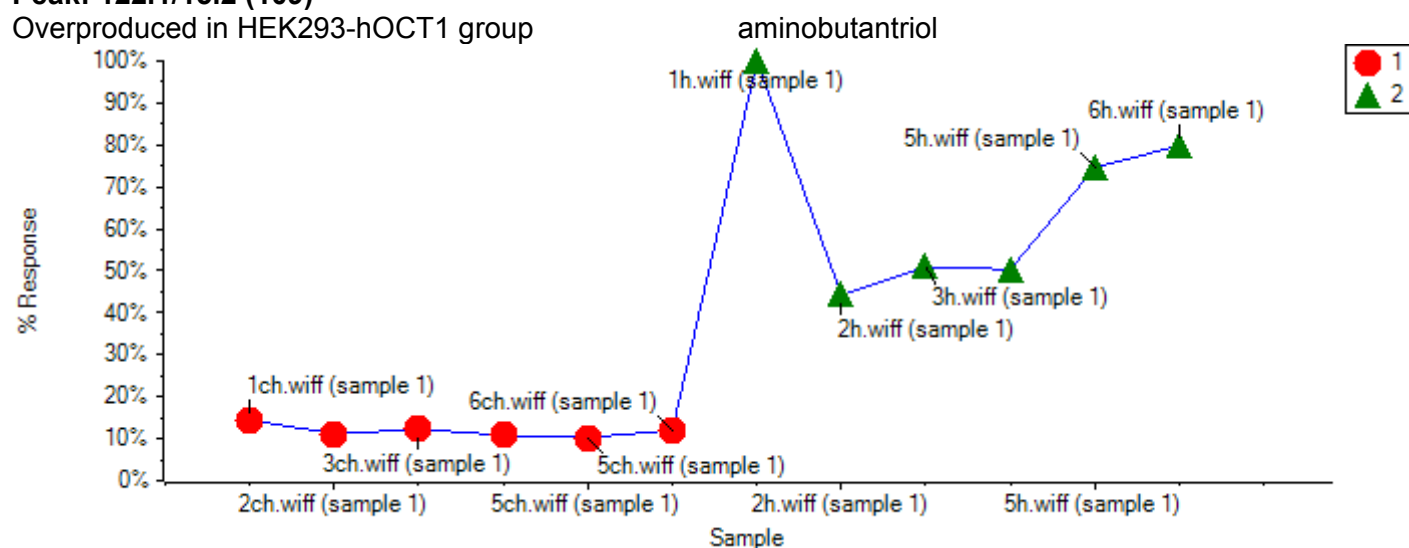**Peak: 144.1/15.2 (255)**

Overproduced in HEK293-hOCT1 group

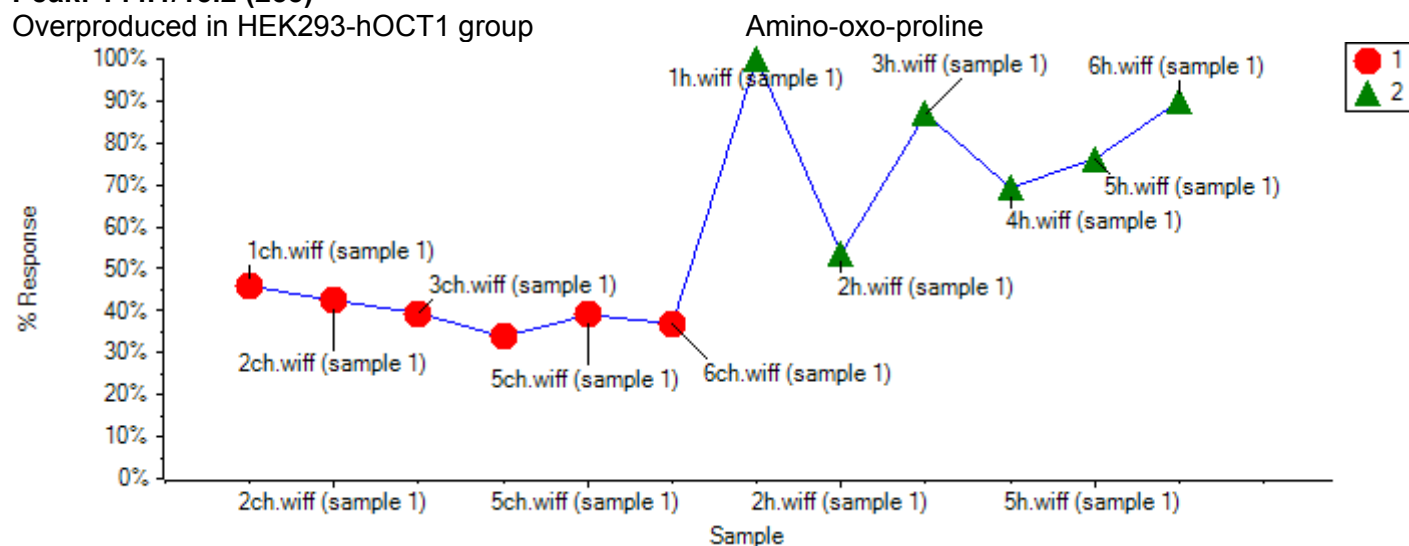

**Peak: 177.1/14.3 (470)**

Overproduced in HEK293-hOCT1 group

unknown

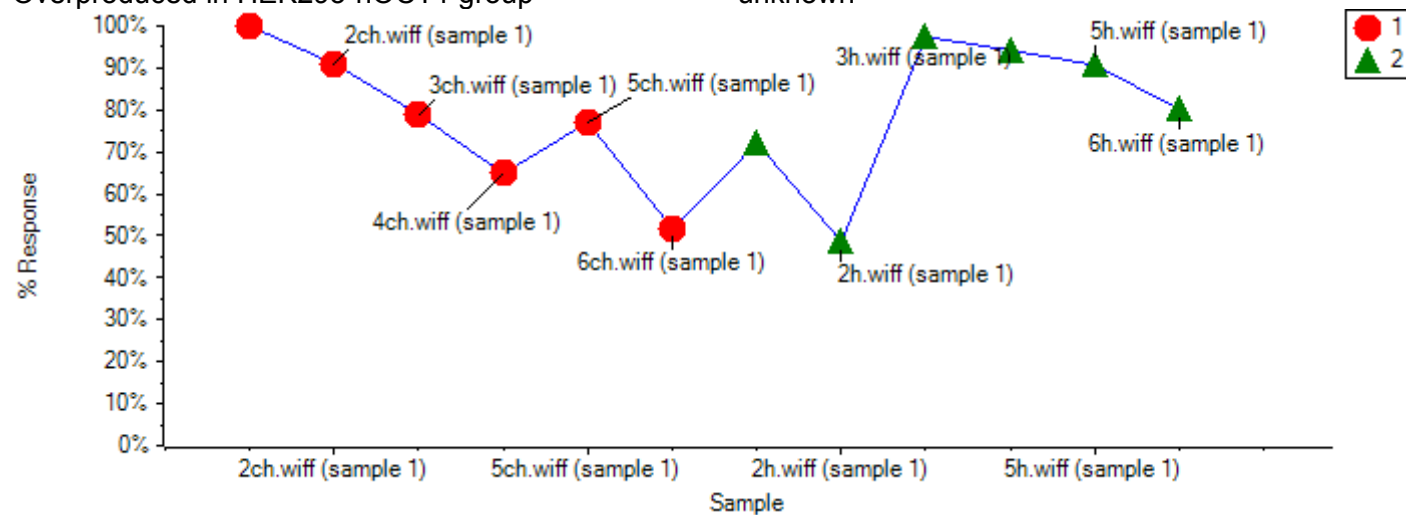**Peak: 218.1/17.0 (805)**

Overproduced in HEK293-hOCT1 group

propionyl carnitine

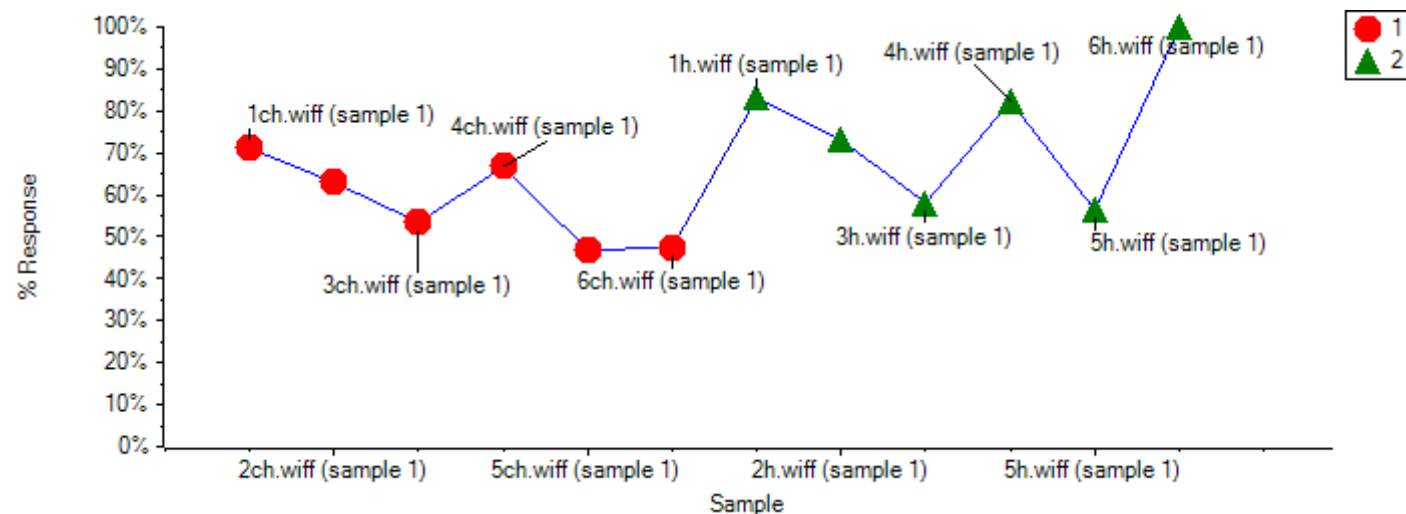

**Peak: 226.9/19.4 (840)**

Overproduced in HEK293-hOCT1 group

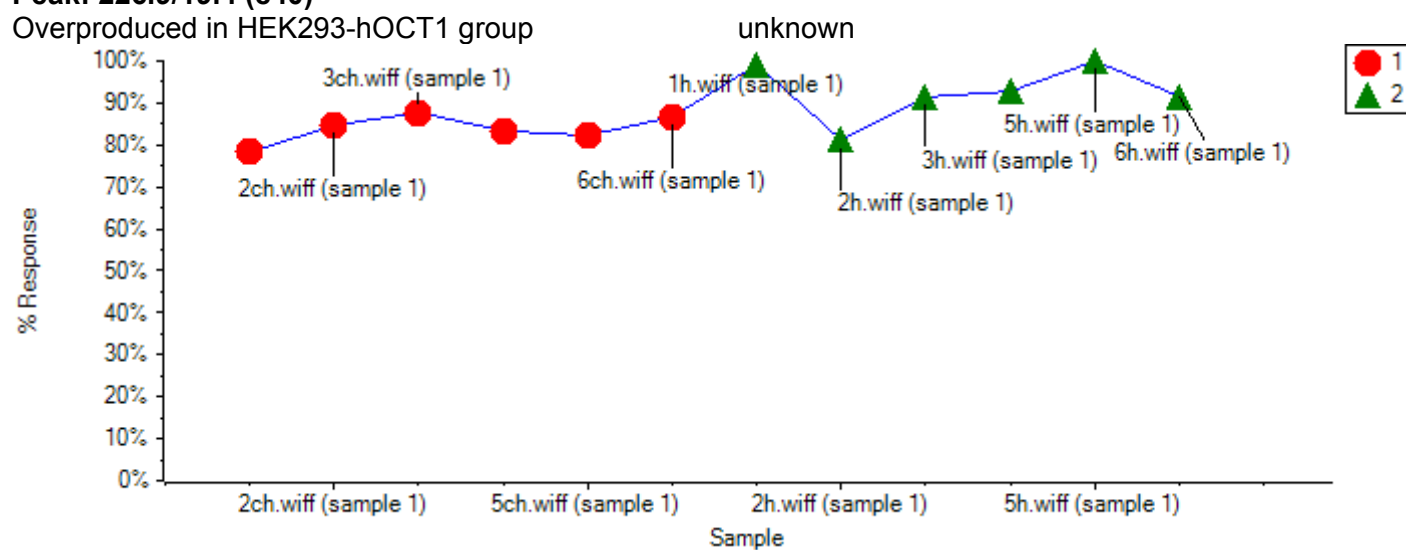**Peak: 232.2/16.2 (874)**

Overproduced in HEK293-hOCT1 group

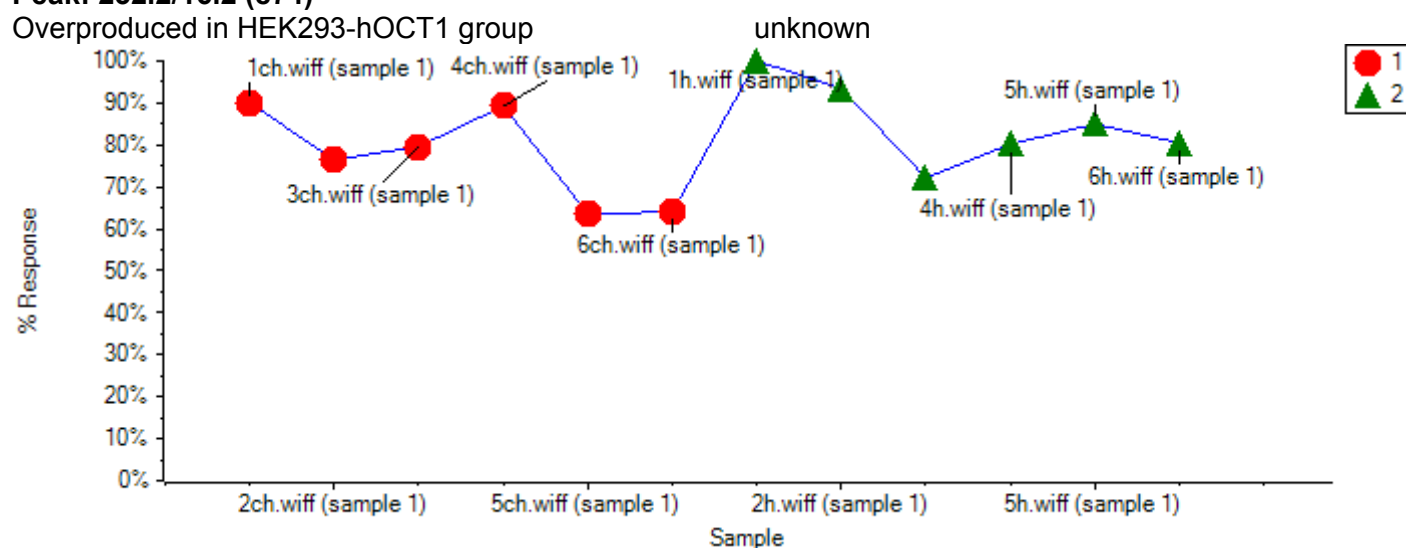

**Peak: 235.0/19.3 (898)**

Overproduced in HEK293-hOCT1 group

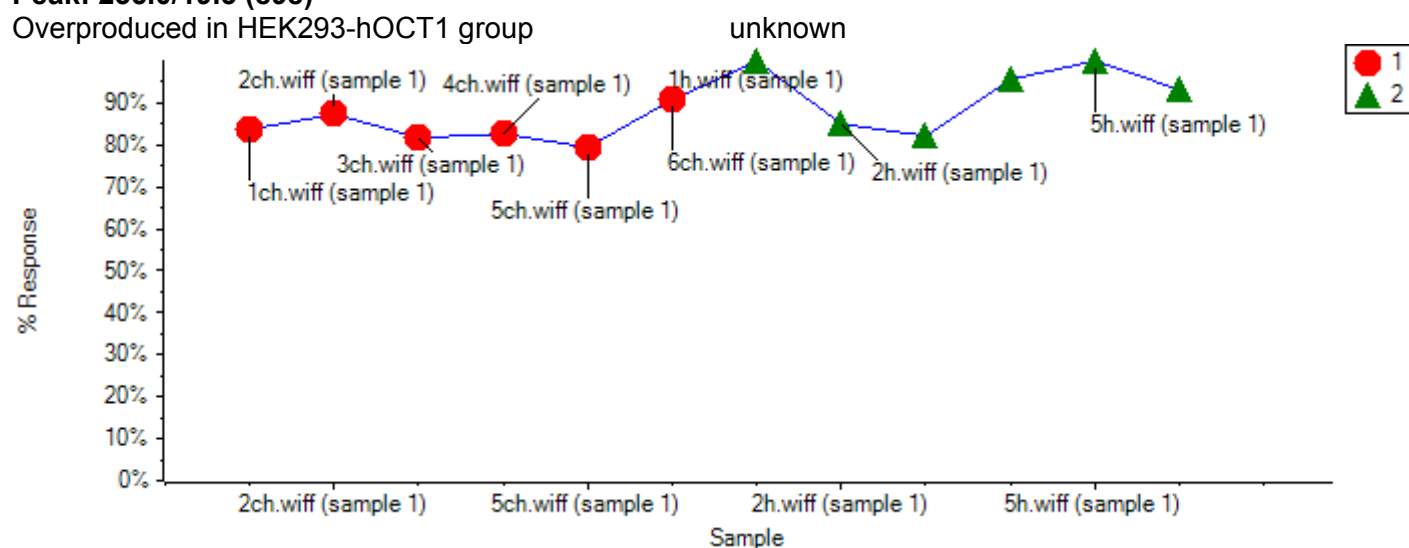**Peak: 246.2/15.7 (1010)**

Overproduced in HEK293-hOCT1 group

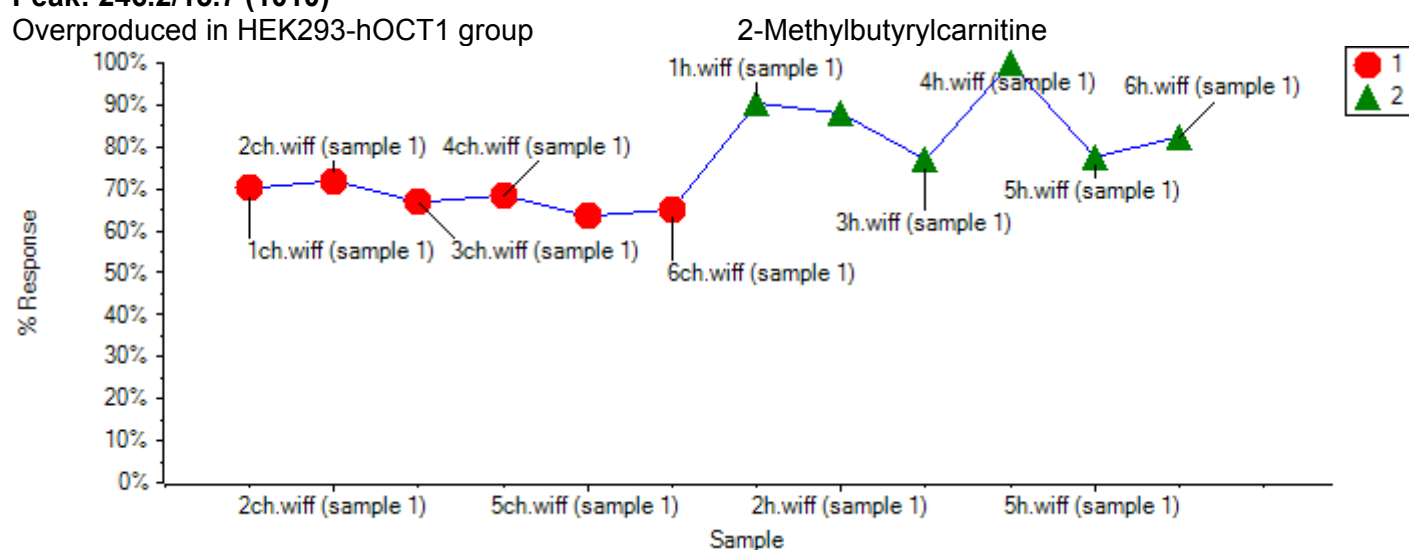

**Peak: 258.1/22.9 (1094)**

Overproduced in HEK293-hOCT1 group

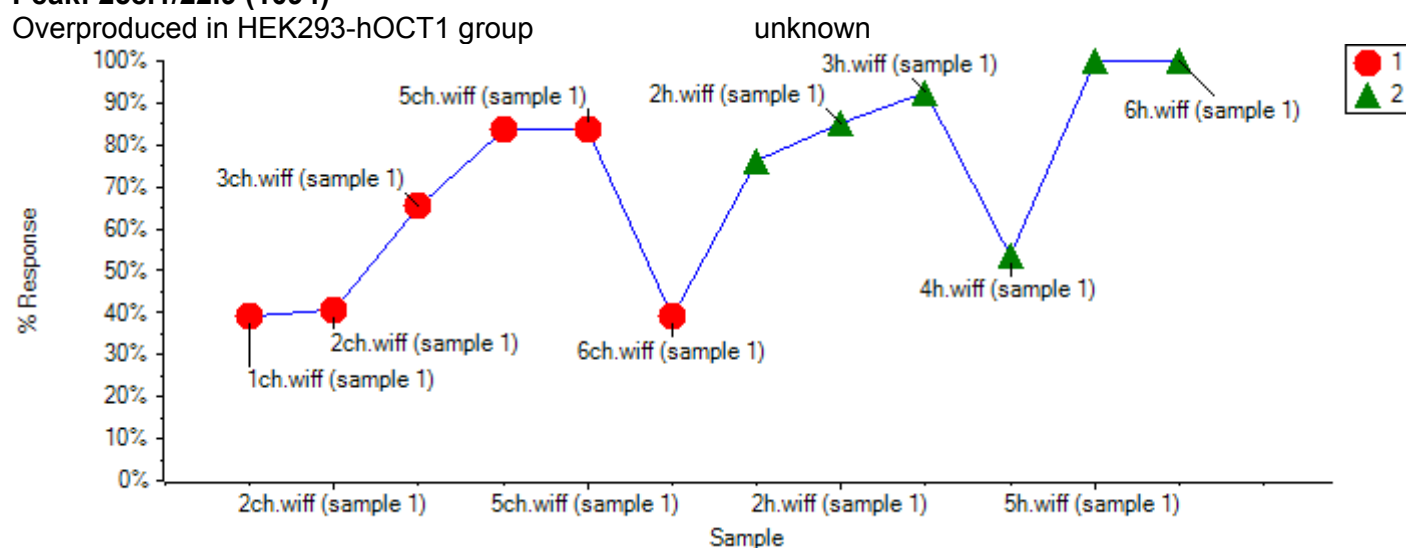**Peak: 265.0/15.2 (1117)**

Overproduced in HEK293-hOCT1 group

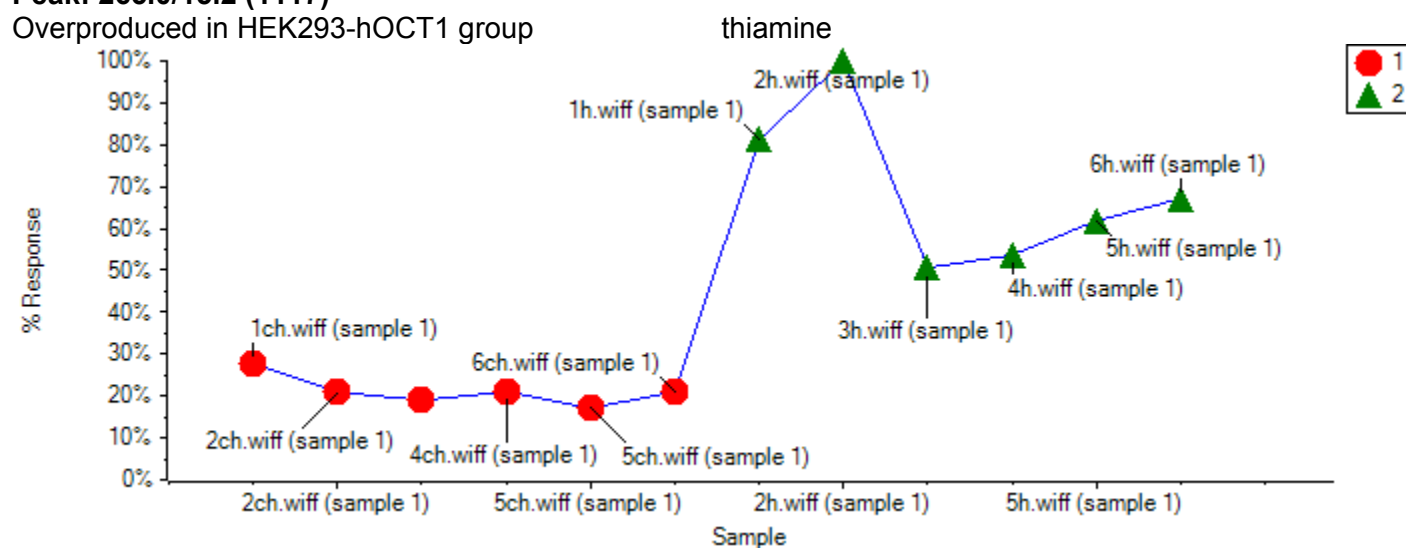

**Peak: 277.1/14.4 (1294)**

Overproduced in HEK293-hOCT1 group

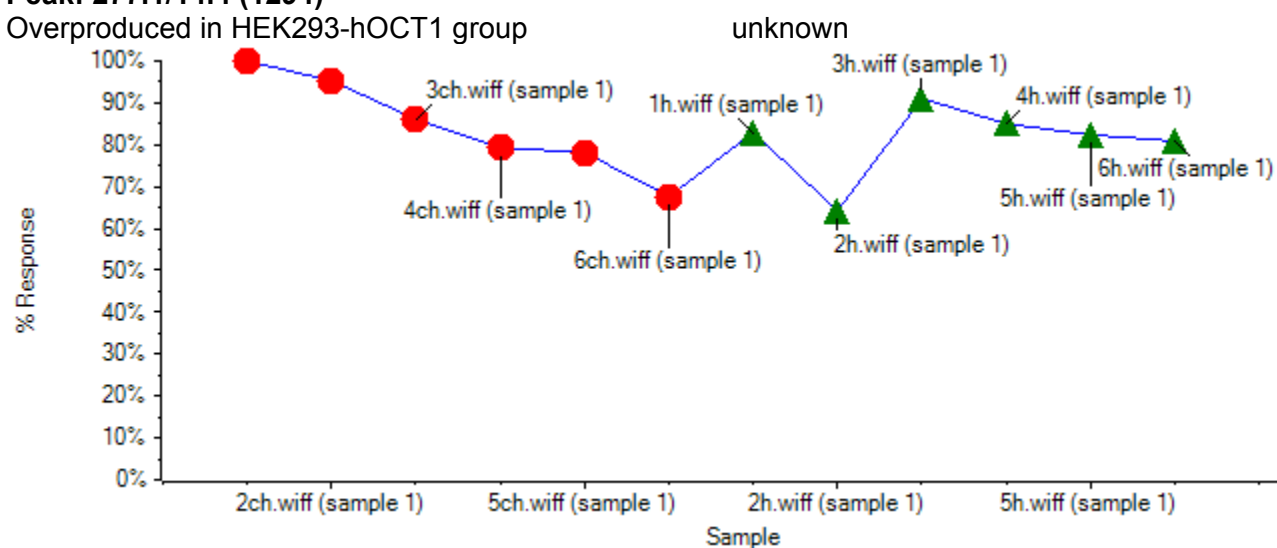**Peak: 304.3/2.3 (1427)**

Overproduced in HEK293-hOCT1 group

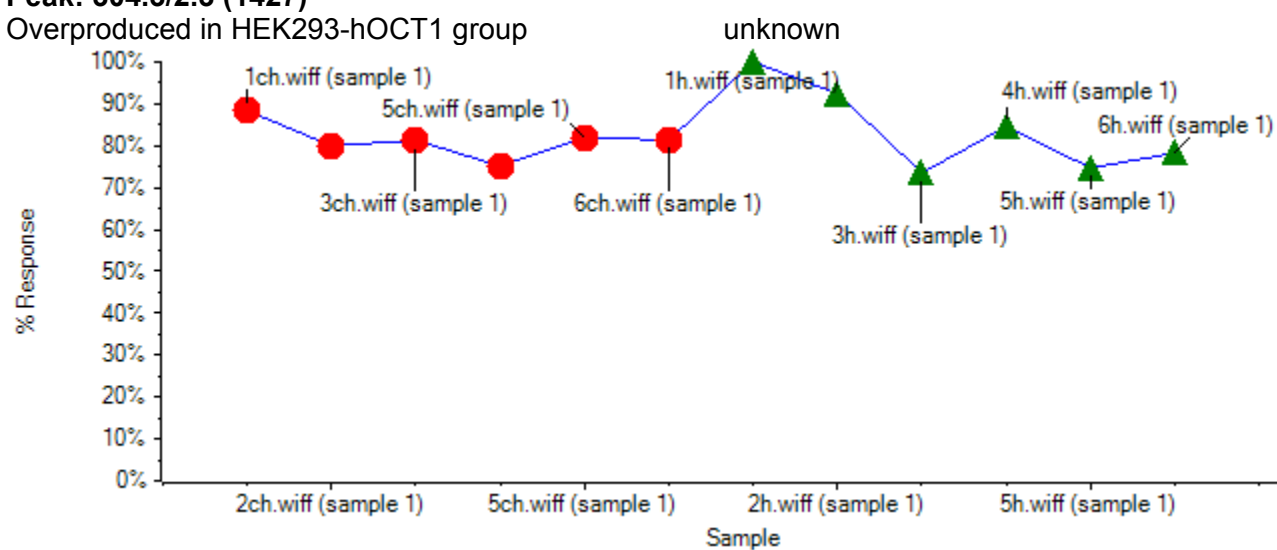

**Peak: 308.0/26.6 (1508)**

Overproduced in HEK293-hOCT1 group

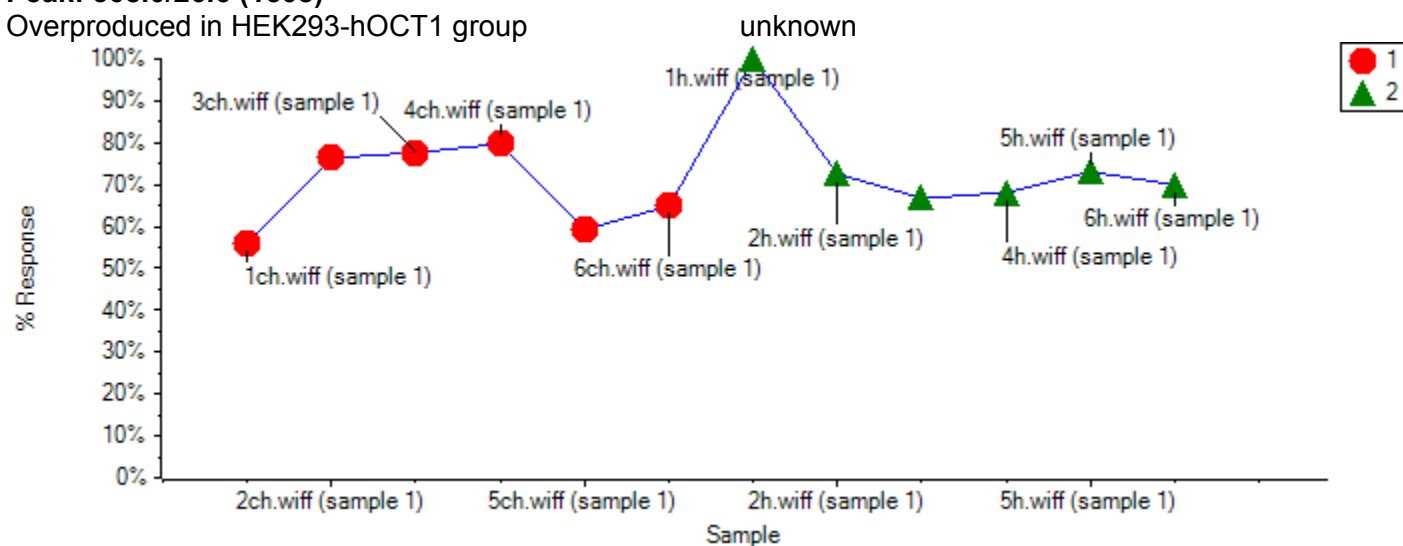**Peak: 333.1/14.3 (1641)**

Overproduced in HEK293-hOCT1 group

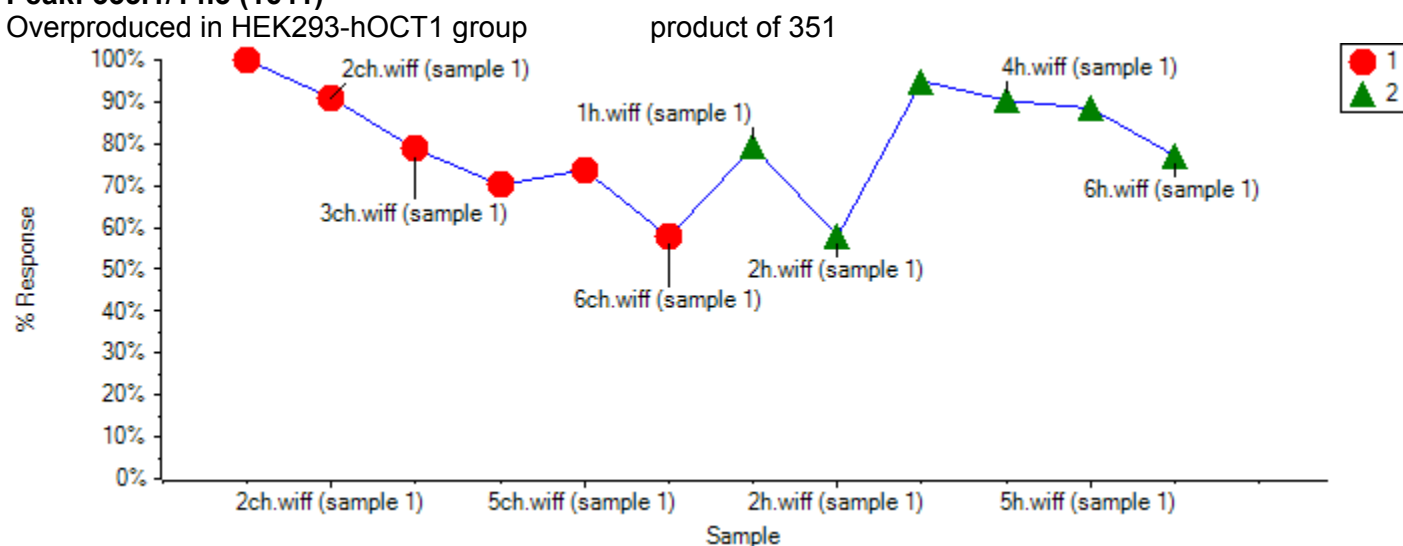

**Peak: 339.3/8.9 (1686)**

Overproduced in HEK293-hOCT1 group

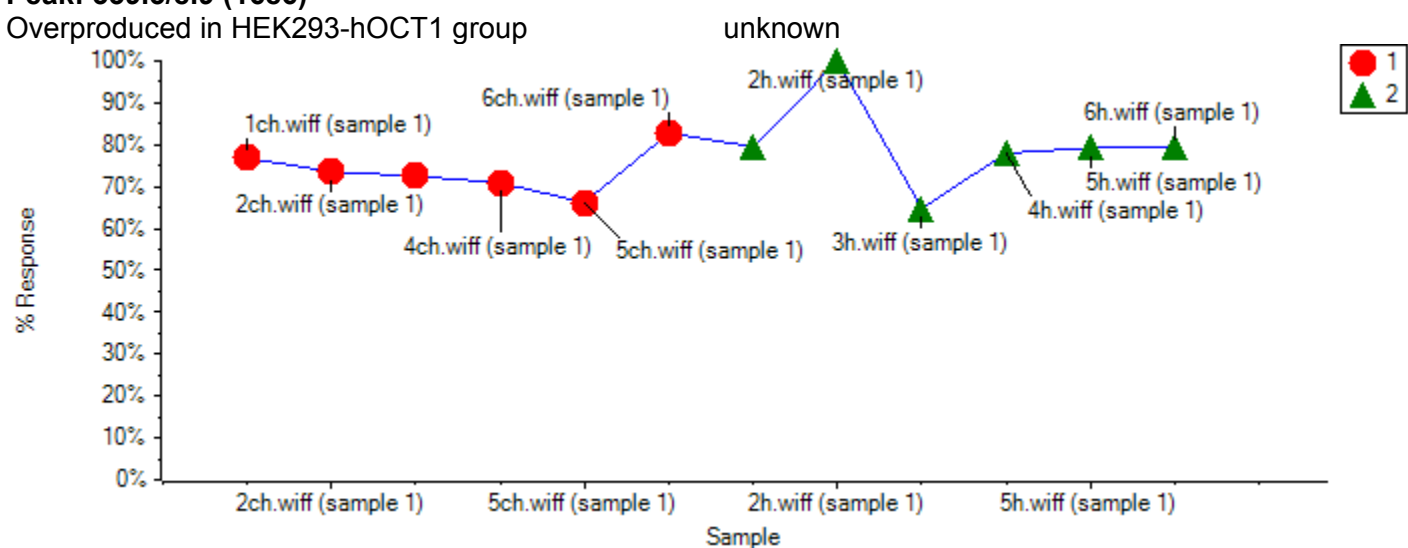**Peak: 351.0/14.4 (1724)**

Overproduced in HEK293-hOCT1 group

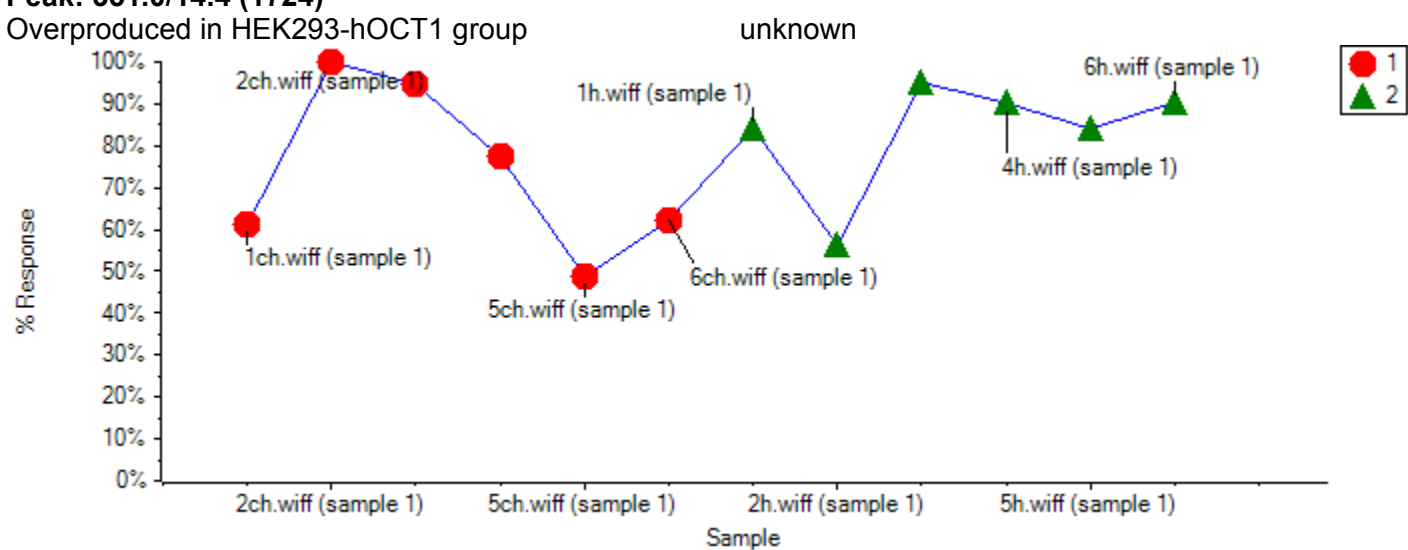

**Peak: 399.1/2.2 (2119)**

Overproduced in HEK293-hOCT1 group

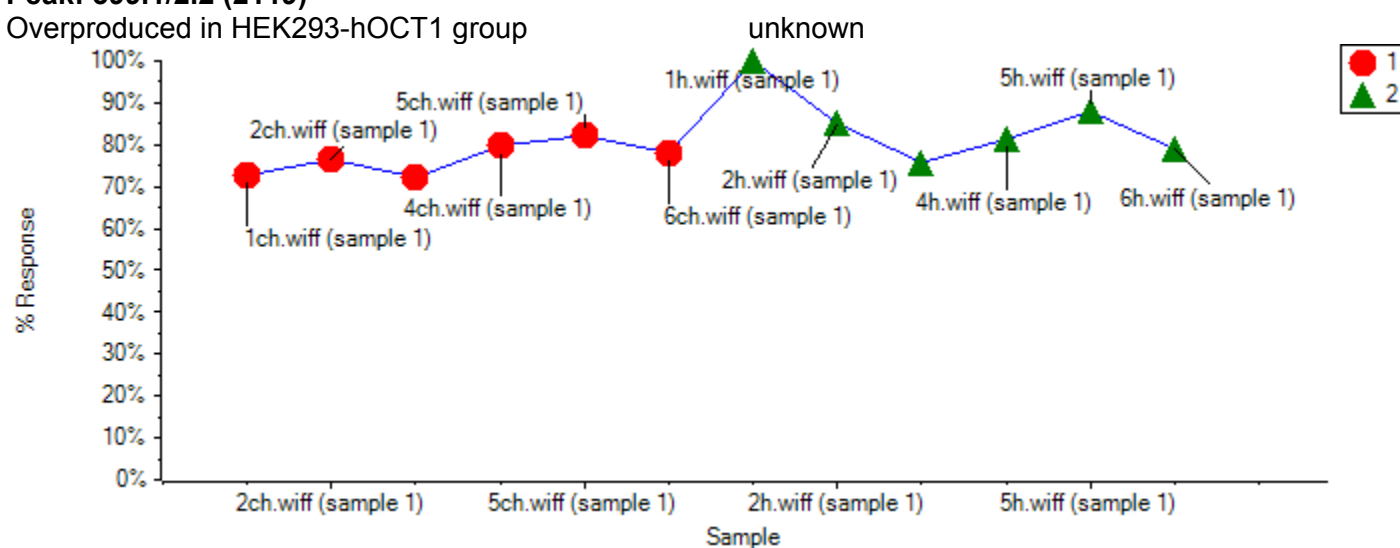**Peak: 400.3/14.0 (2123)**

Overproduced in HEK293-hOCT1 group

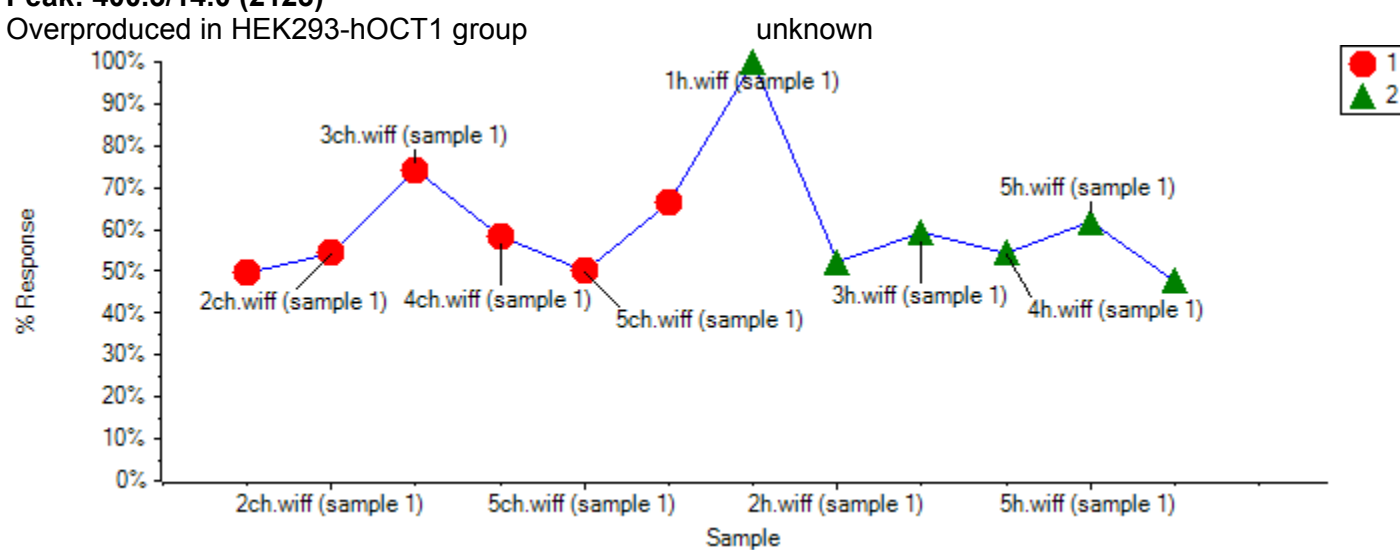

**Peak: 520.2/2.2 (2609)**

Overproduced in HEK293-hOCT1 group

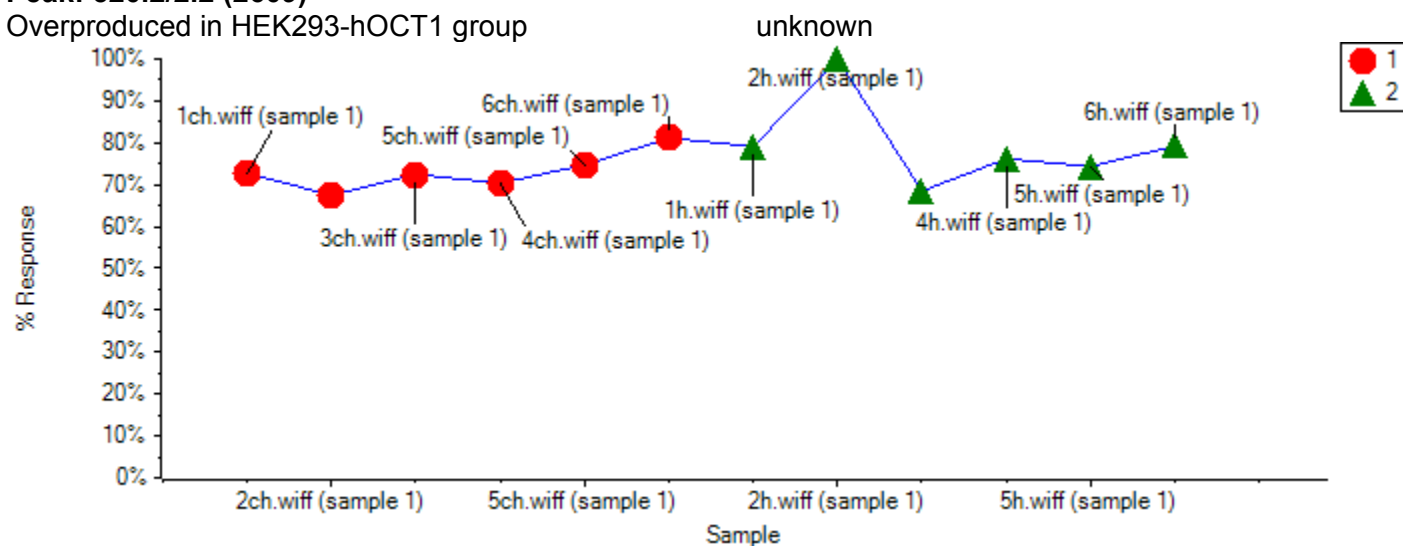**Peak: 535.8/2.2 (2645)**

Overproduced in HEK293-hOCT1 group unknown

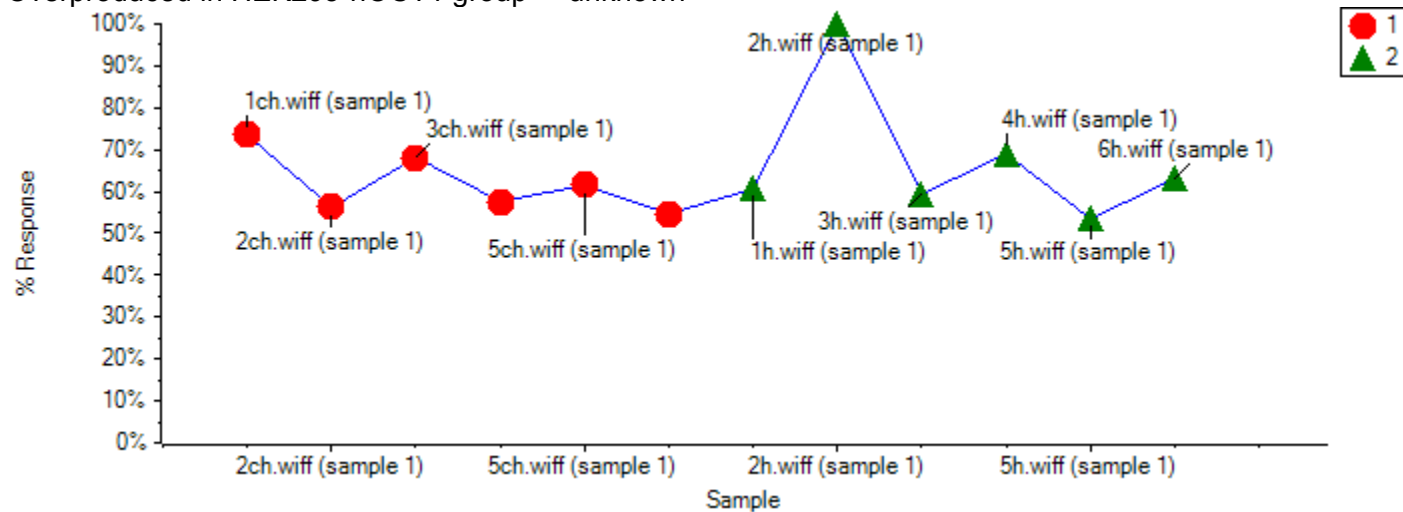

**Peak: 543.0/16.3 (2672)**

Overproduced in HEK293-hOCT1 group

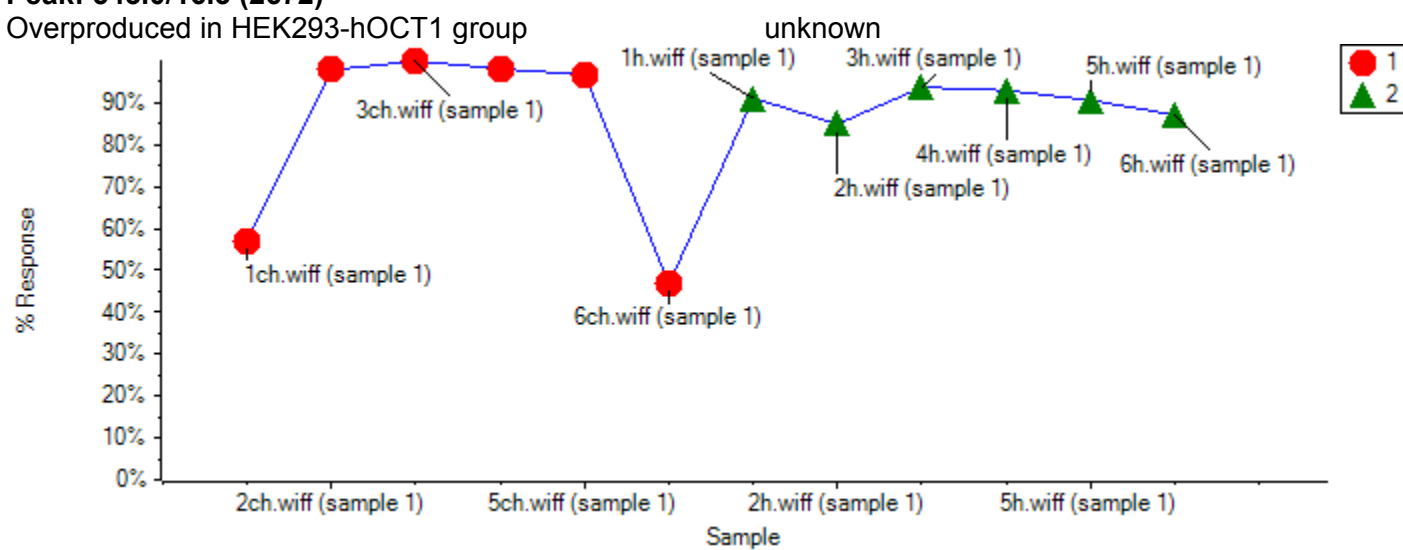

**Table S4. The kinetics parameters of thiamine transport by human OCT1, OCT2, MATE1 and mouse Oct1 and Slc19a2 in transfected cells.**

| <b>Kinetic parameter</b>        | <b>OCT1</b>      | <b>Oct1</b>           | <b>Slc19a2</b>        | <b>OCT2</b>          | <b>MATE1</b>         |
|---------------------------------|------------------|-----------------------|-----------------------|----------------------|----------------------|
| $V_{max}$ (nmol/mg protein/min) | $2.77 \pm 0.14$  | $5.80 \pm 0.37^{**}$  | $0.76 \pm 0.092^{**}$ | $4.56 \pm 0.33^{**}$ | $2.94 \pm 0.27^{**}$ |
| $K_m$ (mM)                      | $0.78 \pm 0.064$ | $0.49 \pm 0.035^{**}$ | $0.17 \pm 0.021^{**}$ | $0.75 \pm 0.045$     | $0.83 \pm 0.11$      |
| $V_{max}/K_m$                   | 3.64             | 12.08                 | 4.47                  | 6.08                 | 3.54                 |

Studies were performed in HEK293 cells stably-transfected with the following transporters. Each uptake experiment was repeated at least 3 times with triplicate samples each time. All data are expressed as Mean  $\pm$  SEM,  $^{**}P < 0.01$ , compared with OCT1.

**Table S5. Parameters obtained from MRI studies and following liver surgery.**

|                                | <i>Oct1</i> <sup>+/+</sup> | <i>Oct1</i> <sup>-/-</sup> | <i>Oct1</i> <sup>+/+,OCT1tg</sup> | <i>Oct1</i> <sup>-/-,OCT1tg</sup> |
|--------------------------------|----------------------------|----------------------------|-----------------------------------|-----------------------------------|
| <b>Volume (cm<sup>3</sup>)</b> | 2.05 ± 0.13                | 1.61 ± 0.18**              | 3.21 ± 0.35**                     | 2.13 ± 0.21                       |
| <b>% liver fat</b>             | 37.3 ± 6.2 %               | 28.5 ± 2.6%***             | 52.2 ± 5.1%***                    | 40.6 ± 2.8%                       |
| <b>Liver weight (g)</b>        | 2.76 ± 0.28                | 2.19 ± 0.14**              | 4.53 ± 0.35**                     | 2.84 ± 0.19                       |
| <b>% BW</b>                    | 5.21 ± 0.50%               | 4.13 ± 0.29%**             | 8.95 ± 1.2%**                     | 5.54 ± 0.71%                      |

All data are expressed as Mean ± SEM, \*\**P* < 0.01, compared with OCT1. Mice were fed with high fat diet for 16 weeks (n=3/genotypes).
